# Supplementary material for: LH/hCG Regulation of Circular RNA in Mural Granulosa Cells during the Periovulatory Period in Mice
Source: MDPI journal article supplement (doi:10.3390/ijms241713078), 2023-08-23
Supplement: s1 [file s1=3fversion=3d1692756616]

## Sheet: Sheet0
ID	Symbol	Source	miRNA Confidence	Symbol	Entrez Gene Name	Disease	Location	Molecule Type	Pathway	Species	Tissue/Cell Line
hsa-miR-1178	miR-1178-3p (miRNAs w/seed UGCUCAC)	TargetScan Human	High (predicted)	AADAC	arylacetamide deacetylase	Cancer,Dermatological Diseases and Conditions,Endocrine System Disorders,Gastrointestinal Disease,Hepatic System Disease,Metabolic Disease,Neurological Disease,Organismal Injury and Abnormalities,Reproductive System Disease,Respiratory Disease	Cytoplasm	enzyme	Heparan Sulfate Biosynthesis,Heparan Sulfate Biosynthesis (Late Stages),Retinol Biosynthesis,Triacylglycerol Degradation	Human,Mouse,Rat	Adipocytes,Adipose,Adrenal Gland,B lymphocytes not otherwise specified,Cardiomyocytes,Crypt,Dendritic cells not otherwise specified,Dermis,Endothelial cells not otherwise specified,Epidermis,Fibroblasts,Heart,Hematopoietic progenitor cells,Hepatocytes,Keratinocytes,Kidney,Langerhans cells,Large Intestine,Liver,Lung,Macrophages not otherwise specified,Mammary Gland,Melanocytes,Other Cells,Other Ep…
hsa-miR-1178	miR-1178-3p (miRNAs w/seed UGCUCAC)	TargetScan Human	High (predicted)	AMMECR1	AMMECR nuclear protein 1	Auditory Disease,Cancer,Connective Tissue Disorders,Endocrine System Disorders,Gastrointestinal Disease,Hematological Disease,Hereditary Disorder,Immunological Disease,Neurological Disease,Organismal Injury and Abnormalities,Renal and Urological Disease,Reproductive System Disease,Respiratory Disease	Nucleus	other		Human,Mouse,Rat	Adipocytes,Adipose,Astrocytes,B lymphocytes not otherwise specified,BDCA-1+ dendritic cells,BDCA-3+ dendritic cells,Cardiomyocytes,Central memory cytotoxic T cells,Crypt,Dendritic cells not otherwise specified,Dermis,Effector memory cytotoxic T cells,Effector memory RA+ cytotoxic T cells,Endothelial cells not otherwise specified,Epidermis,Fibroblasts,Granulocytes not otherwise specified,Granulosa…
hsa-miR-1178	miR-1178-3p (miRNAs w/seed UGCUCAC)	TargetScan Human	High (predicted)	APRG1	APRG1 tumor suppressor candidate		Other	other		Human
hsa-miR-1178	miR-1178-3p (miRNAs w/seed UGCUCAC)	TargetScan Human	High (predicted)	ART4	ADP-ribosyltransferase 4 (inactive) (Dombrock blood group)	Cancer,Dermatological Diseases and Conditions,Organismal Injury and Abnormalities	Nucleus	enzyme		Human,Mouse,Rat	Adipocytes,Adipose,Astrocytes,B lymphocytes not otherwise specified,Cardiomyocytes,CD56bright NK cells,Dendritic cells not otherwise specified,Dermis,Endothelial cells not otherwise specified,Epidermis,Fibroblasts,Heart,Hematopoietic progenitor cells,Hepatocytes,Keratinocytes,Kidney,Langerhans cells,Liver,Lung,Lymph node,Macrophages not otherwise specified,Mammary Gland,Mature monocyte-derived de…
hsa-miR-1178	miR-1178-3p (miRNAs w/seed UGCUCAC)	TargetScan Human	High (predicted)	ASPHD1	aspartate beta-hydroxylase domain containing 1	Cancer,Dermatological Diseases and Conditions,Endocrine System Disorders,Gastrointestinal Disease,Hematological Disease,Immunological Disease,Neurological Disease,Organismal Injury and Abnormalities	Other	other		Human,Rat	Adipocytes,Adipose,Astrocytes,B lymphocytes not otherwise specified,Cardiomyocytes,Crypt,Dermis,Endothelial cells not otherwise specified,Epidermis,Fibroblasts,Granulocytes not otherwise specified,Granulosa cells,Heart,Hepatocytes,Keratinocytes,Kidney,Langerhans cells,Liver,Lung,Macrophages not otherwise specified,Mammary Gland,Melanocytes,Microglia,Monocyte-derived macrophage,Other Cells,Other E…
hsa-miR-1178	miR-1178-3p (miRNAs w/seed UGCUCAC)	TargetScan Human	High (predicted)	ATP1B1	ATPase Na+/K+ transporting subunit beta 1	Cancer,Cardiovascular Disease,Connective Tissue Disorders,Dental Disease,Dermatological Diseases and Conditions,Developmental Disorder,Endocrine System Disorders,Gastrointestinal Disease,Hematological Disease,Hepatic System Disease,Hereditary Disorder,Immunological Disease,Infectious Disease,Inflammatory Disease,Inflammatory Response,Metabolic Disease,Neurological Disease,Organismal Injury and Ab…	Plasma Membrane	transporter	Mitochondrial Dysfunction	Human,Mouse,Rat	Adipocytes,Adipose,Amygdala,Astrocytes,B lymphocytes not otherwise specified,Bladder,Brain,Brainstem,Cardiomyocytes,Cerebellum,Cerebral Cortex,Choroid Plexus,Crypt,Cytotoxic T cells,Dendritic cells not otherwise specified,Dermis,Dorsal Root Ganglion,Effector T cells,Endothelial cells not otherwise specified,Epidermis,Epithelial cells not otherwise specified,Fibroblasts,Granule Cell Layer,Granule …
hsa-miR-1178	miR-1178-3p (miRNAs w/seed UGCUCAC)	TargetScan Human	High (predicted)	ATP5F1E	ATP synthase F1 subunit epsilon	Cancer,Developmental Disorder,Endocrine System Disorders,Hereditary Disorder,Metabolic Disease,Neurological Disease,Organismal Injury and Abnormalities,Psychological Disorders,Respiratory Disease,Skeletal and Muscular Disorders	Cytoplasm	transporter	Estrogen Receptor Signaling,Glucocorticoid Receptor Signaling,Huntington's Disease Signaling,Mitochondrial Dysfunction,Neutrophil Extracellular Trap Signaling Pathway,Oxidative Phosphorylation,S100 Family Signaling Pathway,Sirtuin Signaling Pathway	Human	Activated CD56bright NK cells,Activated CD56dim NK cells,Activated helper T cells,Activated Vd1 Gamma-delta T cells,Activated Vd2 Gamma-delta T cells,Adipocytes,Adipose,B lymphocytes not otherwise specified,BDCA-1+ dendritic cells,BDCA-3+ dendritic cells,CD56bright NK cells,CD56dim NK cells,Central memory cytotoxic T cells,Central memory helper T cells,Cytotoxic T cells,Dendritic cells not otherw…
hsa-miR-1178	miR-1178-3p (miRNAs w/seed UGCUCAC)	TargetScan Human	High (predicted)	C10orf82	chromosome 10 open reading frame 82	Cancer,Dermatological Diseases and Conditions,Endocrine System Disorders,Hematological Disease,Immunological Disease,Organismal Injury and Abnormalities	Other	other		Human,Mouse,Rat	Astrocytes,Cardiomyocytes,Crypt,Dermis,Endothelial cells not otherwise specified,Fibroblasts,Granulosa cells,Heart,Keratinocytes,Kidney,Macrophages not otherwise specified,Mammary Gland,Melanocytes,Other Cells,Other Epithelial cells,Other Nervous System,Other Neurons,Other Organ Systems,Ovary,Pancreas,Placenta,Prostate Gland,Sertoli cells,Skeletal Muscle,Skin,Smooth Muscle,Smooth muscle cells not…
hsa-miR-1178	miR-1178-3p (miRNAs w/seed UGCUCAC)	TargetScan Human	High (predicted)	C2orf69	chromosome 2 open reading frame 69	Cancer,Endocrine System Disorders,Gastrointestinal Disease,Hereditary Disorder,Metabolic Disease,Neurological Disease,Organismal Injury and Abnormalities	Cytoplasm	other		Human,Mouse,Rat	Activated helper T cells,Adipocytes,Adipose,Astrocytes,B lymphocytes not otherwise specified,BDCA-1+ dendritic cells,BDCA-3+ dendritic cells,Cardiomyocytes,Central memory cytotoxic T cells,Crypt,Dendritic cells not otherwise specified,Dermis,Effector memory cytotoxic T cells,Effector memory RA+ cytotoxic T cells,Endothelial cells not otherwise specified,Epidermis,Fibroblasts,Granulocytes not othe…
hsa-miR-1178	miR-1178-3p (miRNAs w/seed UGCUCAC)	TargetScan Human	High (predicted)	CABP4	calcium binding protein 4	Cancer,Dermatological Diseases and Conditions,Developmental Disorder,Endocrine System Disorders,Gastrointestinal Disease,Hepatic System Disease,Hereditary Disorder,Metabolic Disease,Neurological Disease,Ophthalmic Disease,Organismal Injury and Abnormalities,Respiratory Disease	Plasma Membrane	other		Human,Mouse,Rat	Adipocytes,Adipose,Astrocytes,B lymphocytes not otherwise specified,Brain,Cardiomyocytes,Crypt,Dendritic cells not otherwise specified,Dermis,Endothelial cells not otherwise specified,Epidermis,Fibroblasts,Granulosa cells,Heart,Hepatocytes,Keratinocytes,Kidney,Langerhans cells,Liver,Lung,Macrophages not otherwise specified,Mammary Gland,Melanocytes,Microglia,Monocytes not otherwise specified,NK c…
hsa-miR-1178	miR-1178-3p (miRNAs w/seed UGCUCAC)	TargetScan Human	High (predicted)	CASP3	caspase 3	Auditory Disease,Cancer,Cardiovascular Disease,Connective Tissue Disorders,Dermatological Diseases and Conditions,Developmental Disorder,Endocrine System Disorders,Gastrointestinal Disease,Hematological Disease,Hepatic System Disease,Hereditary Disorder,Immunological Disease,Infectious Disease,Inflammatory Disease,Inflammatory Response,Metabolic Disease,Neurological Disease,Ophthalmic Disease,Org…	Cytoplasm	peptidase	Adrenomedullin signaling pathway,Amyotrophic Lateral Sclerosis Signaling,Apoptosis Signaling,BAG2 Signaling Pathway,CD27 Signaling in Lymphocytes,Colorectal Cancer Metastasis Signaling,Coronavirus Pathogenesis Pathway,Cytotoxic T Lymphocyte-mediated Apoptosis of Target Cells,Death Receptor Signaling,DHCR24 Signaling Pathway,DNA damage-induced 14-3-3σ Signaling,Docosahexaenoic Acid (DHA) Signaling…	Human,Mouse,Rat	Activated CD56bright NK cells,Activated helper T cells,Activated Vd1 Gamma-delta T cells,Activated Vd2 Gamma-delta T cells,Adipocytes,Adipose,Amygdala,Astrocytes,B lymphocytes not otherwise specified,BDCA-1+ dendritic cells,BDCA-3+ dendritic cells,Bladder,Blood platelets,Brain,Cardiomyocytes,Central memory cytotoxic T cells,Central memory helper T cells,Cerebellum,Cerebral Cortex,Crypt,Cytotoxic …
hsa-miR-1178	miR-1178-3p (miRNAs w/seed UGCUCAC)	TargetScan Human	High (predicted)	CCDC146	coiled-coil domain containing 146	Cancer,Dermatological Diseases and Conditions,Endocrine System Disorders,Gastrointestinal Disease,Hematological Disease,Hepatic System Disease,Immunological Disease,Neurological Disease,Organismal Injury and Abnormalities,Reproductive System Disease	Cytoplasm	other		Human,Mouse,Rat	Adipocytes,Adipose,Astrocytes,B lymphocytes not otherwise specified,BDCA-1+ dendritic cells,BDCA-3+ dendritic cells,Cardiomyocytes,Crypt,Dendritic cells not otherwise specified,Dermis,Endothelial cells not otherwise specified,Epidermis,Fibroblasts,Granulocytes not otherwise specified,Granulosa cells,Heart,Hematopoietic progenitor cells,Hepatocytes,Immature monocyte-derived dendritic cells,Keratin…
hsa-miR-1178	miR-1178-3p (miRNAs w/seed UGCUCAC)	TargetScan Human	High (predicted)	CCR8	C-C motif chemokine receptor 8	Cancer,Dermatological Diseases and Conditions,Endocrine System Disorders,Gastrointestinal Disease,Hematological Disease,Hereditary Disorder,Immunological Disease,Infectious Disease,Inflammatory Disease,Inflammatory Response,Metabolic Disease,Neurological Disease,Organismal Injury and Abnormalities,Reproductive System Disease	Plasma Membrane	G-protein coupled receptor	Agranulocyte Adhesion and Diapedesis,Breast Cancer Regulation by Stathmin1,CREB Signaling in Neurons,FAK Signaling,G-Protein Coupled Receptor Signaling,Granulocyte Adhesion and Diapedesis,Phagosome Formation,S100 Family Signaling Pathway,Th1 and Th2 Activation Pathway,Th2 Pathway	Human,Mouse,Rat	Activated Vd1 Gamma-delta T cells,B lymphocytes not otherwise specified,Brain,CD56bright NK cells,Cerebral Cortex,Dendritic cells not otherwise specified,Endothelial cells not otherwise specified,Eosinophils,Epithelial cells not otherwise specified,Hematopoietic progenitor cells,Hippocampus,HUVEC cells,Immune cells not otherwise specified,Kidney,Large Intestine,Lung,Macrophages not otherwise spec…
hsa-miR-1178	miR-1178-3p (miRNAs w/seed UGCUCAC)	TargetScan Human	High (predicted)	CDK4	cyclin dependent kinase 4	Cancer,Cardiovascular Disease,Connective Tissue Disorders,Dermatological Diseases and Conditions,Developmental Disorder,Endocrine System Disorders,Gastrointestinal Disease,Hematological Disease,Hepatic System Disease,Hereditary Disorder,Immunological Disease,Infectious Disease,Inflammatory Response,Metabolic Disease,Neurological Disease,Ophthalmic Disease,Organismal Injury and Abnormalities,Psych…	Nucleus	kinase	Aryl Hydrocarbon Receptor Signaling,Bladder Cancer Signaling,Breast Cancer Regulation by Stathmin1,Cell Cycle Control of Chromosomal Replication,Cell Cycle Regulation by BTG Family Proteins,Cell Cycle: G1/S Checkpoint Regulation,Chronic Myeloid Leukemia Signaling,Coronavirus Pathogenesis Pathway,Cyclins and Cell Cycle Regulation,DNA Methylation and Transcriptional Repression Signaling,Estrogen-me…	Human,Mouse,Rat	Adipocytes,Adipose,Astrocytes,B lymphocytes not otherwise specified,Bladder,Brain,Cardiomyocytes,CD4+ T-lymphocytes,Cells not otherwise specified,Cerebral Cortex,Crypt,Cytotoxic T cells,Dendritic cells not otherwise specified,Dermis,Effector T cells,Endothelial cells not otherwise specified,Epidermis,Fibroblasts,Granulocytes not otherwise specified,Granulosa cells,Heart,Hematopoietic progenitor c…
hsa-miR-1178	miR-1178-3p (miRNAs w/seed UGCUCAC)	TargetScan Human	High (predicted)	CENPS/CENPS-CORT	centromere protein S	Cancer,Endocrine System Disorders,Gastrointestinal Disease,Neurological Disease,Organismal Injury and Abnormalities,Respiratory Disease	Nucleus	other		Human,Mouse,Rat	Activated CD56bright NK cells,Activated CD56dim NK cells,Activated helper T cells,Activated Vd1 Gamma-delta T cells,Activated Vd2 Gamma-delta T cells,Adipocytes,Adipose,Amygdala,B lymphocytes not otherwise specified,BDCA-1+ dendritic cells,BDCA-3+ dendritic cells,Central memory cytotoxic T cells,Central memory helper T cells,Cerebellum,Cerebral Cortex,Cytotoxic T cells,Dendritic cells not otherwi…
hsa-miR-1178	miR-1178-3p (miRNAs w/seed UGCUCAC)	TargetScan Human	High (predicted)	CEP126	centrosomal protein 126	Cancer,Dermatological Diseases and Conditions,Endocrine System Disorders,Gastrointestinal Disease,Hematological Disease,Hepatic System Disease,Immunological Disease,Organismal Injury and Abnormalities,Reproductive System Disease,Respiratory Disease	Cytoplasm	other		Human,Mouse,Rat	Activated helper T cells,Adipocytes,Adipose,B lymphocytes not otherwise specified,BDCA-1+ dendritic cells,BDCA-3+ dendritic cells,Cardiomyocytes,Central memory cytotoxic T cells,Crypt,Dendritic cells not otherwise specified,Effector memory cytotoxic T cells,Effector memory RA+ cytotoxic T cells,Endothelial cells not otherwise specified,Fibroblasts,Granulosa cells,Heart,Hematopoietic progenitor ce…
hsa-miR-1178	miR-1178-3p (miRNAs w/seed UGCUCAC)	TargetScan Human	High (predicted)	CFAP251	cilia and flagella associated protein 251	Endocrine System Disorders,Hereditary Disorder,Organismal Injury and Abnormalities,Reproductive System Disease	Cytoplasm	other		Human,Mouse,Rat	Adipocytes,Adipose,B lymphocytes not otherwise specified,Cardiomyocytes,Dendritic cells not otherwise specified,Endothelial cells not otherwise specified,Fibroblasts,Heart,Lung,Macrophages not otherwise specified,Other Cells,Other Epithelial cells,Other Nervous System,Placenta,Plasma cells,Smooth Muscle,Smooth muscle cells not otherwise specified,Testis,Thymus,DU-145,HOP-92,J774,K-562,LOX IMVI,NC…
hsa-miR-1178	miR-1178-3p (miRNAs w/seed UGCUCAC)	TargetScan Human	High (predicted)	CHST14	carbohydrate sulfotransferase 14	Cancer,Connective Tissue Disorders,Dermatological Diseases and Conditions,Developmental Disorder,Endocrine System Disorders,Gastrointestinal Disease,Hepatic System Disease,Hereditary Disorder,Infectious Disease,Metabolic Disease,Organismal Injury and Abnormalities,Reproductive System Disease,Skeletal and Muscular Disorders	Cytoplasm	enzyme	Dermatan Sulfate Biosynthesis,Dermatan Sulfate Biosynthesis (Late Stages)	Human,Mouse,Rat	Activated helper T cells,Adipocytes,Adipose,Astrocytes,B lymphocytes not otherwise specified,BDCA-1+ dendritic cells,BDCA-3+ dendritic cells,Cardiomyocytes,Crypt,Dendritic cells not otherwise specified,Dermis,Effector memory cytotoxic T cells,Effector memory RA+ cytotoxic T cells,Endothelial cells not otherwise specified,Epidermis,Fibroblasts,Granulocytes not otherwise specified,Granulosa cells,H…
hsa-miR-1178	miR-1178-3p (miRNAs w/seed UGCUCAC)	TargetScan Human	High (predicted)	CLEC4A	C-type lectin domain family 4 member A	Cancer,Cardiovascular Disease,Connective Tissue Disorders,Dermatological Diseases and Conditions,Endocrine System Disorders,Gastrointestinal Disease,Hematological Disease,Hepatic System Disease,Hypersensitivity Response,Immunological Disease,Infectious Disease,Inflammatory Disease,Inflammatory Response,Metabolic Disease,Neurological Disease,Organismal Injury and Abnormalities,Reproductive System …	Plasma Membrane	transmembrane receptor		Human,Mouse,Rat	Activated Vd1 Gamma-delta T cells,Activated Vd2 Gamma-delta T cells,Adipocytes,Adipose,Astrocytes,B lymphocytes not otherwise specified,BDCA-1+ dendritic cells,BDCA-3+ dendritic cells,Cardiomyocytes,Central memory cytotoxic T cells,Central memory helper T cells,Crypt,Cytotoxic T cells,Dendritic cells not otherwise specified,Dermis,Effector memory cytotoxic T cells,Effector memory helper T cells,E…
hsa-miR-1178	miR-1178-3p (miRNAs w/seed UGCUCAC)	TargetScan Human	High (predicted)	CXCL6	C-X-C motif chemokine ligand 6	Cancer,Cardiovascular Disease,Connective Tissue Disorders,Dermatological Diseases and Conditions,Developmental Disorder,Endocrine System Disorders,Gastrointestinal Disease,Hematological Disease,Hepatic System Disease,Hereditary Disorder,Hypersensitivity Response,Immunological Disease,Infectious Disease,Inflammatory Disease,Inflammatory Response,Metabolic Disease,Neurological Disease,Ophthalmic Di…	Extracellular Space	cytokine	Agranulocyte Adhesion and Diapedesis,Granulocyte Adhesion and Diapedesis,IL-13 Signaling Pathway,IL-17A Signaling in Airway Cells,Pathogen Induced Cytokine Storm Signaling Pathway,Role of IL-17A in Arthritis,Role of IL-17A in Psoriasis,Role of IL-17F in Allergic Inflammatory Airway Diseases	Human,Mouse,Rat	Activated CD56dim NK cells,B lymphocytes not otherwise specified,Brain,Cardiomyocytes,CD56dim NK cells,Cerebral Cortex,Dermis,Effector memory helper T cells,Endothelial cells not otherwise specified,Epidermis,Fibroblasts,Granulosa cells,Heart,Hepatocytes,Keratinocytes,Kidney,Langerhans cells,Liver,Lung,Macrophages not otherwise specified,Mammary Gland,Mature monocyte-derived dendritic cells,Micro…
hsa-miR-1178	miR-1178-3p (miRNAs w/seed UGCUCAC)	TargetScan Human	High (predicted)	CYP4B1	cytochrome P450 family 4 subfamily B member 1	Cancer,Dermatological Diseases and Conditions,Endocrine System Disorders,Gastrointestinal Disease,Hematological Disease,Immunological Disease,Infectious Disease,Organismal Injury and Abnormalities	Cytoplasm	enzyme	Acetone Degradation I (to Methylglyoxal),Bupropion Degradation,Estrogen Biosynthesis,Melatonin Degradation I,Nicotine Degradation II,Nicotine Degradation III,Superpathway of Melatonin Degradation	Human,Mouse,Rat	Adipocytes,Adipose,Cardiomyocytes,Dermis,Endothelial cells not otherwise specified,Epidermis,Fibroblasts,Granulocytes not otherwise specified,Heart,Keratinocytes,Kidney,Langerhans cells,Large Intestine,Liver,Lung,Lymphocytes not otherwise specified,Macrophages not otherwise specified,Mammary Gland,Other Cells,Other Epithelial cells,Other Nervous System,Other Neurons,Other Organ Systems,Other Tiss…
hsa-miR-1178	miR-1178-3p (miRNAs w/seed UGCUCAC)	TargetScan Human	High (predicted)	DCLRE1B	DNA cross-link repair 1B	Cancer,Dermatological Diseases and Conditions,Developmental Disorder,Gastrointestinal Disease,Hereditary Disorder,Neurological Disease,Organismal Injury and Abnormalities	Nucleus	enzyme		Human,Mouse,Rat	Activated helper T cells,Adipocytes,Adipose,Astrocytes,B lymphocytes not otherwise specified,BDCA-3+ dendritic cells,Cardiomyocytes,Crypt,Dendritic cells not otherwise specified,Dermis,Effector memory cytotoxic T cells,Effector memory RA+ cytotoxic T cells,Endothelial cells not otherwise specified,Epidermis,Fibroblasts,Granulocytes not otherwise specified,Granulosa cells,Heart,Hematopoietic proge…
hsa-miR-1178	miR-1178-3p (miRNAs w/seed UGCUCAC)	TargetScan Human	High (predicted)	DNAH6	dynein axonemal heavy chain 6	Cancer,Cardiovascular Disease,Dermatological Diseases and Conditions,Developmental Disorder,Endocrine System Disorders,Gastrointestinal Disease,Hematological Disease,Hepatic System Disease,Immunological Disease,Neurological Disease,Organismal Injury and Abnormalities,Renal and Urological Disease,Reproductive System Disease,Respiratory Disease,Skeletal and Muscular Disorders	Extracellular Space	other		Human,Mouse,Rat	Adipocytes,Adipose,Astrocytes,B lymphocytes not otherwise specified,Cardiomyocytes,Crypt,Dendritic cells not otherwise specified,Dermis,Endothelial cells not otherwise specified,Fibroblasts,Granulosa cells,Heart,Hematopoietic progenitor cells,Hepatocytes,Keratinocytes,Kidney,Langerhans cells,Liver,Lung,Macrophages not otherwise specified,Mammary Gland,Melanocytes,Microglia,Other Cells,Other Epith…
hsa-miR-1178	miR-1178-3p (miRNAs w/seed UGCUCAC)	TargetScan Human	High (predicted)	DNAJC6	DnaJ heat shock protein family (Hsp40) member C6	Auditory Disease,Cancer,Dermatological Diseases and Conditions,Endocrine System Disorders,Gastrointestinal Disease,Hereditary Disorder,Metabolic Disease,Neurological Disease,Organismal Injury and Abnormalities,Psychological Disorders,Renal and Urological Disease,Reproductive System Disease,Respiratory Disease,Skeletal and Muscular Disorders	Cytoplasm	other	Aldosterone Signaling in Epithelial Cells,NRF2-mediated Oxidative Stress Response,Protein Ubiquitination Pathway,Unfolded protein response	Human,Mouse,Rat	Adipocytes,Adipose,Amygdala,Astrocytes,B lymphocytes not otherwise specified,Cardiomyocytes,Cerebellum,Cerebral Cortex,Crypt,Dendritic cells not otherwise specified,Dermis,Dorsal Root Ganglion,Endothelial cells not otherwise specified,Epidermis,Fibroblasts,Granulosa cells,Heart,Hematopoietic progenitor cells,Hepatocytes,Hippocampus,Hypothalamus,Keratinocytes,Kidney,Langerhans cells,Liver,Lung,Mac…
hsa-miR-1178	miR-1178-3p (miRNAs w/seed UGCUCAC)	TargetScan Human	High (predicted)	EDNRA	endothelin receptor type A	Auditory Disease,Cancer,Cardiovascular Disease,Connective Tissue Disorders,Dermatological Diseases and Conditions,Developmental Disorder,Endocrine System Disorders,Gastrointestinal Disease,Hematological Disease,Hepatic System Disease,Hereditary Disorder,Immunological Disease,Infectious Disease,Inflammatory Disease,Inflammatory Response,Metabolic Disease,Neurological Disease,Organismal Injury and …	Plasma Membrane	transmembrane receptor	Breast Cancer Regulation by Stathmin1,Cardiac Hypertrophy Signaling (Enhanced),CREB Signaling in Neurons,Endothelin-1 Signaling,FAK Signaling,G-Protein Coupled Receptor Signaling,Hepatic Fibrosis / Hepatic Stellate Cell Activation,Hepatic Fibrosis Signaling Pathway,Ovarian Cancer Signaling,Phagosome Formation,Pulmonary Fibrosis Idiopathic Signaling Pathway,S100 Family Signaling Pathway	Human,Mouse,Rat	Adipocytes,Adipose,Adrenal Gland,Astrocytes,Beta islet cells,Brain,Cardiomyocytes,Crypt,Dendritic cells not otherwise specified,Dermis,Endothelial cells not otherwise specified,Epidermis,Fibroblasts,Granulosa cells,Heart,Keratinocytes,Kidney,Langerhans cells,Large Intestine,Liver,Lung,Macrophages not otherwise specified,Mammary Gland,Melanocytes,Microglia,Neurons not otherwise specified,Other Cel…
hsa-miR-1178	miR-1178-3p (miRNAs w/seed UGCUCAC)	TargetScan Human	High (predicted)	EIF1B	eukaryotic translation initiation factor 1B	Cancer,Cardiovascular Disease,Connective Tissue Disorders,Gastrointestinal Disease,Immunological Disease,Inflammatory Disease,Inflammatory Response,Organismal Injury and Abnormalities,Reproductive System Disease,Skeletal and Muscular Disorders	Cytoplasm	translation regulator		Human,Mouse,Rat	Activated CD56bright NK cells,Activated CD56dim NK cells,Activated helper T cells,Activated Vd1 Gamma-delta T cells,Activated Vd2 Gamma-delta T cells,Adipocytes,Adipose,Amygdala,Astrocytes,B lymphocytes not otherwise specified,BDCA-1+ dendritic cells,BDCA-3+ dendritic cells,Bladder,Cardiomyocytes,CD56bright NK cells,CD56dim NK cells,Central memory cytotoxic T cells,Central memory helper T cells,C…
hsa-miR-1178	miR-1178-3p (miRNAs w/seed UGCUCAC)	TargetScan Human	High (predicted)	ELAPOR2	endosome-lysosome associated apoptosis and autophagy regulator family member 2		Plasma Membrane	other		Human,Mouse,Rat	Activated helper T cells,Adipocytes,Adipose,B lymphocytes not otherwise specified,BDCA-1+ dendritic cells,BDCA-3+ dendritic cells,Cardiomyocytes,Central memory cytotoxic T cells,Dendritic cells not otherwise specified,Dorsal Root Ganglion,Effector memory cytotoxic T cells,Effector memory RA+ cytotoxic T cells,Endothelial cells not otherwise specified,Fibroblasts,Heart,Hypothalamus,Immature monocy…
hsa-miR-1178	miR-1178-3p (miRNAs w/seed UGCUCAC)	TargetScan Human	High (predicted)	ELK4	ETS transcription factor ELK4	Cancer,Dermatological Diseases and Conditions,Endocrine System Disorders,Gastrointestinal Disease,Hepatic System Disease,Organismal Injury and Abnormalities,Reproductive System Disease	Nucleus	transcription regulator	ERK5 Signaling,RAC Signaling	Human,Mouse,Rat	Activated CD56bright NK cells,Activated Vd1 Gamma-delta T cells,Activated Vd2 Gamma-delta T cells,Adipocytes,Adipose,Amygdala,Astrocytes,B lymphocytes not otherwise specified,BDCA-1+ dendritic cells,BDCA-3+ dendritic cells,Bladder,Brain,Cardiomyocytes,Central memory cytotoxic T cells,Cerebellum,Cerebral Cortex,Crypt,Cytotoxic T cells,Dendritic cells not otherwise specified,Dermis,Dorsal Root Gang…
hsa-miR-1178	miR-1178-3p (miRNAs w/seed UGCUCAC)	TargetScan Human	High (predicted)	EPPIN	epididymal peptidase inhibitor	Antimicrobial Response,Cancer,Dermatological Diseases and Conditions,Gastrointestinal Disease,Hepatic System Disease,Inflammatory Response,Organismal Injury and Abnormalities	Extracellular Space	other		Human,Mouse,Rat	Activated Vd1 Gamma-delta T cells,Cardiomyocytes,CD56bright NK cells,CD56dim NK cells,Central memory helper T cells,Effector memory helper T cells,Endothelial cells not otherwise specified,Granulosa cells,Heart,Kidney,Macrophages not otherwise specified,Mammary Gland,Neutrophils,Other Cells,Other Epithelial cells,Other Organ Systems,Ovary,Prostate Gland,Sertoli cells,Smooth Muscle,Smooth muscle c…
hsa-miR-1178	miR-1178-3p (miRNAs w/seed UGCUCAC)	TargetScan Human	High (predicted)	EPPIN-WFDC6	EPPIN-WFDC6 readthrough	Cancer,Dermatological Diseases and Conditions,Gastrointestinal Disease,Hepatic System Disease,Organismal Injury and Abnormalities	Extracellular Space	other		Human,Mouse,Rat	Fibroblasts,Granulosa cells,Other Cells,Other Epithelial cells,Other Organ Systems,Ovary,Testis,Uterus
hsa-miR-1178	miR-1178-3p (miRNAs w/seed UGCUCAC)	TargetScan Human	High (predicted)	ERG28	ergosterol biosynthesis 28 homolog	Cancer,Gastrointestinal Disease,Organismal Injury and Abnormalities	Cytoplasm	other		Human,Mouse,Rat	Activated Vd1 Gamma-delta T cells,Adipocytes,Adipose,Amygdala,B lymphocytes not otherwise specified,Bladder,CD56bright NK cells,Central memory cytotoxic T cells,Central memory helper T cells,Cerebellum,Cerebral Cortex,Cytotoxic T cells,Dendritic cells not otherwise specified,Dorsal Root Ganglion,Effector memory cytotoxic T cells,Effector memory RA+ cytotoxic T cells,Effector T cells,Endothelial c…
hsa-miR-1178	miR-1178-3p (miRNAs w/seed UGCUCAC)	TargetScan Human	High (predicted)	FAM106A	family with sequence similarity 106 member A		Other	other		Human	Activated Vd1 Gamma-delta T cells,Activated Vd2 Gamma-delta T cells,BDCA-1+ dendritic cells,Monocyte-derived macrophage,Naive helper T cells,Plasmacytoid dendritic cells,Th1 cells,Th2 cells,Vd1 Gamma-delta T cells,Vd2 Gamma-delta T cells,THP-1
hsa-miR-1178	miR-1178-3p (miRNAs w/seed UGCUCAC)	TargetScan Human	High (predicted)	GNAS	GNAS complex locus	Auditory Disease,Cancer,Cardiovascular Disease,Connective Tissue Disorders,Dermatological Diseases and Conditions,Developmental Disorder,Endocrine System Disorders,Gastrointestinal Disease,Hematological Disease,Hepatic System Disease,Hereditary Disorder,Immunological Disease,Inflammatory Disease,Inflammatory Response,Metabolic Disease,Neurological Disease,Nutritional Disease,Organismal Injury and…	Plasma Membrane	enzyme	Adrenomedullin signaling pathway,AMPK Signaling,Androgen Signaling,Apelin Endothelial Signaling Pathway,Apelin Muscle Signaling Pathway,Axonal Guidance Signaling,cAMP-mediated signaling,Cardiac Hypertrophy Signaling,Cardiac Hypertrophy Signaling (Enhanced),Cardiac β-adrenergic Signaling,CCR3 Signaling in Eosinophils,CCR5 Signaling in Macrophages,CDK5 Signaling,Cellular Effects of Sildenafil (Viag…	Human,Mouse,Rat	Activated CD56bright NK cells,Activated CD56dim NK cells,Activated helper T cells,Activated Vd1 Gamma-delta T cells,Activated Vd2 Gamma-delta T cells,Adipocytes,Adipose,Adrenal Gland,Amygdala,Astrocytes,B lymphocytes not otherwise specified,BDCA-1+ dendritic cells,BDCA-3+ dendritic cells,Bladder,Blood platelets,Bone marrow-derived macrophages,Brain,Brainstem,Cardiomyocytes,CD56bright NK cells,CD5…
hsa-miR-1178	miR-1178-3p (miRNAs w/seed UGCUCAC)	TargetScan Human	High (predicted)	GSAP	gamma-secretase activating protein	Cancer,Dermatological Diseases and Conditions,Endocrine System Disorders,Gastrointestinal Disease,Hepatic System Disease,Neurological Disease,Organismal Injury and Abnormalities	Cytoplasm	peptidase		Human,Mouse,Rat	Adipocytes,Adipose,Astrocytes,B lymphocytes not otherwise specified,BDCA-1+ dendritic cells,BDCA-3+ dendritic cells,Cardiomyocytes,Cerebellum,Crypt,Cytotoxic T cells,Dendritic cells not otherwise specified,Dermis,Dorsal Root Ganglion,Effector T cells,Endothelial cells not otherwise specified,Epidermis,Fibroblasts,Granulocytes not otherwise specified,Granulosa cells,Heart,Hematopoietic progenitor …
hsa-miR-1178	miR-1178-3p (miRNAs w/seed UGCUCAC)	TargetScan Human	High (predicted)	HARS2	histidyl-tRNA synthetase 2, mitochondrial	Auditory Disease,Cancer,Dermatological Diseases and Conditions,Developmental Disorder,Endocrine System Disorders,Gastrointestinal Disease,Hereditary Disorder,Neurological Disease,Organismal Injury and Abnormalities,Reproductive System Disease,Respiratory Disease	Cytoplasm	enzyme	tRNA Charging	Human,Mouse,Rat	Activated CD56bright NK cells,Activated helper T cells,Activated Vd1 Gamma-delta T cells,Activated Vd2 Gamma-delta T cells,Adipocytes,Adipose,Astrocytes,B lymphocytes not otherwise specified,BDCA-1+ dendritic cells,BDCA-3+ dendritic cells,Cardiomyocytes,Central memory cytotoxic T cells,Central memory helper T cells,Cerebellum,Crypt,Cytotoxic T cells,Dendritic cells not otherwise specified,Dermis,…
hsa-miR-1178	miR-1178-3p (miRNAs w/seed UGCUCAC)	TargetScan Human	High (predicted)	HERPUD1	homocysteine inducible ER protein with ubiquitin like domain 1	Cancer,Dermatological Diseases and Conditions,Endocrine System Disorders,Gastrointestinal Disease,Hepatic System Disease,Hereditary Disorder,Infectious Disease,Neurological Disease,Organismal Injury and Abnormalities,Psychological Disorders,Reproductive System Disease,Skeletal and Muscular Disorders	Cytoplasm	other	NRF2-mediated Oxidative Stress Response	Human,Mouse,Rat	Adipocytes,Adipose,Amygdala,Astrocytes,B lymphocytes not otherwise specified,Bladder,Brain,Cardiomyocytes,Cerebellum,Cerebral Cortex,Crypt,Cytotoxic T cells,Dendritic cells not otherwise specified,Dermis,Dorsal Root Ganglion,Effector T cells,Endothelial cells not otherwise specified,Epidermis,Fibroblasts,Granulocytes not otherwise specified,Granulosa cells,Heart,Hematopoietic progenitor cells,Hep…
hsa-miR-1178	miR-1178-3p (miRNAs w/seed UGCUCAC)	TargetScan Human	High (predicted)	HSCB	HscB mitochondrial iron-sulfur cluster cochaperone	Cancer,Cardiovascular Disease,Dermatological Diseases and Conditions,Developmental Disorder,Endocrine System Disorders,Gastrointestinal Disease,Hematological Disease,Hereditary Disorder,Organismal Injury and Abnormalities	Cytoplasm	other	Aldosterone Signaling in Epithelial Cells,Iron homeostasis signaling pathway,Protein Ubiquitination Pathway	Human,Mouse,Rat	Adipocytes,Adipose,Astrocytes,B lymphocytes not otherwise specified,Bladder,Cardiomyocytes,Crypt,Cytotoxic T cells,Dendritic cells not otherwise specified,Dermis,Effector T cells,Endothelial cells not otherwise specified,Epidermis,Fibroblasts,Granulocytes not otherwise specified,Granulosa cells,Heart,Hematopoietic progenitor cells,Hepatocytes,Keratinocytes,Kidney,Langerhans cells,Large Intestine,…
hsa-miR-1178	miR-1178-3p (miRNAs w/seed UGCUCAC)	TargetScan Human	High (predicted)	KCNG1	potassium voltage-gated channel modifier subfamily G member 1	Cancer,Dermatological Diseases and Conditions,Developmental Disorder,Endocrine System Disorders,Gastrointestinal Disease,Hematological Disease,Hepatic System Disease,Hereditary Disorder,Immunological Disease,Infectious Disease,Neurological Disease,Organismal Injury and Abnormalities,Reproductive System Disease,Skeletal and Muscular Disorders	Plasma Membrane	ion channel		Human,Mouse,Rat	Adipocytes,Adipose,Astrocytes,B lymphocytes not otherwise specified,Cardiomyocytes,Crypt,Dermis,Endothelial cells not otherwise specified,Epidermis,Fibroblasts,Granulosa cells,Heart,Hepatocytes,Keratinocytes,Kidney,Langerhans cells,Liver,Lung,Macrophages not otherwise specified,Mammary Gland,Microglia,Naive B cells,NK cells not otherwise specified,Other Cells,Other Epithelial cells,Other Nervous …
hsa-miR-1178	miR-1178-3p (miRNAs w/seed UGCUCAC)	TargetScan Human	High (predicted)	KLRG1	killer cell lectin like receptor G1	Cancer,Endocrine System Disorders,Gastrointestinal Disease,Inflammatory Response,Organismal Injury and Abnormalities,Reproductive System Disease,Respiratory Disease	Plasma Membrane	other		Human,Mouse,Rat	Activated Vd1 Gamma-delta T cells,Activated Vd2 Gamma-delta T cells,Adipocytes,Adipose,Astrocytes,B lymphocytes not otherwise specified,Cardiomyocytes,Central memory cytotoxic T cells,Central memory helper T cells,Crypt,Cytotoxic T cells,Dendritic cells not otherwise specified,Dermis,Effector memory cytotoxic T cells,Effector memory helper T cells,Effector memory RA+ cytotoxic T cells,Effector T …
hsa-miR-1178	miR-1178-3p (miRNAs w/seed UGCUCAC)	TargetScan Human	High (predicted)	KRTAP5-11	keratin associated protein 5-11	Cancer,Dermatological Diseases and Conditions,Endocrine System Disorders,Gastrointestinal Disease,Hepatic System Disease,Organismal Injury and Abnormalities,Reproductive System Disease	Cytoplasm	other		Human	Cardiomyocytes,Granulosa cells,Heart,Kidney,Mammary Gland,Other Nervous System,Other Neurons,Ovary,Placenta,MALME-3M,MDA-MB-231
hsa-miR-1178	miR-1178-3p (miRNAs w/seed UGCUCAC)	TargetScan Human	High (predicted)	LMCD1	LIM and cysteine rich domains 1	Cancer,Cardiovascular Disease,Developmental Disorder,Gastrointestinal Disease,Hepatic System Disease,Hereditary Disorder,Inflammatory Disease,Neurological Disease,Organismal Injury and Abnormalities,Psychological Disorders,Reproductive System Disease,Respiratory Disease,Skeletal and Muscular Disorders	Cytoplasm	transcription regulator		Human,Mouse,Rat	Adipocytes,Adipose,Astrocytes,B lymphocytes not otherwise specified,Bladder,Cardiomyocytes,Crypt,Dendritic cells not otherwise specified,Dermis,Endothelial cells not otherwise specified,Epidermis,Fibroblasts,Granulocytes not otherwise specified,Granulosa cells,Heart,Hepatocytes,Keratinocytes,Kidney,Langerhans cells,Liver,Lung,Macrophages not otherwise specified,Mammary Gland,Melanocytes,Microglia…
hsa-miR-1178	miR-1178-3p (miRNAs w/seed UGCUCAC)	TargetScan Human	High (predicted)	LOC150935	uncharacterized LOC150935		Other	other		Human
hsa-miR-1178	miR-1178-3p (miRNAs w/seed UGCUCAC)	TargetScan Human	High (predicted)	LOC284379	solute carrier family 7 member 3 pseudogene		Other	other		Human
hsa-miR-1178	miR-1178-3p (miRNAs w/seed UGCUCAC)	TargetScan Human	High (predicted)	MMGT1	membrane magnesium transporter 1	Cancer,Dermatological Diseases and Conditions,Endocrine System Disorders,Gastrointestinal Disease,Organismal Injury and Abnormalities	Cytoplasm	transporter		Human,Mouse,Rat	Activated helper T cells,Adipocytes,Adipose,Amygdala,Astrocytes,B lymphocytes not otherwise specified,BDCA-1+ dendritic cells,BDCA-3+ dendritic cells,Bladder,Cardiomyocytes,Central memory cytotoxic T cells,Cerebellum,Cerebral Cortex,Crypt,Cytotoxic T cells,Dendritic cells not otherwise specified,Dermis,Dorsal Root Ganglion,Effector memory cytotoxic T cells,Effector memory RA+ cytotoxic T cells,Ef…
hsa-miR-1178	miR-1178-3p (miRNAs w/seed UGCUCAC)	TargetScan Human	High (predicted)	MRAP2	melanocortin 2 receptor accessory protein 2	Cancer,Dermatological Diseases and Conditions,Endocrine System Disorders,Gastrointestinal Disease,Hepatic System Disease,Hereditary Disorder,Metabolic Disease,Neurological Disease,Nutritional Disease,Organismal Injury and Abnormalities,Psychological Disorders	Cytoplasm	other		Human,Mouse,Rat	Adipocytes,Adipose,Astrocytes,Cardiomyocytes,Crypt,Dendritic cells not otherwise specified,Dermis,Endothelial cells not otherwise specified,Epidermis,Fibroblasts,Granulosa cells,Heart,Keratinocytes,Kidney,Langerhans cells,Lung,Macrophages not otherwise specified,Mammary Gland,Microglia,Other Cells,Other Epithelial cells,Other Nervous System,Other Neurons,Other Organ Systems,Ovary,Pancreas,Placent…
hsa-miR-1178	miR-1178-3p (miRNAs w/seed UGCUCAC)	TargetScan Human	High (predicted)	MREG	melanoregulin	Cancer,Dermatological Diseases and Conditions,Endocrine System Disorders,Gastrointestinal Disease,Hereditary Disorder,Inflammatory Response,Neurological Disease,Organismal Injury and Abnormalities,Reproductive System Disease	Cytoplasm	other		Human,Mouse,Rat	Activated CD56bright NK cells,Activated CD56dim NK cells,Activated helper T cells,Activated Vd1 Gamma-delta T cells,Activated Vd2 Gamma-delta T cells,Adipocytes,Adipose,Astrocytes,B lymphocytes not otherwise specified,BDCA-3+ dendritic cells,Brain,Cardiomyocytes,CD56bright NK cells,CD56dim NK cells,Central memory cytotoxic T cells,Central memory helper T cells,Crypt,Cytotoxic T cells,Dendritic ce…
hsa-miR-1178	miR-1178-3p (miRNAs w/seed UGCUCAC)	TargetScan Human	High (predicted)	MRGPRF	MAS related GPR family member F	Cancer,Cardiovascular Disease,Dermatological Diseases and Conditions,Endocrine System Disorders,Gastrointestinal Disease,Organismal Injury and Abnormalities,Reproductive System Disease	Plasma Membrane	G-protein coupled receptor		Human,Mouse,Rat	Adipocytes,Adipose,B lymphocytes not otherwise specified,Brain,Cardiomyocytes,Cerebellum,Dendritic cells not otherwise specified,Dermis,Endothelial cells not otherwise specified,Epidermis,Fibroblasts,Heart,Hepatocytes,Keratinocytes,Kidney,Langerhans cells,Large Intestine,Liver,Macrophages not otherwise specified,Mammary Gland,Melanocytes,Microglia,Other Cells,Other Epithelial cells,Other Nervous …
hsa-miR-1178	miR-1178-3p (miRNAs w/seed UGCUCAC)	TargetScan Human	High (predicted)	MRPS16	mitochondrial ribosomal protein S16	Cancer,Developmental Disorder,Gastrointestinal Disease,Hematological Disease,Hepatic System Disease,Hereditary Disorder,Immunological Disease,Metabolic Disease,Neurological Disease,Organismal Injury and Abnormalities	Cytoplasm	other		Human,Mouse,Rat	Activated helper T cells,Adipocytes,Adipose,Amygdala,Astrocytes,B lymphocytes not otherwise specified,BDCA-1+ dendritic cells,BDCA-3+ dendritic cells,Bladder,Cardiomyocytes,Central memory cytotoxic T cells,Cerebellum,Cerebral Cortex,Crypt,Cytotoxic T cells,Dendritic cells not otherwise specified,Dermis,Dorsal Root Ganglion,Effector memory cytotoxic T cells,Effector memory RA+ cytotoxic T cells,Ef…
hsa-miR-1178	miR-1178-3p (miRNAs w/seed UGCUCAC)	TargetScan Human	High (predicted)	NAT8L	N-acetyltransferase 8 like	Cancer,Connective Tissue Disorders,Developmental Disorder,Endocrine System Disorders,Gastrointestinal Disease,Hematological Disease,Hereditary Disorder,Immunological Disease,Metabolic Disease,Neurological Disease,Organismal Injury and Abnormalities,Psychological Disorders,Skeletal and Muscular Disorders	Cytoplasm	enzyme		Human,Mouse,Rat	Adipocytes,Adipose,Amygdala,Astrocytes,B lymphocytes not otherwise specified,Brain,Cardiomyocytes,Cerebellum,Cerebral Cortex,Cytotoxic T cells,Dendritic cells not otherwise specified,Dermis,Dorsal Root Ganglion,Effector T cells,Endothelial cells not otherwise specified,Epidermis,Fibroblasts,Granulosa cells,Heart,Hippocampus,Hypothalamus,Keratinocytes,Kidney,Langerhans cells,Large Intestine,Liver,…
hsa-miR-1178	miR-1178-3p (miRNAs w/seed UGCUCAC)	TargetScan Human	High (predicted)	NDUFS6	NADH:ubiquinone oxidoreductase subunit S6	Cancer,Cardiovascular Disease,Developmental Disorder,Endocrine System Disorders,Gastrointestinal Disease,Hepatic System Disease,Hereditary Disorder,Infectious Disease,Metabolic Disease,Neurological Disease,Organismal Injury and Abnormalities,Psychological Disorders,Renal and Urological Disease,Respiratory Disease,Skeletal and Muscular Disorders	Cytoplasm	enzyme	Estrogen Receptor Signaling,Glucocorticoid Receptor Signaling,Granzyme A Signaling,Mitochondrial Dysfunction,Neutrophil Extracellular Trap Signaling Pathway,Oxidative Phosphorylation,Sirtuin Signaling Pathway	Human,Mouse,Rat	Activated CD56bright NK cells,Activated CD56dim NK cells,Activated helper T cells,Activated Vd1 Gamma-delta T cells,Activated Vd2 Gamma-delta T cells,Adipocytes,Adipose,Amygdala,Astrocytes,B lymphocytes not otherwise specified,BDCA-1+ dendritic cells,BDCA-3+ dendritic cells,Bladder,Cardiomyocytes,CD56bright NK cells,CD56dim NK cells,Central memory cytotoxic T cells,Central memory helper T cells,C…
hsa-miR-1178	miR-1178-3p (miRNAs w/seed UGCUCAC)	TargetScan Human	High (predicted)	NEU3	neuraminidase 3	Cancer,Developmental Disorder,Endocrine System Disorders,Gastrointestinal Disease,Metabolic Disease,Neurological Disease,Nutritional Disease,Organismal Injury and Abnormalities,Skeletal and Muscular Disorders	Plasma Membrane	enzyme		Human,Mouse,Rat	Adipocytes,Adipose,Astrocytes,B lymphocytes not otherwise specified,Brain,Cardiomyocytes,CD56dim NK cells,Cerebellum,Cerebral Cortex,Crypt,Dendritic cells not otherwise specified,Dermis,Endothelial cells not otherwise specified,Epidermis,Fibroblasts,Granule cells,Granulocytes not otherwise specified,Granulosa cells,Heart,Hematopoietic progenitor cells,Hepatocytes,Keratinocytes,Kidney,Langerhans c…
hsa-miR-1178	miR-1178-3p (miRNAs w/seed UGCUCAC)	TargetScan Human	High (predicted)	NPTN	neuroplastin	Cancer,Developmental Disorder,Endocrine System Disorders,Gastrointestinal Disease,Neurological Disease,Organismal Injury and Abnormalities,Reproductive System Disease	Plasma Membrane	other		Human,Rat	Adipocytes,Adipose,Astrocytes,B lymphocytes not otherwise specified,Cardiomyocytes,Crypt,Dendritic cells not otherwise specified,Dermis,Endothelial cells not otherwise specified,Epidermis,Fibroblasts,Granulocytes not otherwise specified,Granulosa cells,Heart,Hematopoietic progenitor cells,Hepatocytes,Keratinocytes,Kidney,Langerhans cells,Liver,Lung,Macrophages not otherwise specified,Mammary Glan…
hsa-miR-1178	miR-1178-3p (miRNAs w/seed UGCUCAC)	TargetScan Human	High (predicted)	OCLN	occludin	Auditory Disease,Cancer,Cardiovascular Disease,Connective Tissue Disorders,Dermatological Diseases and Conditions,Developmental Disorder,Endocrine System Disorders,Gastrointestinal Disease,Hematological Disease,Hepatic System Disease,Hereditary Disorder,Immunological Disease,Infectious Disease,Inflammatory Disease,Inflammatory Response,Neurological Disease,Nutritional Disease,Organismal Injury an…	Plasma Membrane	other	Regulation Of The Epithelial Mesenchymal Transition By Growth Factors Pathway,S100 Family Signaling Pathway,Serotonin Receptor Signaling,Sertoli Cell-Sertoli Cell Junction Signaling,Tight Junction Signaling	Human,Mouse,Rat	Adipocytes,Adipose,Adrenal Gland,Astrocytes,B lymphocytes not otherwise specified,Bladder,Brain,Cardiomyocytes,CD56bright NK cells,Cerebellum,Cerebral Cortex,Crypt,Dendritic cells not otherwise specified,Dermis,Endothelial cells not otherwise specified,Epidermis,Epithelial cells not otherwise specified,Fibroblasts,Granulocytes not otherwise specified,Granulosa cells,Heart,Hematopoietic progenitor…
hsa-miR-1178	miR-1178-3p (miRNAs w/seed UGCUCAC)	TargetScan Human	High (predicted)	PATJ	PATJ crumbs cell polarity complex component	Cancer,Dermatological Diseases and Conditions,Endocrine System Disorders,Gastrointestinal Disease,Hematological Disease,Hepatic System Disease,Immunological Disease,Neurological Disease,Organismal Injury and Abnormalities,Reproductive System Disease,Respiratory Disease	Plasma Membrane	other	HIPPO signaling,Tight Junction Signaling	Human,Mouse,Rat	Adipocytes,Adipose,Amygdala,B lymphocytes not otherwise specified,BDCA-3+ dendritic cells,Bladder,Brain,Brainstem,Central memory cytotoxic T cells,Central memory helper T cells,Cerebellum,Cerebral Cortex,Cytotoxic T cells,Dendritic cells not otherwise specified,Dorsal Root Ganglion,Effector memory cytotoxic T cells,Effector memory helper T cells,Effector memory RA+ cytotoxic T cells,Effector T ce…
hsa-miR-1178	miR-1178-3p (miRNAs w/seed UGCUCAC)	TargetScan Human	High (predicted)	PCDHB10	protocadherin beta 10	Cancer,Dermatological Diseases and Conditions,Developmental Disorder,Endocrine System Disorders,Gastrointestinal Disease,Hematological Disease,Hepatic System Disease,Hereditary Disorder,Immunological Disease,Neurological Disease,Organismal Injury and Abnormalities,Reproductive System Disease	Other	other		Human	Adipocytes,Adipose,Cardiomyocytes,Dermis,Endothelial cells not otherwise specified,Epidermis,Fibroblasts,Granulocytes not otherwise specified,Granulosa cells,Heart,Keratinocytes,Kidney,Langerhans cells,Lung,Mammary Gland,Other Cells,Other Epithelial cells,Other Nervous System,Other Neurons,Other Organ Systems,Ovary,Pancreas,Placenta,Prostate Gland,Retina,Skeletal Muscle,Skin,Smooth Muscle,Smooth …
hsa-miR-1178	miR-1178-3p (miRNAs w/seed UGCUCAC)	TargetScan Human	High (predicted)	PET100	PET100 cytochrome c oxidase chaperone	Cancer,Developmental Disorder,Endocrine System Disorders,Gastrointestinal Disease,Hepatic System Disease,Hereditary Disorder,Metabolic Disease,Neurological Disease,Organismal Injury and Abnormalities,Reproductive System Disease,Skeletal and Muscular Disorders	Other	other		Human,Mouse,Rat	Adipocytes,Adipose,Astrocytes,B lymphocytes not otherwise specified,Cardiomyocytes,Crypt,Dendritic cells not otherwise specified,Dermis,Endothelial cells not otherwise specified,Epidermis,Fibroblasts,Granulocytes not otherwise specified,Granulosa cells,Heart,Hematopoietic progenitor cells,Hepatocytes,Keratinocytes,Kidney,Langerhans cells,Liver,Lung,Macrophages not otherwise specified,Mammary Glan…
hsa-miR-1178	miR-1178-3p (miRNAs w/seed UGCUCAC)	TargetScan Human	High (predicted)	PIDD1	p53-induced death domain protein 1	Cancer,Dermatological Diseases and Conditions,Developmental Disorder,Endocrine System Disorders,Gastrointestinal Disease,Hepatic System Disease,Neurological Disease,Organismal Injury and Abnormalities,Renal and Urological Disease,Reproductive System Disease	Cytoplasm	peptidase	p53 Signaling	Human,Mouse,Rat	Adipocytes,Adipose,Astrocytes,B lymphocytes not otherwise specified,Brain,Cardiomyocytes,Cerebellum,Crypt,Cytotoxic T cells,Dendritic cells not otherwise specified,Endothelial cells not otherwise specified,Epidermis,Fibroblasts,Granulocytes not otherwise specified,Granulosa cells,Heart,Hematopoietic progenitor cells,Hepatocytes,Hippocampus,Immune cells not otherwise specified,Kidney,Large Intesti…
hsa-miR-1178	miR-1178-3p (miRNAs w/seed UGCUCAC)	TargetScan Human	High (predicted)	PIWIL1	piwi like RNA-mediated gene silencing 1	Cancer,Dermatological Diseases and Conditions,Endocrine System Disorders,Gastrointestinal Disease,Hepatic System Disease,Metabolic Disease,Organismal Injury and Abnormalities,Renal and Urological Disease,Reproductive System Disease,Respiratory Disease	Cytoplasm	enzyme	CSDE1 Signaling Pathway,MicroRNA Biogenesis Signaling Pathway	Human,Mouse,Rat	Activated helper T cells,Adipocytes,Adipose,Astrocytes,B lymphocytes not otherwise specified,Brain,Cardiomyocytes,CD56bright NK cells,CD56dim NK cells,Central memory helper T cells,Crypt,Cytotoxic T cells,Dendritic cells not otherwise specified,Dermis,Endothelial cells not otherwise specified,Epidermis,Fibroblasts,Granulosa cells,Heart,Keratinocytes,Kidney,Langerhans cells,Liver,Macrophages not o…
hsa-miR-1178	miR-1178-3p (miRNAs w/seed UGCUCAC)	TargetScan Human	High (predicted)	POC1B	POC1 centriolar protein B	Cancer,Dermatological Diseases and Conditions,Developmental Disorder,Endocrine System Disorders,Gastrointestinal Disease,Hepatic System Disease,Hereditary Disorder,Neurological Disease,Ophthalmic Disease,Organismal Injury and Abnormalities,Psychological Disorders,Renal and Urological Disease,Reproductive System Disease	Cytoplasm	other		Human,Mouse,Rat	Activated helper T cells,Adipocytes,Adipose,Astrocytes,B lymphocytes not otherwise specified,BDCA-1+ dendritic cells,BDCA-3+ dendritic cells,Cardiomyocytes,Central memory cytotoxic T cells,Crypt,Dendritic cells not otherwise specified,Dermis,Effector memory cytotoxic T cells,Effector memory RA+ cytotoxic T cells,Endothelial cells not otherwise specified,Epidermis,Fibroblasts,Granulocytes not othe…
hsa-miR-1178	miR-1178-3p (miRNAs w/seed UGCUCAC)	TargetScan Human	High (predicted)	PPIL1	peptidylprolyl isomerase like 1	Cancer,Dermatological Diseases and Conditions,Developmental Disorder,Gastrointestinal Disease,Hepatic System Disease,Neurological Disease,Organismal Injury and Abnormalities	Plasma Membrane	enzyme		Human,Mouse,Rat	Activated helper T cells,Adipocytes,Adipose,Astrocytes,B lymphocytes not otherwise specified,BDCA-1+ dendritic cells,BDCA-3+ dendritic cells,Cardiomyocytes,Crypt,Cytotoxic T cells,Dendritic cells not otherwise specified,Dermis,Dorsal Root Ganglion,Effector memory RA+ cytotoxic T cells,Effector T cells,Endothelial cells not otherwise specified,Epidermis,Fibroblasts,Granulocytes not otherwise speci…
hsa-miR-1178	miR-1178-3p (miRNAs w/seed UGCUCAC)	TargetScan Human	High (predicted)	PPP3CB	protein phosphatase 3 catalytic subunit beta	Cancer,Cardiovascular Disease,Connective Tissue Disorders,Dermatological Diseases and Conditions,Developmental Disorder,Endocrine System Disorders,Gastrointestinal Disease,Hematological Disease,Hepatic System Disease,Hereditary Disorder,Immunological Disease,Infectious Disease,Inflammatory Disease,Inflammatory Response,Metabolic Disease,Neurological Disease,Nutritional Disease,Ophthalmic Disease,…	Plasma Membrane	phosphatase	3-phosphoinositide Biosynthesis,3-phosphoinositide Degradation,ABRA Signaling Pathway,Autophagy,Axonal Guidance Signaling,B Cell Receptor Signaling,Calcium Signaling,Calcium-induced T Lymphocyte Apoptosis,cAMP-mediated signaling,Cardiac Hypertrophy Signaling,Cardiac Hypertrophy Signaling (Enhanced),CD28 Signaling in T Helper Cells,Chaperone Mediated Autophagy Signaling Pathway,Chronic Myeloid Leu…	Human,Mouse,Rat	Activated CD56bright NK cells,Activated CD56dim NK cells,Activated helper T cells,Activated Vd1 Gamma-delta T cells,Activated Vd2 Gamma-delta T cells,Adipocytes,Adipose,Amygdala,Astrocytes,B lymphocytes not otherwise specified,BDCA-1+ dendritic cells,BDCA-3+ dendritic cells,Bladder,Bone marrow cells not otherwise specified,Cardiomyocytes,Central memory cytotoxic T cells,Central memory helper T ce…
hsa-miR-1178	miR-1178-3p (miRNAs w/seed UGCUCAC)	TargetScan Human	High (predicted)	PPP3R2	protein phosphatase 3 regulatory subunit B, beta	Cancer,Cardiovascular Disease,Connective Tissue Disorders,Dermatological Diseases and Conditions,Endocrine System Disorders,Gastrointestinal Disease,Hematological Disease,Hepatic System Disease,Hereditary Disorder,Immunological Disease,Infectious Disease,Inflammatory Disease,Inflammatory Response,Metabolic Disease,Neurological Disease,Ophthalmic Disease,Organismal Injury and Abnormalities,Renal a…	Cytoplasm	other	3-phosphoinositide Biosynthesis,3-phosphoinositide Degradation,ABRA Signaling Pathway,Autophagy,Axonal Guidance Signaling,B Cell Receptor Signaling,Calcium Signaling,Calcium-induced T Lymphocyte Apoptosis,cAMP-mediated signaling,Cardiac Hypertrophy Signaling,Cardiac Hypertrophy Signaling (Enhanced),CD28 Signaling in T Helper Cells,Chaperone Mediated Autophagy Signaling Pathway,Chronic Myeloid Leu…	Human,Mouse,Rat	Bone marrow cells not otherwise specified,Cardiomyocytes,Effector memory RA+ cytotoxic T cells,Endothelial cells not otherwise specified,Heart,Macrophages not otherwise specified,Mammary Gland,Osteoblasts,Other Tissues and Primary Cells,Pancreas,Sertoli cells,Skeletal Muscle,Smooth Muscle,Smooth muscle cells not otherwise specified,Testis,A498,ACHN,EKVX,HOP-62,LOX IMVI,MDA-MB-231,Other Fibroblast…
hsa-miR-1178	miR-1178-3p (miRNAs w/seed UGCUCAC)	TargetScan Human	High (predicted)	PSMB7	proteasome 20S subunit beta 7	Cancer,Dermatological Diseases and Conditions,Endocrine System Disorders,Gastrointestinal Disease,Metabolic Disease,Neurological Disease,Organismal Injury and Abnormalities	Cytoplasm	peptidase	BAG2 Signaling Pathway,Chaperone Mediated Autophagy Signaling Pathway,FAT10 Signaling Pathway,Huntington's Disease Signaling,Inhibition of ARE-Mediated mRNA Degradation Pathway,Protein Ubiquitination Pathway	Human,Mouse,Rat	Activated CD56bright NK cells,Activated CD56dim NK cells,Activated helper T cells,Activated Vd1 Gamma-delta T cells,Activated Vd2 Gamma-delta T cells,Adipocytes,Adipose,Amygdala,Astrocytes,B lymphocytes not otherwise specified,BDCA-1+ dendritic cells,BDCA-3+ dendritic cells,Bladder,Cardiomyocytes,CD56bright NK cells,CD56dim NK cells,Central memory cytotoxic T cells,Central memory helper T cells,C…
hsa-miR-1178	miR-1178-3p (miRNAs w/seed UGCUCAC)	TargetScan Human	High (predicted)	PYCR2	pyrroline-5-carboxylate reductase 2	Cancer,Connective Tissue Disorders,Developmental Disorder,Endocrine System Disorders,Gastrointestinal Disease,Hepatic System Disease,Hereditary Disorder,Neurological Disease,Nutritional Disease,Organismal Injury and Abnormalities,Psychological Disorders,Reproductive System Disease,Skeletal and Muscular Disorders	Cytoplasm	enzyme	Arginine Degradation VI (Arginase 2 Pathway),Proline Biosynthesis I,Proline Biosynthesis II (from Arginine)	Human,Mouse,Rat	Activated helper T cells,Adipocytes,Adipose,Astrocytes,B lymphocytes not otherwise specified,BDCA-1+ dendritic cells,BDCA-3+ dendritic cells,Cardiomyocytes,Crypt,Cytotoxic T cells,Dendritic cells not otherwise specified,Dermis,Effector T cells,Endothelial cells not otherwise specified,Epidermis,Fibroblasts,Granulocytes not otherwise specified,Granulosa cells,Heart,Hematopoietic progenitor cells,H…
hsa-miR-1178	miR-1178-3p (miRNAs w/seed UGCUCAC)	TargetScan Human	High (predicted)	RAB15	RAB15, member RAS oncogene family	Cancer,Gastrointestinal Disease,Hepatic System Disease,Organismal Injury and Abnormalities,Reproductive System Disease	Cytoplasm	other		Human	Activated Vd1 Gamma-delta T cells,Activated Vd2 Gamma-delta T cells,Adipocytes,Adipose,Astrocytes,B lymphocytes not otherwise specified,BDCA-3+ dendritic cells,Brain,Cardiomyocytes,Crypt,Dendritic cells not otherwise specified,Dermis,Endothelial cells not otherwise specified,Epidermis,Fibroblasts,Granulocytes not otherwise specified,Granulosa cells,Heart,Hepatocytes,Immature monocyte-derived dend…
hsa-miR-1178	miR-1178-3p (miRNAs w/seed UGCUCAC)	TargetScan Human	High (predicted)	RABL3	RAB, member of RAS oncogene family like 3	Cancer,Dermatological Diseases and Conditions,Endocrine System Disorders,Gastrointestinal Disease,Hereditary Disorder,Organismal Injury and Abnormalities	Other	enzyme		Human,Mouse,Rat	Activated helper T cells,Activated Vd1 Gamma-delta T cells,Adipocytes,Adipose,Amygdala,Astrocytes,B lymphocytes not otherwise specified,BDCA-1+ dendritic cells,BDCA-3+ dendritic cells,Bladder,Cardiomyocytes,Central memory cytotoxic T cells,Central memory helper T cells,Cerebellum,Cerebral Cortex,Crypt,Cytotoxic T cells,Dendritic cells not otherwise specified,Dermis,Dorsal Root Ganglion,Effector m…
hsa-miR-1178	miR-1178-3p (miRNAs w/seed UGCUCAC)	TargetScan Human	High (predicted)	RP11_514O124			Other	other		Human
hsa-miR-1178	miR-1178-3p (miRNAs w/seed UGCUCAC)	TargetScan Human	High (predicted)	RP11_629B115			Other	other		Human
hsa-miR-1178	miR-1178-3p (miRNAs w/seed UGCUCAC)	TargetScan Human	High (predicted)	RP5_1052I52			Other	other		Human
hsa-miR-1178	miR-1178-3p (miRNAs w/seed UGCUCAC)	TargetScan Human	High (predicted)	RSAD2	radical S-adenosyl methionine domain containing 2	Antimicrobial Response,Cancer,Cardiovascular Disease,Connective Tissue Disorders,Dermatological Diseases and Conditions,Endocrine System Disorders,Gastrointestinal Disease,Hematological Disease,Hereditary Disorder,Immunological Disease,Infectious Disease,Inflammatory Disease,Inflammatory Response,Metabolic Disease,Neurological Disease,Organismal Injury and Abnormalities,Reproductive System Diseas…	Cytoplasm	enzyme	Role of Hypercytokinemia/hyperchemokinemia in the Pathogenesis of Influenza,Role of Lipids/Lipid Rafts in the Pathogenesis of Influenza	Human,Mouse,Rat	Activated CD56bright NK cells,Adipocytes,Adipose,Amygdala,Astrocytes,B lymphocytes not otherwise specified,BDCA-1+ dendritic cells,BDCA-3+ dendritic cells,Bladder,Cardiomyocytes,Central memory cytotoxic T cells,Cerebellum,Cerebral Cortex,Crypt,Cytotoxic T cells,Dendritic cells not otherwise specified,Dermis,Dorsal Root Ganglion,Effector memory cytotoxic T cells,Effector memory RA+ cytotoxic T cel…
hsa-miR-1178	miR-1178-3p (miRNAs w/seed UGCUCAC)	TargetScan Human	High (predicted)	SCRG1	stimulator of chondrogenesis 1	Cancer,Cardiovascular Disease,Gastrointestinal Disease,Neurological Disease,Organismal Injury and Abnormalities,Reproductive System Disease,Respiratory Disease	Extracellular Space	other		Human,Mouse,Rat	Activated CD56dim NK cells,Activated helper T cells,Activated Vd1 Gamma-delta T cells,Activated Vd2 Gamma-delta T cells,Adipocytes,Adipose,Amygdala,Astrocytes,B lymphocytes not otherwise specified,Brain,Brainstem,Cardiomyocytes,Caudate Nucleus,Central memory cytotoxic T cells,Cerebellum,Cerebral Cortex,Crypt,Cytotoxic T cells,Dendritic cells not otherwise specified,Dermis,Endothelial cells not ot…
hsa-miR-1178	miR-1178-3p (miRNAs w/seed UGCUCAC)	TargetScan Human	High (predicted)	SLC25A45	solute carrier family 25 member 45	Cancer,Dermatological Diseases and Conditions,Gastrointestinal Disease,Organismal Injury and Abnormalities	Cytoplasm	transporter		Human,Mouse,Rat	Adipocytes,Adipose,Astrocytes,B lymphocytes not otherwise specified,BDCA-1+ dendritic cells,BDCA-3+ dendritic cells,Cardiomyocytes,Crypt,Dendritic cells not otherwise specified,Dermis,Endothelial cells not otherwise specified,Epidermis,Fibroblasts,Granulocytes not otherwise specified,Granulosa cells,Heart,Hematopoietic progenitor cells,Hepatocytes,Immature monocyte-derived dendritic cells,Keratin…
hsa-miR-1178	miR-1178-3p (miRNAs w/seed UGCUCAC)	TargetScan Human	High (predicted)	SLC38A6	solute carrier family 38 member 6	Cancer,Dermatological Diseases and Conditions,Endocrine System Disorders,Gastrointestinal Disease,Infectious Disease,Organismal Injury and Abnormalities,Reproductive System Disease,Respiratory Disease	Plasma Membrane	transporter		Human,Mouse,Rat	Activated Vd1 Gamma-delta T cells,Activated Vd2 Gamma-delta T cells,Adipocytes,Adipose,Astrocytes,B lymphocytes not otherwise specified,BDCA-1+ dendritic cells,BDCA-3+ dendritic cells,Cardiomyocytes,Central memory helper T cells,Crypt,Dendritic cells not otherwise specified,Dermis,Effector memory helper T cells,Effector memory RA+ cytotoxic T cells,Endothelial cells not otherwise specified,Epider…
hsa-miR-1178	miR-1178-3p (miRNAs w/seed UGCUCAC)	TargetScan Human	High (predicted)	SLC39A6	solute carrier family 39 member 6	Cancer,Dermatological Diseases and Conditions,Gastrointestinal Disease,Hepatic System Disease,Neurological Disease,Organismal Injury and Abnormalities,Reproductive System Disease	Plasma Membrane	transporter		Human,Mouse,Rat	Activated CD56bright NK cells,Activated CD56dim NK cells,Activated helper T cells,Activated Vd1 Gamma-delta T cells,Activated Vd2 Gamma-delta T cells,Adipocytes,Adipose,Amygdala,Astrocytes,B lymphocytes not otherwise specified,BDCA-1+ dendritic cells,BDCA-3+ dendritic cells,Bladder,Bone marrow-derived dendritic cells,Cardiomyocytes,CD56bright NK cells,CD56dim NK cells,Central memory cytotoxic T c…
hsa-miR-1178	miR-1178-3p (miRNAs w/seed UGCUCAC)	TargetScan Human	High (predicted)	SPTLC1	serine palmitoyltransferase long chain base subunit 1	Cancer,Connective Tissue Disorders,Developmental Disorder,Gastrointestinal Disease,Hereditary Disorder,Inflammatory Response,Metabolic Disease,Neurological Disease,Nutritional Disease,Organismal Injury and Abnormalities,Psychological Disorders,Respiratory Disease,Skeletal and Muscular Disorders	Cytoplasm	enzyme	Ceramide Biosynthesis,Endocannabinoid Cancer Inhibition Pathway	Human,Mouse,Rat	Activated CD56bright NK cells,Activated CD56dim NK cells,Activated helper T cells,Activated Vd1 Gamma-delta T cells,Activated Vd2 Gamma-delta T cells,Adipocytes,Adipose,Amygdala,Astrocytes,B lymphocytes not otherwise specified,BDCA-1+ dendritic cells,BDCA-3+ dendritic cells,Bladder,Brain,Cardiomyocytes,CD56bright NK cells,CD56dim NK cells,Central memory cytotoxic T cells,Central memory helper T c…
hsa-miR-1178	miR-1178-3p (miRNAs w/seed UGCUCAC)	TargetScan Human	High (predicted)	SRPRA	SRP receptor subunit alpha	Cancer,Dermatological Diseases and Conditions,Endocrine System Disorders,Gastrointestinal Disease,Hepatic System Disease,Organismal Injury and Abnormalities,Reproductive System Disease,Respiratory Disease	Cytoplasm	other		Human,Mouse,Rat	Adipocytes,Adipose,B lymphocytes not otherwise specified,Crypt,Dendritic cells not otherwise specified,Dorsal Root Ganglion,Endothelial cells not otherwise specified,Fibroblasts,Granulocytes not otherwise specified,Granulosa cells,Hematopoietic progenitor cells,Hepatocytes,Kidney,Large Intestine,Liver,Lung,Macrophages not otherwise specified,Mammary Gland,Memory B cells,Monocytes not otherwise sp…
hsa-miR-1178	miR-1178-3p (miRNAs w/seed UGCUCAC)	TargetScan Human	High (predicted)	SSR3	signal sequence receptor subunit 3	Cancer,Developmental Disorder,Hereditary Disorder,Infectious Disease,Metabolic Disease,Neurological Disease,Organismal Injury and Abnormalities,Psychological Disorders,Respiratory Disease,Skeletal and Muscular Disorders	Cytoplasm	other	Insulin Secretion Signaling Pathway	Human,Mouse,Rat	Adipocytes,Adipose,Amygdala,Astrocytes,B lymphocytes not otherwise specified,BDCA-1+ dendritic cells,BDCA-3+ dendritic cells,Bladder,Cardiomyocytes,Central memory cytotoxic T cells,Cerebellum,Cerebral Cortex,Crypt,Cytotoxic T cells,Dendritic cells not otherwise specified,Dermis,Dorsal Root Ganglion,Effector memory cytotoxic T cells,Effector memory RA+ cytotoxic T cells,Effector T cells,Endothelia…
hsa-miR-1178	miR-1178-3p (miRNAs w/seed UGCUCAC)	TargetScan Human	High (predicted)	ST8SIA4	ST8 alpha-N-acetyl-neuraminide alpha-2,8-sialyltransferase 4	Cancer,Cardiovascular Disease,Dermatological Diseases and Conditions,Developmental Disorder,Endocrine System Disorders,Gastrointestinal Disease,Neurological Disease,Organismal Injury and Abnormalities,Psychological Disorders,Reproductive System Disease,Skeletal and Muscular Disorders,Tumor Morphology	Cytoplasm	enzyme		Human,Mouse,Rat	Activated CD56bright NK cells,Activated helper T cells,Activated Vd1 Gamma-delta T cells,Activated Vd2 Gamma-delta T cells,Adipocytes,Adipose,Amygdala,Astrocytes,B lymphocytes not otherwise specified,BDCA-1+ dendritic cells,BDCA-3+ dendritic cells,Bladder,Brain,Brainstem,Cardiomyocytes,Caudate Nucleus,Central memory cytotoxic T cells,Cerebellum,Cerebral Cortex,Corpus Callosum,Cytotoxic T cells,De…
hsa-miR-1178	miR-1178-3p (miRNAs w/seed UGCUCAC)	TargetScan Human	High (predicted)	TEX44	testis expressed 44	Cancer,Dermatological Diseases and Conditions,Endocrine System Disorders,Gastrointestinal Disease,Organismal Injury and Abnormalities,Reproductive System Disease,Respiratory Disease	Cytoplasm	other		Human,Mouse,Rat	Spleen,Testis,OVCAR-4
hsa-miR-1178	miR-1178-3p (miRNAs w/seed UGCUCAC)	TargetScan Human	High (predicted)	TFRC	transferrin receptor	Cancer,Cardiovascular Disease,Connective Tissue Disorders,Dermatological Diseases and Conditions,Developmental Disorder,Endocrine System Disorders,Gastrointestinal Disease,Hematological Disease,Hepatic System Disease,Hereditary Disorder,Immunological Disease,Infectious Disease,Inflammatory Disease,Inflammatory Response,Metabolic Disease,Neurological Disease,Nutritional Disease,Organismal Injury a…	Plasma Membrane	transporter	Clathrin-mediated Endocytosis Signaling,Ferroptosis Signaling Pathway,Hepatic Fibrosis Signaling Pathway,Iron homeostasis signaling pathway,Virus Entry via Endocytic Pathways	Human,Mouse,Rat	Activated CD56bright NK cells,Activated CD56dim NK cells,Activated helper T cells,Activated Vd1 Gamma-delta T cells,Activated Vd2 Gamma-delta T cells,Adipocytes,Adipose,Adrenal Gland,Amygdala,Astrocytes,B lymphocytes not otherwise specified,BDCA-1+ dendritic cells,BDCA-3+ dendritic cells,Bladder,Brain,Cardiomyocytes,CD4+ T-lymphocytes,CD56bright NK cells,CD56dim NK cells,Central memory cytotoxic …
hsa-miR-1178	miR-1178-3p (miRNAs w/seed UGCUCAC)	TargetScan Human	High (predicted)	TGFA	transforming growth factor alpha	Cancer,Cardiovascular Disease,Connective Tissue Disorders,Dermatological Diseases and Conditions,Developmental Disorder,Endocrine System Disorders,Gastrointestinal Disease,Hepatic System Disease,Hereditary Disorder,Immunological Disease,Inflammatory Disease,Inflammatory Response,Neurological Disease,Nutritional Disease,Ophthalmic Disease,Organismal Injury and Abnormalities,Renal and Urological Di…	Extracellular Space	growth factor	Autophagy,Breast Cancer Regulation by Stathmin1,CLEAR Signaling Pathway,CREB Signaling in Neurons,ERBB Signaling,Glioma Signaling,Hepatic Fibrosis / Hepatic Stellate Cell Activation,HER-2 Signaling in Breast Cancer,HIF1α Signaling,MicroRNA Biogenesis Signaling Pathway,NAD Signaling Pathway,Neuregulin Signaling,NF-κB Signaling,Non-Small Cell Lung Cancer Signaling,Pancreatic Adenocarcinoma Signalin…	Human,Mouse,Rat	Activated helper T cells,Adipocytes,Adipose,Amygdala,Astrocytes,B lymphocytes not otherwise specified,BDCA-1+ dendritic cells,BDCA-3+ dendritic cells,Bladder,Brain,Cardiomyocytes,Caudate Nucleus,CD56bright NK cells,CD56dim NK cells,Central memory cytotoxic T cells,Central memory helper T cells,Cerebellum,Cerebral Cortex,Crypt,Cytotoxic T cells,Dendritic cells not otherwise specified,Dermis,Dorsal…
hsa-miR-1178	miR-1178-3p (miRNAs w/seed UGCUCAC)	TargetScan Human	High (predicted)	THAP10	THAP domain containing 10	Cancer,Dermatological Diseases and Conditions,Gastrointestinal Disease,Hematological Disease,Immunological Disease,Neurological Disease,Organismal Injury and Abnormalities	Other	other		Human	Adipocytes,Adipose,B lymphocytes not otherwise specified,Cardiomyocytes,CD56bright NK cells,Crypt,Dermis,Endothelial cells not otherwise specified,Epidermis,Fibroblasts,Granulosa cells,Heart,Hematopoietic progenitor cells,Hepatocytes,Keratinocytes,Kidney,Langerhans cells,Liver,Lung,Macrophages not otherwise specified,Mammary Gland,Monocyte-derived macrophage,Monocytes not otherwise specified,Othe…
hsa-miR-1178	miR-1178-3p (miRNAs w/seed UGCUCAC)	TargetScan Human	High (predicted)	TMEM184B	transmembrane protein 184B	Cancer,Endocrine System Disorders,Gastrointestinal Disease,Hepatic System Disease,Neurological Disease,Organismal Injury and Abnormalities,Skeletal and Muscular Disorders	Other	other		Human,Mouse,Rat	Activated CD56bright NK cells,Activated CD56dim NK cells,Activated Vd1 Gamma-delta T cells,Activated Vd2 Gamma-delta T cells,Adipocytes,Adipose,Amygdala,Astrocytes,B lymphocytes not otherwise specified,BDCA-1+ dendritic cells,BDCA-3+ dendritic cells,Bladder,Brain,Cardiomyocytes,CD56bright NK cells,CD56dim NK cells,Central memory helper T cells,Cerebellum,Cerebral Cortex,Crypt,Cytotoxic T cells,De…
hsa-miR-1178	miR-1178-3p (miRNAs w/seed UGCUCAC)	TargetScan Human	High (predicted)	TMEM235	transmembrane protein 235	Cancer,Endocrine System Disorders,Gastrointestinal Disease,Hepatic System Disease,Neurological Disease,Organismal Injury and Abnormalities,Renal and Urological Disease,Reproductive System Disease	Other	other		Human,Mouse,Rat	Astrocytes,Cardiomyocytes,Heart,Other Cells,Other Nervous System,Other Neurons
hsa-miR-1178	miR-1178-3p (miRNAs w/seed UGCUCAC)	TargetScan Human	High (predicted)	TMEM273	transmembrane protein 273	Cancer,Dermatological Diseases and Conditions,Gastrointestinal Disease,Organismal Injury and Abnormalities,Reproductive System Disease	Other	other		Human,Mouse,Rat	Adipocytes,Adipose,Amygdala,B lymphocytes not otherwise specified,BDCA-1+ dendritic cells,BDCA-3+ dendritic cells,Bladder,Cerebellum,Cerebral Cortex,Cytotoxic T cells,Dendritic cells not otherwise specified,Dorsal Root Ganglion,Effector memory RA+ cytotoxic T cells,Effector T cells,Endothelial cells not otherwise specified,Epidermis,Fibroblasts,Heart,Hippocampus,Hypothalamus,Immature monocyte-der…
hsa-miR-1178	miR-1178-3p (miRNAs w/seed UGCUCAC)	TargetScan Human	High (predicted)	TMPRSS11E	transmembrane serine protease 11E	Cancer,Dermatological Diseases and Conditions,Endocrine System Disorders,Gastrointestinal Disease,Infectious Disease,Neurological Disease,Organismal Injury and Abnormalities,Respiratory Disease	Extracellular Space	peptidase	Neuroprotective Role of THOP1 in Alzheimer's Disease	Human,Mouse,Rat	B lymphocytes not otherwise specified,Cardiomyocytes,Dendritic cells not otherwise specified,Dermis,Endothelial cells not otherwise specified,Epidermis,Fibroblasts,Heart,Keratinocytes,Kidney,Langerhans cells,Lung,Macrophages not otherwise specified,Mammary Gland,Monocytes not otherwise specified,Other Cells,Other Epithelial cells,Other Nervous System,Other Neurons,Other Organ Systems,Pancreas,Pla…
hsa-miR-1178	miR-1178-3p (miRNAs w/seed UGCUCAC)	TargetScan Human	High (predicted)	UCMA	upper zone of growth plate and cartilage matrix associated	Cancer,Dermatological Diseases and Conditions,Developmental Disorder,Gastrointestinal Disease,Neurological Disease,Organismal Injury and Abnormalities,Psychological Disorders,Reproductive System Disease	Extracellular Space	other		Human,Mouse,Rat	Dendritic cells not otherwise specified,Fibroblasts,Mammary Gland,Other Cells,Other Nervous System,Ovary,Placenta,Skin,Stromal cells,Uterus
hsa-miR-1178	miR-1178-3p (miRNAs w/seed UGCUCAC)	TargetScan Human	High (predicted)	VKORC1L1	vitamin K epoxide reductase complex subunit 1 like 1	Cancer,Gastrointestinal Disease,Hematological Disease,Immunological Disease,Organismal Injury and Abnormalities,Reproductive System Disease,Respiratory Disease	Cytoplasm	enzyme		Human,Mouse,Rat	Activated helper T cells,Adipocytes,Adipose,Amygdala,Astrocytes,B lymphocytes not otherwise specified,BDCA-1+ dendritic cells,BDCA-3+ dendritic cells,Bladder,Cardiomyocytes,Cerebellum,Cerebral Cortex,Crypt,Cytotoxic T cells,Dendritic cells not otherwise specified,Dermis,Dorsal Root Ganglion,Effector T cells,Endothelial cells not otherwise specified,Epidermis,Fibroblasts,Granulocytes not otherwise…
hsa-miR-1178	miR-1178-3p (miRNAs w/seed UGCUCAC)	TargetScan Human	High (predicted)	VTCN1	V-set domain containing T cell activation inhibitor 1	Cancer,Connective Tissue Disorders,Dermatological Diseases and Conditions,Developmental Disorder,Endocrine System Disorders,Gastrointestinal Disease,Hematological Disease,Hepatic System Disease,Immunological Disease,Infectious Disease,Inflammatory Disease,Inflammatory Response,Metabolic Disease,Neurological Disease,Organismal Injury and Abnormalities,Renal and Urological Disease,Reproductive Syst…	Plasma Membrane	other		Human,Mouse,Rat	Adipocytes,Adipose,Amygdala,B lymphocytes not otherwise specified,Bladder,Brain,Cardiomyocytes,Cerebellum,Cytotoxic T cells,Dendritic cells not otherwise specified,Dorsal Root Ganglion,Effector T cells,Endothelial cells not otherwise specified,Epidermis,Fibroblasts,Heart,Hippocampus,Immune cells not otherwise specified,Kidney,Large Intestine,Liver,Lung,Macrophages not otherwise specified,Mammary …
hsa-miR-1178	miR-1178-3p (miRNAs w/seed UGCUCAC)	TargetScan Human	High (predicted)	XK	X-linked Kx blood group antigen, Kell and VPS13A binding protein	Cancer,Cardiovascular Disease,Connective Tissue Disorders,Developmental Disorder,Endocrine System Disorders,Gastrointestinal Disease,Hematological Disease,Hepatic System Disease,Hereditary Disorder,Immunological Disease,Infectious Disease,Inflammatory Disease,Neurological Disease,Organismal Injury and Abnormalities,Psychological Disorders,Renal and Urological Disease,Reproductive System Disease,R…	Plasma Membrane	other		Human,Mouse,Rat	Astrocytes,B lymphocytes not otherwise specified,Cardiomyocytes,Crypt,Dendritic cells not otherwise specified,Dermis,Endothelial cells not otherwise specified,Epidermis,Fibroblasts,Granulosa cells,Heart,Hematopoietic progenitor cells,Hepatocytes,Keratinocytes,Kidney,Liver,Lung,Macrophages not otherwise specified,Mammary Gland,Melanocytes,Microglia,Other Cells,Other Epithelial cells,Other Nervous …
hsa-miR-1178	miR-1178-3p (miRNAs w/seed UGCUCAC)	TargetScan Human	High (predicted)	ZMAT4	zinc finger matrin-type 4	Cancer,Dermatological Diseases and Conditions,Endocrine System Disorders,Gastrointestinal Disease,Hepatic System Disease,Metabolic Disease,Organismal Injury and Abnormalities,Reproductive System Disease,Respiratory Disease	Nucleus	other		Human,Mouse,Rat	Adipose,Amygdala,Astrocytes,B lymphocytes not otherwise specified,Bladder,Cardiomyocytes,Cerebellum,Cerebral Cortex,Cytotoxic T cells,Dendritic cells not otherwise specified,Dorsal Root Ganglion,Effector T cells,Epidermis,Fibroblasts,Granulosa cells,Heart,Hippocampus,Hypothalamus,Kidney,Large Intestine,Liver,Lung,Mammary Gland,Microglia,NK cells not otherwise specified,Olfactory Bulb,Other Cells,…
hsa-miR-1178	miR-1178-3p (miRNAs w/seed UGCUCAC)	TargetScan Human	High (predicted)	ZNF488	zinc finger protein 488		Nucleus	transcription regulator		Human,Mouse,Rat	Adipocytes,Adipose,Astrocytes,Cardiomyocytes,Dermis,Endothelial cells not otherwise specified,Epidermis,Fibroblasts,Granulosa cells,Heart,Keratinocytes,Kidney,Mammary Gland,Microglia,Other Cells,Other Epithelial cells,Other Nervous System,Other Neurons,Other Organ Systems,Ovary,Pancreas,Placenta,Prostate Gland,Retina,Skeletal Muscle,Skin,Smooth Muscle,Smooth muscle cells not otherwise specified,T…
hsa-miR-1178	miR-1178-3p (miRNAs w/seed UGCUCAC)	TargetScan Human	High (predicted)	ZSCAN18	zinc finger and SCAN domain containing 18	Cancer,Dermatological Diseases and Conditions,Endocrine System Disorders,Gastrointestinal Disease,Hepatic System Disease,Neurological Disease,Organismal Injury and Abnormalities,Renal and Urological Disease,Reproductive System Disease,Respiratory Disease	Other	other		Human,Mouse,Rat	Activated Vd1 Gamma-delta T cells,Adipocytes,Adipose,Astrocytes,B lymphocytes not otherwise specified,BDCA-1+ dendritic cells,Cardiomyocytes,Central memory cytotoxic T cells,Crypt,Cytotoxic T cells,Dendritic cells not otherwise specified,Dermis,Effector memory cytotoxic T cells,Endothelial cells not otherwise specified,Epidermis,Fibroblasts,Granulocytes not otherwise specified,Granulosa cells,Hea…
hsa-miR-1183	miR-1183 (miRNAs w/seed ACUGUAG)	TargetScan Human	High (predicted)	ACTR6	actin related protein 6	Cancer,Cardiovascular Disease,Dermatological Diseases and Conditions,Endocrine System Disorders,Gastrointestinal Disease,Neurological Disease,Organismal Injury and Abnormalities,Reproductive System Disease	Nucleus	transporter		Human,Mouse,Rat	Activated CD56bright NK cells,Activated CD56dim NK cells,Activated helper T cells,Activated Vd1 Gamma-delta T cells,Activated Vd2 Gamma-delta T cells,Adipocytes,Adipose,Amygdala,Astrocytes,B lymphocytes not otherwise specified,BDCA-1+ dendritic cells,BDCA-3+ dendritic cells,Bladder,Cardiomyocytes,Central memory cytotoxic T cells,Central memory helper T cells,Cerebellum,Cerebral Cortex,Crypt,Cytot…
hsa-miR-1183	miR-1183 (miRNAs w/seed ACUGUAG)	TargetScan Human	High (predicted)	ARG2	arginase 2	Cancer,Cardiovascular Disease,Dermatological Diseases and Conditions,Endocrine System Disorders,Gastrointestinal Disease,Inflammatory Disease,Inflammatory Response,Metabolic Disease,Neurological Disease,Organismal Injury and Abnormalities,Reproductive System Disease,Respiratory Disease	Cytoplasm	enzyme	Arginine Degradation I (Arginase Pathway),Arginine Degradation VI (Arginase 2 Pathway),Citrulline Biosynthesis,Estrogen Receptor Signaling,Glucocorticoid Receptor Signaling,IL-10 Signaling,LXR/RXR Activation,Mitochondrial Dysfunction,Neutrophil Extracellular Trap Signaling Pathway,Nitric Oxide Signaling in the Cardiovascular System,Production of Nitric Oxide and Reactive Oxygen Species in Macroph…	Human,Mouse,Rat	Activated CD56bright NK cells,Activated CD56dim NK cells,Activated helper T cells,Activated Vd1 Gamma-delta T cells,Activated Vd2 Gamma-delta T cells,Adipocytes,Adipose,Astrocytes,B lymphocytes not otherwise specified,Bladder,Bone marrow-derived macrophages,Cardiomyocytes,CD56dim NK cells,Central memory helper T cells,Crypt,Cytotoxic T cells,Dendritic cells not otherwise specified,Dermis,Effector…
hsa-miR-1183	miR-1183 (miRNAs w/seed ACUGUAG)	TargetScan Human	High (predicted)	C5orf24	chromosome 5 open reading frame 24	Cancer,Organismal Injury and Abnormalities,Reproductive System Disease	Other	other		Human,Mouse,Rat	Activated helper T cells,Adipocytes,Adipose,Amygdala,Astrocytes,B lymphocytes not otherwise specified,BDCA-1+ dendritic cells,BDCA-3+ dendritic cells,Bladder,Cardiomyocytes,Central memory cytotoxic T cells,Cerebellum,Cerebral Cortex,Crypt,Cytotoxic T cells,Dendritic cells not otherwise specified,Dermis,Dorsal Root Ganglion,Effector memory cytotoxic T cells,Effector memory RA+ cytotoxic T cells,Ef…
hsa-miR-1183	miR-1183 (miRNAs w/seed ACUGUAG)	TargetScan Human	High (predicted)	CAV2	caveolin 2	Cancer,Dermatological Diseases and Conditions,Developmental Disorder,Endocrine System Disorders,Hematological Disease,Hereditary Disorder,Immunological Disease,Infectious Disease,Inflammatory Disease,Inflammatory Response,Organismal Injury and Abnormalities,Renal and Urological Disease,Reproductive System Disease,Respiratory Disease,Skeletal and Muscular Disorders	Plasma Membrane	other	G Beta Gamma Signaling,Serotonin Receptor Signaling	Human,Mouse,Rat	Adipocytes,Adipose,Amygdala,Astrocytes,B lymphocytes not otherwise specified,Bladder,Brain,Cardiomyocytes,CD56dim NK cells,Central memory cytotoxic T cells,Central memory helper T cells,Cerebellum,Cerebral Cortex,Crypt,Cytotoxic T cells,Dendritic cells not otherwise specified,Dermis,Dorsal Root Ganglion,Effector memory cytotoxic T cells,Effector memory helper T cells,Endothelial cells not otherwi…
hsa-miR-1183	miR-1183 (miRNAs w/seed ACUGUAG)	TargetScan Human	High (predicted)	CD8A	CD8a molecule	Antimicrobial Response,Cancer,Connective Tissue Disorders,Dermatological Diseases and Conditions,Developmental Disorder,Endocrine System Disorders,Gastrointestinal Disease,Hematological Disease,Hereditary Disorder,Hypersensitivity Response,Immunological Disease,Infectious Disease,Inflammatory Disease,Inflammatory Response,Neurological Disease,Nutritional Disease,Organismal Injury and Abnormalitie…	Plasma Membrane	other	Communication between Innate and Adaptive Immune Cells,CTLA4 Signaling in Cytotoxic T Lymphocytes,Hematopoiesis from Pluripotent Stem Cells,Primary Immunodeficiency Signaling,T Cell Receptor Signaling,Th1 and Th2 Activation Pathway,Th1 Pathway	Human,Mouse,Rat	Activated CD56bright NK cells,Activated CD56dim NK cells,Activated Vd1 Gamma-delta T cells,Activated Vd2 Gamma-delta T cells,Adipocytes,Adipose,B lymphocytes not otherwise specified,Cardiomyocytes,CD4+ T-lymphocytes,CD56dim NK cells,Central memory cytotoxic T cells,Cytotoxic T cells,Dendritic cells not otherwise specified,Dermis,Effector memory cytotoxic T cells,Effector memory RA+ cytotoxic T ce…
hsa-miR-1183	miR-1183 (miRNAs w/seed ACUGUAG)	TargetScan Human	High (predicted)	CENPQ	centromere protein Q	Cancer,Endocrine System Disorders,Gastrointestinal Disease,Hematological Disease,Immunological Disease,Organismal Injury and Abnormalities	Nucleus	other	Kinetochore Metaphase Signaling Pathway	Human,Mouse,Rat	Activated CD56bright NK cells,Activated CD56dim NK cells,Activated helper T cells,Activated Vd1 Gamma-delta T cells,Activated Vd2 Gamma-delta T cells,Adipocytes,Adipose,Astrocytes,B lymphocytes not otherwise specified,Cardiomyocytes,Central memory cytotoxic T cells,Central memory helper T cells,Crypt,Cytotoxic T cells,Dendritic cells not otherwise specified,Dermis,Effector memory cytotoxic T cell…
hsa-miR-1183	miR-1183 (miRNAs w/seed ACUGUAG)	TargetScan Human	High (predicted)	CFAP53	cilia and flagella associated protein 53	Cancer,Cardiovascular Disease,Dermatological Diseases and Conditions,Developmental Disorder,Endocrine System Disorders,Gastrointestinal Disease,Hereditary Disorder,Neurological Disease,Organismal Injury and Abnormalities,Renal and Urological Disease	Cytoplasm	other		Human,Mouse,Rat	Adipocytes,Adipose,Astrocytes,B lymphocytes not otherwise specified,BDCA-3+ dendritic cells,Cardiomyocytes,Crypt,Dendritic cells not otherwise specified,Endothelial cells not otherwise specified,Fibroblasts,Granulocytes not otherwise specified,Granulosa cells,Heart,Hematopoietic progenitor cells,Hepatocytes,Kidney,Liver,Lung,Macrophages not otherwise specified,Mammary Gland,Microglia,Monocytes no…
hsa-miR-1183	miR-1183 (miRNAs w/seed ACUGUAG)	TargetScan Human	High (predicted)	CGA	glycoprotein hormones, alpha polypeptide	Cancer,Cardiovascular Disease,Dermatological Diseases and Conditions,Developmental Disorder,Endocrine System Disorders,Gastrointestinal Disease,Hereditary Disorder,Organismal Injury and Abnormalities,Renal and Urological Disease,Reproductive System Disease	Extracellular Space	other	Autoimmune Thyroid Disease Signaling,Ovarian Cancer Signaling,Role of JAK1, JAK2 and TYK2 in Interferon Signaling	Human,Mouse,Rat	Activated Vd1 Gamma-delta T cells,Adrenal Gland,Amygdala,B lymphocytes not otherwise specified,Bladder,Brain,Cardiomyocytes,Cerebellum,Dendritic cells not otherwise specified,Dorsal Root Ganglion,Effector T cells,Endothelial cells not otherwise specified,Epidermis,Fibroblasts,Heart,Hypothalamus,Kidney,Large Intestine,Mammary Gland,Other Cells,Other Epithelial cells,Other Nervous System,Other Neur…
hsa-miR-1183	miR-1183 (miRNAs w/seed ACUGUAG)	TargetScan Human	High (predicted)	CGRRF1	cell growth regulator with ring finger domain 1	Cancer,Gastrointestinal Disease,Hematological Disease,Hepatic System Disease,Immunological Disease,Organismal Injury and Abnormalities,Reproductive System Disease,Skeletal and Muscular Disorders	Nucleus	other		Human,Mouse,Rat	Activated CD56bright NK cells,Activated CD56dim NK cells,Activated helper T cells,Activated Vd1 Gamma-delta T cells,Activated Vd2 Gamma-delta T cells,Adipocytes,Adipose,Amygdala,Astrocytes,B lymphocytes not otherwise specified,BDCA-1+ dendritic cells,BDCA-3+ dendritic cells,Bladder,Cardiomyocytes,CD56bright NK cells,CD56dim NK cells,Central memory cytotoxic T cells,Central memory helper T cells,C…
hsa-miR-1183	miR-1183 (miRNAs w/seed ACUGUAG)	TargetScan Human	High (predicted)	CNIH2	cornichon family AMPA receptor auxiliary protein 2	Cancer,Gastrointestinal Disease,Organismal Injury and Abnormalities	Extracellular Space	other		Human,Mouse,Rat	Adipocytes,Adipose,Amygdala,Astrocytes,B lymphocytes not otherwise specified,Brain,Cardiomyocytes,Cerebellum,Cerebral Cortex,Crypt,Dendritic cells not otherwise specified,Dermis,Dorsal Root Ganglion,Endothelial cells not otherwise specified,Epidermis,Fibroblasts,Granulosa cells,Heart,Hepatocytes,Hippocampus,Hypothalamus,Keratinocytes,Kidney,Langerhans cells,Liver,Lung,Macrophages not otherwise sp…
hsa-miR-1183	miR-1183 (miRNAs w/seed ACUGUAG)	TargetScan Human	High (predicted)	CNN3	calponin 3	Cancer,Connective Tissue Disorders,Dermatological Diseases and Conditions,Developmental Disorder,Endocrine System Disorders,Hereditary Disorder,Immunological Disease,Inflammatory Disease,Inflammatory Response,Neurological Disease,Organismal Injury and Abnormalities,Respiratory Disease,Skeletal and Muscular Disorders	Cytoplasm	other		Human,Mouse,Rat	Adipocytes,Adipose,Amygdala,Astrocytes,B lymphocytes not otherwise specified,Bladder,Cardiomyocytes,Cerebellum,Cerebral Cortex,Crypt,Dendritic cells not otherwise specified,Dermis,Dorsal Root Ganglion,Endothelial cells not otherwise specified,Epidermis,Fibroblasts,Granulocytes not otherwise specified,Granulosa cells,Heart,Hematopoietic progenitor cells,Hepatocytes,Hippocampus,Hypothalamus,Keratin…
hsa-miR-1183	miR-1183 (miRNAs w/seed ACUGUAG)	TargetScan Human	High (predicted)	CRLF3	cytokine receptor like factor 3	Cancer,Endocrine System Disorders,Gastrointestinal Disease,Hepatic System Disease,Inflammatory Response,Organismal Injury and Abnormalities,Reproductive System Disease	Cytoplasm	transcription regulator		Human,Mouse,Rat	Activated CD56bright NK cells,Activated CD56dim NK cells,Activated helper T cells,Activated Vd1 Gamma-delta T cells,Activated Vd2 Gamma-delta T cells,Adipocytes,Adipose,Astrocytes,B lymphocytes not otherwise specified,BDCA-1+ dendritic cells,BDCA-3+ dendritic cells,Cardiomyocytes,CD56bright NK cells,CD56dim NK cells,Central memory cytotoxic T cells,Central memory helper T cells,Crypt,Cytotoxic T …
hsa-miR-1183	miR-1183 (miRNAs w/seed ACUGUAG)	TargetScan Human	High (predicted)	CSTF2T	cleavage stimulation factor subunit 2 tau variant	Cancer,Cardiovascular Disease,Dermatological Diseases and Conditions,Developmental Disorder,Endocrine System Disorders,Gastrointestinal Disease,Hereditary Disorder,Neurological Disease,Organismal Injury and Abnormalities,Reproductive System Disease	Nucleus	other		Human,Mouse,Rat	Activated CD56bright NK cells,Activated helper T cells,Activated Vd1 Gamma-delta T cells,Activated Vd2 Gamma-delta T cells,Adipocytes,Adipose,Amygdala,Astrocytes,B lymphocytes not otherwise specified,BDCA-1+ dendritic cells,BDCA-3+ dendritic cells,Bladder,Cardiomyocytes,Central memory cytotoxic T cells,Central memory helper T cells,Cerebellum,Cerebral Cortex,Crypt,Cytotoxic T cells,Dendritic cell…
hsa-miR-1183	miR-1183 (miRNAs w/seed ACUGUAG)	TargetScan Human	High (predicted)	CXCL11	C-X-C motif chemokine ligand 11	Cancer,Cardiovascular Disease,Connective Tissue Disorders,Dermatological Diseases and Conditions,Endocrine System Disorders,Gastrointestinal Disease,Hematological Disease,Hepatic System Disease,Hypersensitivity Response,Immunological Disease,Infectious Disease,Inflammatory Disease,Inflammatory Response,Nutritional Disease,Organismal Injury and Abnormalities,Reproductive System Disease,Respiratory…	Extracellular Space	cytokine	Agranulocyte Adhesion and Diapedesis,Granulocyte Adhesion and Diapedesis,IL-17A Signaling in Gastric Cells,Macrophage Classical Activation Signaling Pathway,Pathogen Induced Cytokine Storm Signaling Pathway,Pathogenesis of Multiple Sclerosis	Human,Rat	Activated helper T cells,Adipocytes,Adipose,B lymphocytes not otherwise specified,Cardiomyocytes,Dermis,Endothelial cells not otherwise specified,Epidermis,Fibroblasts,Heart,Hepatocytes,Keratinocytes,Langerhans cells,Liver,Lung,Macrophages not otherwise specified,Mammary Gland,Microglia,Monocytes not otherwise specified,Other Cells,Other Epithelial cells,Other Organ Systems,Pancreas,Peripheral bl…
hsa-miR-1183	miR-1183 (miRNAs w/seed ACUGUAG)	TargetScan Human	High (predicted)	DENR	density regulated re-initiation and release factor	Cancer,Dermatological Diseases and Conditions,Endocrine System Disorders,Gastrointestinal Disease,Hepatic System Disease,Organismal Injury and Abnormalities,Reproductive System Disease	Other	other		Human,Mouse,Rat	Activated CD56bright NK cells,Activated CD56dim NK cells,Activated helper T cells,Activated Vd1 Gamma-delta T cells,Activated Vd2 Gamma-delta T cells,Adipocytes,Adipose,Amygdala,Astrocytes,B lymphocytes not otherwise specified,BDCA-1+ dendritic cells,BDCA-3+ dendritic cells,Cardiomyocytes,Central memory cytotoxic T cells,Central memory helper T cells,Crypt,Cytotoxic T cells,Dendritic cells not ot…
hsa-miR-1183	miR-1183 (miRNAs w/seed ACUGUAG)	TargetScan Human	High (predicted)	DONSON	DNA replication fork stabilization factor DONSON	Cancer,Connective Tissue Disorders,Developmental Disorder,Endocrine System Disorders,Gastrointestinal Disease,Hereditary Disorder,Neurological Disease,Organismal Injury and Abnormalities,Psychological Disorders,Skeletal and Muscular Disorders	Extracellular Space	other		Human,Mouse,Rat	Adipocytes,Adipose,Astrocytes,B lymphocytes not otherwise specified,Cardiomyocytes,Crypt,Dendritic cells not otherwise specified,Dermis,Endothelial cells not otherwise specified,Epidermis,Fibroblasts,Granulocytes not otherwise specified,Granulosa cells,Heart,Hematopoietic progenitor cells,Hepatocytes,Keratinocytes,Kidney,Langerhans cells,Liver,Lung,Macrophages not otherwise specified,Mammary Glan…
hsa-miR-1183	miR-1183 (miRNAs w/seed ACUGUAG)	TargetScan Human	High (predicted)	EGLN1	egl-9 family hypoxia inducible factor 1	Cancer,Cardiovascular Disease,Connective Tissue Disorders,Developmental Disorder,Endocrine System Disorders,Gastrointestinal Disease,Hematological Disease,Hepatic System Disease,Hereditary Disorder,Immunological Disease,Infectious Disease,Inflammatory Response,Metabolic Disease,Neurological Disease,Organismal Injury and Abnormalities,Psychological Disorders,Renal and Urological Disease,Reproducti…	Cytoplasm	enzyme	HIF1α Signaling	Human,Mouse,Rat	Activated helper T cells,Adipocytes,Adipose,Astrocytes,B lymphocytes not otherwise specified,BDCA-1+ dendritic cells,BDCA-3+ dendritic cells,Beta islet cells,Cardiomyocytes,Central memory cytotoxic T cells,Cerebellum,Crypt,Dendritic cells not otherwise specified,Dermis,Dorsal Root Ganglion,Effector memory cytotoxic T cells,Effector memory RA+ cytotoxic T cells,Effector T cells,Endothelial cells n…
hsa-miR-1183	miR-1183 (miRNAs w/seed ACUGUAG)	TargetScan Human	High (predicted)	EMC2	ER membrane protein complex subunit 2	Cancer,Cardiovascular Disease,Developmental Disorder,Endocrine System Disorders,Hereditary Disorder,Metabolic Disease,Ophthalmic Disease,Organismal Injury and Abnormalities,Reproductive System Disease,Respiratory Disease,Skeletal and Muscular Disorders	Nucleus	other		Human,Mouse,Rat	Activated CD56bright NK cells,Activated CD56dim NK cells,Activated helper T cells,Activated Vd1 Gamma-delta T cells,Activated Vd2 Gamma-delta T cells,Adipocytes,Adipose,Amygdala,Astrocytes,B lymphocytes not otherwise specified,BDCA-1+ dendritic cells,BDCA-3+ dendritic cells,Bladder,Cardiomyocytes,Central memory cytotoxic T cells,Central memory helper T cells,Cerebellum,Cerebral Cortex,Crypt,Cytot…
hsa-miR-1183	miR-1183 (miRNAs w/seed ACUGUAG)	TargetScan Human	High (predicted)	F2R	coagulation factor II thrombin receptor	Cancer,Cardiovascular Disease,Connective Tissue Disorders,Dermatological Diseases and Conditions,Developmental Disorder,Endocrine System Disorders,Gastrointestinal Disease,Hematological Disease,Hepatic System Disease,Hereditary Disorder,Hypersensitivity Response,Immunological Disease,Infectious Disease,Inflammatory Disease,Inflammatory Response,Metabolic Disease,Neurological Disease,Nutritional D…	Plasma Membrane	G-protein coupled receptor	Actin Cytoskeleton Signaling,Breast Cancer Regulation by Stathmin1,Clathrin-mediated Endocytosis Signaling,Coagulation System,CREB Signaling in Neurons,FAK Signaling,G-Protein Coupled Receptor Signaling,Glioma Invasiveness Signaling,Granzyme A Signaling,Gα12/13 Signaling,p70S6K Signaling,Phagosome Formation,Pulmonary Fibrosis Idiopathic Signaling Pathway,Role of Tissue Factor in Cancer,S100 Famil…	Human,Mouse,Rat	Adipocytes,Adipose,Astrocytes,B lymphocytes not otherwise specified,Bladder,Blood platelets,Brain,Cardiomyocytes,Crypt,Cytotoxic T cells,Dendritic cells not otherwise specified,Dermis,Dorsal Root Ganglion,Effector memory cytotoxic T cells,Effector memory RA+ cytotoxic T cells,Effector T cells,Endothelial cells not otherwise specified,Epidermis,Epithelial cells not otherwise specified,Fibroblasts,…
hsa-miR-1183	miR-1183 (miRNAs w/seed ACUGUAG)	TargetScan Human	High (predicted)	FAM83D	family with sequence similarity 83 member D	Cancer,Dermatological Diseases and Conditions,Endocrine System Disorders,Gastrointestinal Disease,Hepatic System Disease,Organismal Injury and Abnormalities,Reproductive System Disease	Cytoplasm	other		Human,Mouse,Rat	Activated helper T cells,Adipocytes,Adipose,Astrocytes,B lymphocytes not otherwise specified,BDCA-1+ dendritic cells,BDCA-3+ dendritic cells,Bladder,Cardiomyocytes,Central memory cytotoxic T cells,Crypt,Dendritic cells not otherwise specified,Dermis,Effector memory cytotoxic T cells,Effector memory RA+ cytotoxic T cells,Endothelial cells not otherwise specified,Epidermis,Fibroblasts,Granulosa cel…
hsa-miR-1183	miR-1183 (miRNAs w/seed ACUGUAG)	TargetScan Human	High (predicted)	FAM9A	family with sequence similarity 9 member A	Cancer,Endocrine System Disorders,Gastrointestinal Disease,Organismal Injury and Abnormalities,Renal and Urological Disease,Reproductive System Disease	Nucleus	other		Human	Cardiomyocytes,Endothelial cells not otherwise specified,Heart,Sertoli cells,Testis
hsa-miR-1183	miR-1183 (miRNAs w/seed ACUGUAG)	TargetScan Human	High (predicted)	FAR1	fatty acyl-CoA reductase 1	Cancer,Dermatological Diseases and Conditions,Endocrine System Disorders,Gastrointestinal Disease,Hereditary Disorder,Metabolic Disease,Organismal Injury and Abnormalities,Respiratory Disease	Cytoplasm	enzyme		Human,Mouse,Rat	Activated helper T cells,Adipocytes,Adipose,Adrenal Gland,Amygdala,Astrocytes,B lymphocytes not otherwise specified,BDCA-1+ dendritic cells,BDCA-3+ dendritic cells,Bladder,Brain,Cardiomyocytes,Central memory cytotoxic T cells,Cerebellum,Cerebral Cortex,Crypt,Cytotoxic T cells,Dendritic cells not otherwise specified,Dermis,Dorsal Root Ganglion,Effector memory cytotoxic T cells,Effector memory RA+ …
hsa-miR-1183	miR-1183 (miRNAs w/seed ACUGUAG)	TargetScan Human	High (predicted)	FUT1	fucosyltransferase 1 (H blood group)	Cancer,Endocrine System Disorders,Gastrointestinal Disease,Organismal Injury and Abnormalities,Reproductive System Disease	Cytoplasm	enzyme		Human,Mouse,Rat	Adipocytes,Adipose,BDCA-1+ dendritic cells,BDCA-3+ dendritic cells,Cardiomyocytes,Central memory cytotoxic T cells,Dermis,Effector memory cytotoxic T cells,Effector memory RA+ cytotoxic T cells,Endothelial cells not otherwise specified,Epidermis,Fibroblasts,Granulocytes not otherwise specified,Heart,Hematopoietic progenitor cells,Immature monocyte-derived dendritic cells,Keratinocytes,Kidney,Lang…
hsa-miR-1183	miR-1183 (miRNAs w/seed ACUGUAG)	TargetScan Human	High (predicted)	GSTA5	glutathione S-transferase alpha 5	Cancer,Dermatological Diseases and Conditions,Endocrine System Disorders,Gastrointestinal Disease,Hepatic System Disease,Metabolic Disease,Organismal Injury and Abnormalities,Renal and Urological Disease,Respiratory Disease	Cytoplasm	enzyme	Androgen Biosynthesis,Apelin Adipocyte Signaling Pathway,Aryl Hydrocarbon Receptor Signaling,Glucocorticoid Biosynthesis,Glutathione Redox Reactions I,Glutathione-mediated Detoxification,LPS/IL-1 Mediated Inhibition of RXR Function,Mineralocorticoid Biosynthesis,Mitochondrial Dysfunction,NRF2-mediated Oxidative Stress Response,Xenobiotic Metabolism AHR Signaling Pathway,Xenobiotic Metabolism CAR …	Human,Mouse,Rat	Kidney,Liver,Lung,Mammary Gland,Other Cells,Other Epithelial cells,Other Nervous System,Other Organ Systems,Prostate Gland,Small Intestine,Smooth Muscle,Smooth muscle cells not otherwise specified,Testis,Uterus
hsa-miR-1183	miR-1183 (miRNAs w/seed ACUGUAG)	TargetScan Human	High (predicted)	IL20RB	interleukin 20 receptor subunit beta	Cancer,Connective Tissue Disorders,Dermatological Diseases and Conditions,Endocrine System Disorders,Gastrointestinal Disease,Immunological Disease,Inflammatory Disease,Inflammatory Response,Neurological Disease,Organismal Injury and Abnormalities,Skeletal and Muscular Disorders	Plasma Membrane	other	Cardiac Hypertrophy Signaling (Enhanced),FAK Signaling,Glucocorticoid Receptor Signaling,PI3K/AKT Signaling,STAT3 Pathway	Human,Mouse,Rat	Adipocytes,Adipose,Astrocytes,BDCA-1+ dendritic cells,Cardiomyocytes,Central memory cytotoxic T cells,Cerebellum,Crypt,Dendritic cells not otherwise specified,Dermis,Effector memory cytotoxic T cells,Endothelial cells not otherwise specified,Epidermis,Epithelial cells not otherwise specified,Fibroblasts,Granulosa cells,Heart,Hepatocytes,Keratinocytes,Kidney,Langerhans cells,Large Intestine,Liver,…
hsa-miR-1183	miR-1183 (miRNAs w/seed ACUGUAG)	TargetScan Human	High (predicted)	KNSTRN	kinetochore localized astrin (SPAG5) binding protein	Cancer,Connective Tissue Disorders,Dermatological Diseases and Conditions,Developmental Disorder,Endocrine System Disorders,Gastrointestinal Disease,Hereditary Disorder,Immunological Disease,Neurological Disease,Ophthalmic Disease,Organismal Injury and Abnormalities,Renal and Urological Disease,Reproductive System Disease,Skeletal and Muscular Disorders	Cytoplasm	other		Human,Mouse,Rat	Activated helper T cells,Adipocytes,Adipose,Astrocytes,B lymphocytes not otherwise specified,BDCA-1+ dendritic cells,BDCA-3+ dendritic cells,Cardiomyocytes,Central memory cytotoxic T cells,Crypt,Dendritic cells not otherwise specified,Dermis,Effector memory cytotoxic T cells,Effector memory RA+ cytotoxic T cells,Endothelial cells not otherwise specified,Epidermis,Fibroblasts,Granulocytes not othe…
hsa-miR-1183	miR-1183 (miRNAs w/seed ACUGUAG)	TargetScan Human	High (predicted)	LGI1	leucine rich glioma inactivated 1	Cancer,Dermatological Diseases and Conditions,Developmental Disorder,Endocrine System Disorders,Gastrointestinal Disease,Hepatic System Disease,Hereditary Disorder,Inflammatory Disease,Inflammatory Response,Neurological Disease,Organismal Injury and Abnormalities,Reproductive System Disease	Plasma Membrane	other		Human,Mouse,Rat	Adipocytes,Adipose,Amygdala,Astrocytes,B lymphocytes not otherwise specified,Brain,Brainstem,Cardiomyocytes,Caudate Nucleus,Cerebellum,Cerebral Cortex,Corpus Callosum,Dermis,Dorsal Root Ganglion,Endothelial cells not otherwise specified,Epidermis,Fibroblasts,Granule cells,Heart,Hepatocytes,Hippocampus,Hypothalamus,Keratinocytes,Langerhans cells,Liver,Lung,Mammary Gland,Medulla Oblongata,Microglia…
hsa-miR-1183	miR-1183 (miRNAs w/seed ACUGUAG)	TargetScan Human	High (predicted)	LINC02860	long intergenic non-protein coding RNA 2860		Other	other		Human
hsa-miR-1183	miR-1183 (miRNAs w/seed ACUGUAG)	TargetScan Human	High (predicted)	LOC389602	uncharacterized LOC389602		Other	other		Human
hsa-miR-1183	miR-1183 (miRNAs w/seed ACUGUAG)	TargetScan Human	High (predicted)	MAP3K1	mitogen-activated protein kinase kinase kinase 1	Cancer,Cardiovascular Disease,Connective Tissue Disorders,Dermatological Diseases and Conditions,Developmental Disorder,Endocrine System Disorders,Gastrointestinal Disease,Hematological Disease,Hepatic System Disease,Hereditary Disorder,Immunological Disease,Inflammatory Response,Neurological Disease,Ophthalmic Disease,Organismal Injury and Abnormalities,Renal and Urological Disease,Reproductive …	Cytoplasm	kinase	Activin Inhibin Signaling Pathway,Acute Phase Response Signaling,April Mediated Signaling,B Cell Activating Factor Signaling,B Cell Receptor Signaling,Cardiac Hypertrophy Signaling,Cardiac Hypertrophy Signaling (Enhanced),CD27 Signaling in Lymphocytes,CD28 Signaling in T Helper Cells,Ceramide Signaling,EGF Signaling,FGF Signaling,G-Protein Coupled Receptor Signaling,Germ Cell-Sertoli Cell Junctio…	Human,Mouse,Rat	Activated helper T cells,Adipocytes,Adipose,Amygdala,Astrocytes,B lymphocytes not otherwise specified,BDCA-1+ dendritic cells,BDCA-3+ dendritic cells,Bladder,Cardiomyocytes,Central memory cytotoxic T cells,Central memory helper T cells,Cerebellum,Cerebral Cortex,Crypt,Cytotoxic T cells,Dendritic cells not otherwise specified,Dermis,Dorsal Root Ganglion,Effector memory cytotoxic T cells,Effector m…
hsa-miR-1183	miR-1183 (miRNAs w/seed ACUGUAG)	TargetScan Human	High (predicted)	MSTN	myostatin	Cancer,Cardiovascular Disease,Connective Tissue Disorders,Dermatological Diseases and Conditions,Developmental Disorder,Endocrine System Disorders,Gastrointestinal Disease,Hereditary Disorder,Inflammatory Disease,Inflammatory Response,Metabolic Disease,Nutritional Disease,Organismal Injury and Abnormalities,Renal and Urological Disease,Reproductive System Disease,Skeletal and Muscular Disorders	Extracellular Space	growth factor		Human,Mouse,Rat	Adipocytes,Adipose,Astrocytes,Brain,Cardiomyocytes,Cartilage Tissue,Chondrocytes,Dermis,Endothelial cells not otherwise specified,Epidermis,Fibroblasts,Granulosa cells,Heart,Kidney,Macrophages not otherwise specified,Mammary Gland,Neurons not otherwise specified,Olfactory Bulb,Other Cells,Other Nervous System,Other Neurons,Other Organ Systems,Other Tissues and Primary Cells,Ovary,Placenta,Prostat…
hsa-miR-1183	miR-1183 (miRNAs w/seed ACUGUAG)	TargetScan Human	High (predicted)	MTRNR2L7	MT-RNR2 like 7 (pseudogene)		Other	other	Chaperone Mediated Autophagy Signaling Pathway	Human	Cardiomyocytes,Dermis,Endothelial cells not otherwise specified,Fibroblasts,Heart,Keratinocytes,Kidney,Langerhans cells,Macrophages not otherwise specified,Other Epithelial cells,Other Organ Systems,Ovary,Prostate Gland,Skeletal Muscle,Skin,Smooth Muscle,Smooth muscle cells not otherwise specified
hsa-miR-1183	miR-1183 (miRNAs w/seed ACUGUAG)	TargetScan Human	High (predicted)	MYH8	myosin heavy chain 8	Cancer,Cardiovascular Disease,Connective Tissue Disorders,Dermatological Diseases and Conditions,Developmental Disorder,Endocrine System Disorders,Gastrointestinal Disease,Hematological Disease,Hepatic System Disease,Hereditary Disorder,Immunological Disease,Neurological Disease,Organismal Injury and Abnormalities,Psychological Disorders,Renal and Urological Disease,Reproductive System Disease,Re…	Cytoplasm	enzyme	Actin Cytoskeleton Signaling,Agranulocyte Adhesion and Diapedesis,Calcium Signaling,Cellular Effects of Sildenafil (Viagra),Dilated Cardiomyopathy Signaling Pathway,Hepatic Fibrosis / Hepatic Stellate Cell Activation,ILK Signaling,Oxytocin Signaling Pathway,Phagosome Formation,RHOGDI Signaling,SNARE Signaling Pathway,Tight Junction Signaling	Human,Mouse,Rat	Adipose,Amygdala,B lymphocytes not otherwise specified,Bladder,Cardiomyocytes,CD56bright NK cells,Cerebellum,Cerebral Cortex,Cytotoxic T cells,Dorsal Root Ganglion,Effector T cells,Epidermis,Fibroblasts,Heart,Hypothalamus,Kidney,Large Intestine,Lung,Macrophages not otherwise specified,Mammary Gland,Olfactory Bulb,Other Cells,Other Nervous System,Other Neurons,Other Organ Systems,Ovary,Pituitary G…
hsa-miR-1183	miR-1183 (miRNAs w/seed ACUGUAG)	TargetScan Human	High (predicted)	NBR1	NBR1 autophagy cargo receptor	Cancer,Endocrine System Disorders,Gastrointestinal Disease,Hepatic System Disease,Hereditary Disorder,Immunological Disease,Inflammatory Disease,Inflammatory Response,Neurological Disease,Organismal Injury and Abnormalities,Respiratory Disease,Skeletal and Muscular Disorders	Cytoplasm	other		Human,Mouse,Rat	Adipocytes,Adipose,Amygdala,Astrocytes,B lymphocytes not otherwise specified,Bladder,Cardiomyocytes,Central memory cytotoxic T cells,Cerebellum,Cerebral Cortex,Crypt,Cytotoxic T cells,Dendritic cells not otherwise specified,Dermis,Dorsal Root Ganglion,Effector memory cytotoxic T cells,Effector memory RA+ cytotoxic T cells,Effector T cells,Endothelial cells not otherwise specified,Epidermis,Fibrob…
hsa-miR-1183	miR-1183 (miRNAs w/seed ACUGUAG)	TargetScan Human	High (predicted)	NETO1	neuropilin and tolloid like 1	Cancer,Dermatological Diseases and Conditions,Developmental Disorder,Endocrine System Disorders,Gastrointestinal Disease,Hematological Disease,Hepatic System Disease,Hereditary Disorder,Immunological Disease,Neurological Disease,Organismal Injury and Abnormalities,Psychological Disorders,Reproductive System Disease,Respiratory Disease	Extracellular Space	other		Human,Mouse,Rat	Adipocytes,Adipose,Astrocytes,B lymphocytes not otherwise specified,Cardiomyocytes,Endothelial cells not otherwise specified,Fibroblasts,Heart,Microglia,Other Cells,Other Epithelial cells,Other Nervous System,Other Neurons,Retina,Smooth Muscle,Smooth muscle cells not otherwise specified,Testis
hsa-miR-1183	miR-1183 (miRNAs w/seed ACUGUAG)	TargetScan Human	High (predicted)	NTF3	neurotrophin 3	Auditory Disease,Cancer,Cardiovascular Disease,Connective Tissue Disorders,Dermatological Diseases and Conditions,Developmental Disorder,Endocrine System Disorders,Gastrointestinal Disease,Hepatic System Disease,Hereditary Disorder,Immunological Disease,Infectious Disease,Inflammatory Disease,Inflammatory Response,Metabolic Disease,Neurological Disease,Nutritional Disease,Ophthalmic Disease,Organ…	Extracellular Space	growth factor	Axonal Guidance Signaling,Human Embryonic Stem Cell Pluripotency,Myelination Signaling Pathway,Neuroinflammation Signaling Pathway,Neurotrophin/TRK Signaling,S100 Family Signaling Pathway,Thyroid Cancer Signaling	Human,Mouse,Rat	Adipocytes,Adipose,Astrocytes,Brain,Cardiomyocytes,Cerebellum,Cerebral Cortex,Crypt,Dermis,Dorsal Root Ganglion,Endothelial cells not otherwise specified,Eosinophils,Epidermis,Epithelial cells not otherwise specified,Fibroblasts,Granule Cell Layer,Granule cells,Heart,Hepatocytes,Hippocampus,Keratinocytes,Kidney,Langerhans cells,Liver,Lung,Lymph node,Macrophages not otherwise specified,Mammary Gla…
hsa-miR-1183	miR-1183 (miRNAs w/seed ACUGUAG)	TargetScan Human	High (predicted)	PAPOLA	poly(A) polymerase alpha	Cancer,Dermatological Diseases and Conditions,Developmental Disorder,Endocrine System Disorders,Gastrointestinal Disease,Hepatic System Disease,Hereditary Disorder,Metabolic Disease,Neurological Disease,Organismal Injury and Abnormalities,Reproductive System Disease	Nucleus	enzyme	Cleavage and Polyadenylation of Pre-mRNA,Inhibition of ARE-Mediated mRNA Degradation Pathway	Human,Mouse,Rat	Activated CD56bright NK cells,Activated CD56dim NK cells,Activated helper T cells,Activated Vd1 Gamma-delta T cells,Activated Vd2 Gamma-delta T cells,Adipocytes,Adipose,Amygdala,Astrocytes,B lymphocytes not otherwise specified,BDCA-1+ dendritic cells,BDCA-3+ dendritic cells,Bladder,Cardiomyocytes,CD56bright NK cells,CD56dim NK cells,Central memory cytotoxic T cells,Central memory helper T cells,C…
hsa-miR-1183	miR-1183 (miRNAs w/seed ACUGUAG)	TargetScan Human	High (predicted)	PAPOLG	poly(A) polymerase gamma	Cancer,Endocrine System Disorders,Gastrointestinal Disease,Hematological Disease,Hepatic System Disease,Immunological Disease,Organismal Injury and Abnormalities,Reproductive System Disease,Respiratory Disease	Nucleus	enzyme	Inhibition of ARE-Mediated mRNA Degradation Pathway	Human,Mouse,Rat	Activated CD56bright NK cells,Activated helper T cells,Activated Vd1 Gamma-delta T cells,Activated Vd2 Gamma-delta T cells,Adipocytes,Adipose,Amygdala,Astrocytes,B lymphocytes not otherwise specified,BDCA-1+ dendritic cells,BDCA-3+ dendritic cells,Bladder,Brain,Cardiomyocytes,Central memory cytotoxic T cells,Central memory helper T cells,Cerebellum,Cerebral Cortex,Crypt,Cytotoxic T cells,Dendriti…
hsa-miR-1183	miR-1183 (miRNAs w/seed ACUGUAG)	TargetScan Human	High (predicted)	PCNX1	pecanex 1	Cancer,Dermatological Diseases and Conditions,Endocrine System Disorders,Gastrointestinal Disease,Hematological Disease,Immunological Disease,Neurological Disease,Organismal Injury and Abnormalities,Reproductive System Disease	Plasma Membrane	other		Human,Mouse,Rat	Activated CD56bright NK cells,Activated CD56dim NK cells,Activated helper T cells,Activated Vd1 Gamma-delta T cells,Activated Vd2 Gamma-delta T cells,Adipocytes,Adipose,Amygdala,B lymphocytes not otherwise specified,BDCA-1+ dendritic cells,BDCA-3+ dendritic cells,Bladder,CD56bright NK cells,Central memory cytotoxic T cells,Central memory helper T cells,Cerebellum,Cerebral Cortex,Cytotoxic T cells…
hsa-miR-1183	miR-1183 (miRNAs w/seed ACUGUAG)	TargetScan Human	High (predicted)	PEA15	proliferation and apoptosis adaptor protein 15	Cancer,Dermatological Diseases and Conditions,Endocrine System Disorders,Gastrointestinal Disease,Immunological Disease,Inflammatory Disease,Metabolic Disease,Neurological Disease,Organismal Injury and Abnormalities,Renal and Urological Disease,Reproductive System Disease,Respiratory Disease,Tumor Morphology	Cytoplasm	transporter	Chaperone Mediated Autophagy Signaling Pathway	Human,Mouse,Rat	Adipocytes,Adipose,Amygdala,Astrocytes,B lymphocytes not otherwise specified,Bladder,Brain,Cardiomyocytes,Cerebellum,Cerebral Cortex,Crypt,Dendritic cells not otherwise specified,Dermis,Dorsal Root Ganglion,Endothelial cells not otherwise specified,Epidermis,Fibroblasts,Granulocytes not otherwise specified,Granulosa cells,Heart,Hematopoietic progenitor cells,Hepatocytes,Hippocampus,Hypothalamus,K…
hsa-miR-1183	miR-1183 (miRNAs w/seed ACUGUAG)	TargetScan Human	High (predicted)	PFKFB1	6-phosphofructo-2-kinase/fructose-2,6-biphosphatase 1	Cancer,Cardiovascular Disease,Dermatological Diseases and Conditions,Endocrine System Disorders,Gastrointestinal Disease,Hematological Disease,Hereditary Disorder,Immunological Disease,Neurological Disease,Organismal Injury and Abnormalities,Psychological Disorders,Respiratory Disease,Skeletal and Muscular Disorders	Cytoplasm	kinase	AMPK Signaling,Glucocorticoid Receptor Signaling	Human,Mouse,Rat	Adipocytes,Adipose,Amygdala,Astrocytes,B lymphocytes not otherwise specified,Bladder,Cardiomyocytes,Cerebellum,Cerebral Cortex,Crypt,Cytotoxic T cells,Dorsal Root Ganglion,Effector T cells,Epidermis,Heart,Hepatocytes,Hippocampus,Hypothalamus,Kidney,Large Intestine,Liver,Lung,Mammary Gland,Olfactory Bulb,Other Cells,Other Epithelial cells,Other Nervous System,Other Neurons,Other Organ Systems,Ovar…
hsa-miR-1183	miR-1183 (miRNAs w/seed ACUGUAG)	TargetScan Human	High (predicted)	PMEPA1	prostate transmembrane protein, androgen induced 1	Cancer,Cardiovascular Disease,Dermatological Diseases and Conditions,Endocrine System Disorders,Gastrointestinal Disease,Hematological Disease,Hepatic System Disease,Hereditary Disorder,Immunological Disease,Inflammatory Disease,Neurological Disease,Organismal Injury and Abnormalities,Psychological Disorders,Reproductive System Disease,Skeletal and Muscular Disorders	Plasma Membrane	other	Activin Inhibin Signaling Pathway,TGF-β Signaling	Human,Mouse,Rat	Adipocytes,Adipose,Amygdala,Astrocytes,B lymphocytes not otherwise specified,Bladder,Brain,Cardiomyocytes,CD4+ T-lymphocytes,Cells not otherwise specified,Central memory cytotoxic T cells,Cerebellum,Cerebral Cortex,Crypt,Dendritic cells not otherwise specified,Dermis,Dorsal Root Ganglion,Effector memory cytotoxic T cells,Effector memory RA+ cytotoxic T cells,Endothelial cells not otherwise specif…
hsa-miR-1183	miR-1183 (miRNAs w/seed ACUGUAG)	TargetScan Human	High (predicted)	POLR2K	RNA polymerase II, I and III subunit K	Cancer,Cardiovascular Disease,Gastrointestinal Disease,Infectious Disease,Organismal Injury and Abnormalities	Nucleus	enzyme	Androgen Signaling,Assembly of RNA Polymerase II Complex,CREB Signaling in Neurons,Glucocorticoid Receptor Signaling,Hereditary Breast Cancer Signaling,Huntington's Disease Signaling,MicroRNA Biogenesis Signaling Pathway,NAD Signaling Pathway,NER (Nucleotide Excision Repair, Enhanced Pathway),Nucleotide Excision Repair Pathway	Human,Mouse,Rat	Activated CD56bright NK cells,Activated CD56dim NK cells,Activated helper T cells,Activated Vd1 Gamma-delta T cells,Activated Vd2 Gamma-delta T cells,Adipocytes,Adipose,Amygdala,Astrocytes,B lymphocytes not otherwise specified,BDCA-1+ dendritic cells,BDCA-3+ dendritic cells,Bladder,Cardiomyocytes,CD56bright NK cells,CD56dim NK cells,Central memory cytotoxic T cells,Central memory helper T cells,C…
hsa-miR-1183	miR-1183 (miRNAs w/seed ACUGUAG)	TargetScan Human	High (predicted)	PRSS42P	serine protease 42, pseudogene		Other	other		Human,Mouse,Rat	Cardiomyocytes,Heart,Other Epithelial cells,Prostate Gland,Testis
hsa-miR-1183	miR-1183 (miRNAs w/seed ACUGUAG)	TargetScan Human	High (predicted)	RAP2A	RAP2A, member of RAS oncogene family	Cancer,Endocrine System Disorders,Neurological Disease,Organismal Injury and Abnormalities	Plasma Membrane	enzyme	14-3-3-mediated Signaling,Actin Cytoskeleton Signaling,Actin Nucleation by ARP-WASP Complex,Acute Myeloid Leukemia Signaling,Acute Phase Response Signaling,Adrenomedullin signaling pathway,Agrin Interactions at Neuromuscular Junction,Angiopoietin Signaling,Antiproliferative Role of Somatostatin Receptor 2,Apelin Endothelial Signaling Pathway,Apoptosis Signaling,Axonal Guidance Signaling,B Cell Re…	Human,Mouse	Activated CD56bright NK cells,Activated CD56dim NK cells,Activated helper T cells,Activated Vd1 Gamma-delta T cells,Activated Vd2 Gamma-delta T cells,Adipocytes,Adipose,Amygdala,Astrocytes,B lymphocytes not otherwise specified,BDCA-1+ dendritic cells,BDCA-3+ dendritic cells,Cardiomyocytes,Central memory cytotoxic T cells,Central memory helper T cells,Cerebral Cortex,Crypt,Cytotoxic T cells,Dendri…
hsa-miR-1183	miR-1183 (miRNAs w/seed ACUGUAG)	TargetScan Human	High (predicted)	RASSF8	Ras association domain family member 8	Cancer,Connective Tissue Disorders,Dermatological Diseases and Conditions,Endocrine System Disorders,Gastrointestinal Disease,Immunological Disease,Inflammatory Disease,Inflammatory Response,Neurological Disease,Organismal Injury and Abnormalities,Reproductive System Disease,Skeletal and Muscular Disorders	Extracellular Space	other		Human,Mouse,Rat	Adipocytes,Adipose,Astrocytes,B lymphocytes not otherwise specified,BDCA-1+ dendritic cells,BDCA-3+ dendritic cells,Bladder,Cardiomyocytes,Dendritic cells not otherwise specified,Dermis,Endothelial cells not otherwise specified,Epidermis,Fibroblasts,Granulocytes not otherwise specified,Granulosa cells,Heart,Hepatocytes,Hypothalamus,Keratinocytes,Kidney,Langerhans cells,Liver,Lung,Macrophages not …
hsa-miR-1183	miR-1183 (miRNAs w/seed ACUGUAG)	TargetScan Human	High (predicted)	RP11_475I249			Other	other		Human
hsa-miR-1183	miR-1183 (miRNAs w/seed ACUGUAG)	TargetScan Human	High (predicted)	RP5_1052I52			Other	other		Human
hsa-miR-1183	miR-1183 (miRNAs w/seed ACUGUAG)	TargetScan Human	High (predicted)	RTL9	retrotransposon Gag like 9	Cancer,Dermatological Diseases and Conditions,Gastrointestinal Disease,Hematological Disease,Hereditary Disorder,Immunological Disease,Neurological Disease,Organismal Injury and Abnormalities,Renal and Urological Disease,Reproductive System Disease,Respiratory Disease	Other	other		Human,Mouse,Rat	Fibroblasts,Granulosa cells,Mammary Gland,Natural T-regulatory cells,Ovary,Placenta,Thymus,Uterus
hsa-miR-1183	miR-1183 (miRNAs w/seed ACUGUAG)	TargetScan Human	High (predicted)	SELENOF	selenoprotein F	Cancer,Endocrine System Disorders,Gastrointestinal Disease,Neurological Disease,Ophthalmic Disease,Organismal Injury and Abnormalities,Psychological Disorders,Skeletal and Muscular Disorders	Cytoplasm	enzyme		Human,Mouse,Rat	Activated CD56bright NK cells,Activated CD56dim NK cells,Activated helper T cells,Activated Vd1 Gamma-delta T cells,Activated Vd2 Gamma-delta T cells,Adipocytes,Adipose,Amygdala,B lymphocytes not otherwise specified,BDCA-1+ dendritic cells,BDCA-3+ dendritic cells,Bladder,Brain,Brainstem,CD56bright NK cells,CD56dim NK cells,Central memory cytotoxic T cells,Central memory helper T cells,Cerebellum,…
hsa-miR-1183	miR-1183 (miRNAs w/seed ACUGUAG)	TargetScan Human	High (predicted)	SGIP1	SH3GL interacting endocytic adaptor 1	Cancer,Dermatological Diseases and Conditions,Endocrine System Disorders,Gastrointestinal Disease,Metabolic Disease,Organismal Injury and Abnormalities,Renal and Urological Disease,Respiratory Disease	Cytoplasm	other		Human,Mouse,Rat	Adipocytes,Adipose,Amygdala,Astrocytes,B lymphocytes not otherwise specified,Bladder,Cardiomyocytes,Cerebellum,Cerebral Cortex,Cytotoxic T cells,Dermis,Dorsal Root Ganglion,Effector T cells,Endothelial cells not otherwise specified,Epidermis,Fibroblasts,Granulocytes not otherwise specified,Heart,Hepatocytes,Hippocampus,Hypothalamus,Keratinocytes,Kidney,Langerhans cells,Large Intestine,Liver,Lung,…
hsa-miR-1183	miR-1183 (miRNAs w/seed ACUGUAG)	TargetScan Human	High (predicted)	SHTN1	shootin 1	Cancer,Cardiovascular Disease,Endocrine System Disorders,Gastrointestinal Disease,Hepatic System Disease,Neurological Disease,Organismal Injury and Abnormalities,Reproductive System Disease,Respiratory Disease	Plasma Membrane	other		Human,Mouse,Rat	Adipocytes,Adipose,Amygdala,B lymphocytes not otherwise specified,Bladder,Cardiomyocytes,Cerebellum,Cerebral Cortex,Crypt,Dendritic cells not otherwise specified,Dorsal Root Ganglion,Endothelial cells not otherwise specified,Epidermis,Fibroblasts,Granulocytes not otherwise specified,Granulosa cells,Heart,Hematopoietic progenitor cells,Hepatocytes,Hippocampus,Hypothalamus,Kidney,Large Intestine,Li…
hsa-miR-1183	miR-1183 (miRNAs w/seed ACUGUAG)	TargetScan Human	High (predicted)	SMCO1	single-pass membrane protein with coiled-coil domains 1	Cancer,Dermatological Diseases and Conditions,Organismal Injury and Abnormalities,Reproductive System Disease,Respiratory Disease	Other	other		Human,Mouse,Rat	Astrocytes,Cardiomyocytes,Endothelial cells not otherwise specified,Fibroblasts,Heart,Microglia,Other Cells,Other Epithelial cells,Other Nervous System,Other Neurons,Other Organ Systems,Prostate Gland,Skeletal Muscle,Smooth Muscle,Smooth muscle cells not otherwise specified,Testis
hsa-miR-1183	miR-1183 (miRNAs w/seed ACUGUAG)	TargetScan Human	High (predicted)	SMPX	small muscle protein X-linked	Auditory Disease,Cancer,Endocrine System Disorders,Gastrointestinal Disease,Hepatic System Disease,Hereditary Disorder,Neurological Disease,Organismal Injury and Abnormalities,Respiratory Disease	Cytoplasm	other		Human,Mouse,Rat	Amygdala,Astrocytes,B lymphocytes not otherwise specified,Cardiomyocytes,Cerebellum,Cerebral Cortex,Cytotoxic T cells,Dorsal Root Ganglion,Effector T cells,Endothelial cells not otherwise specified,Epidermis,Fibroblasts,Granulosa cells,Heart,Hippocampus,Kidney,Large Intestine,Liver,Lung,Macrophages not otherwise specified,Mammary Gland,Olfactory Bulb,Other Cells,Other Epithelial cells,Other Nervo…
hsa-miR-1183	miR-1183 (miRNAs w/seed ACUGUAG)	TargetScan Human	High (predicted)	SPIDR	scaffold protein involved in DNA repair	Cancer,Dermatological Diseases and Conditions,Endocrine System Disorders,Gastrointestinal Disease,Hematological Disease,Hepatic System Disease,Hereditary Disorder,Immunological Disease,Organismal Injury and Abnormalities,Renal and Urological Disease,Reproductive System Disease,Respiratory Disease	Nucleus	other		Human,Mouse,Rat	Adipocytes,Adipose,Amygdala,Astrocytes,B lymphocytes not otherwise specified,BDCA-1+ dendritic cells,BDCA-3+ dendritic cells,Bladder,Cardiomyocytes,Cerebellum,Crypt,Cytotoxic T cells,Dendritic cells not otherwise specified,Dermis,Dorsal Root Ganglion,Effector memory cytotoxic T cells,Effector T cells,Endothelial cells not otherwise specified,Epidermis,Fibroblasts,Granulocytes not otherwise specif…
hsa-miR-1183	miR-1183 (miRNAs w/seed ACUGUAG)	TargetScan Human	High (predicted)	SPRY2	sprouty RTK signaling antagonist 2	Antimicrobial Response,Auditory Disease,Cancer,Cardiovascular Disease,Connective Tissue Disorders,Dental Disease,Developmental Disorder,Endocrine System Disorders,Gastrointestinal Disease,Hereditary Disorder,Hypersensitivity Response,Immunological Disease,Infectious Disease,Inflammatory Disease,Inflammatory Response,Neurological Disease,Organismal Injury and Abnormalities,Psychological Disorders,…	Plasma Membrane	other	Neurotrophin/TRK Signaling	Human,Mouse,Rat	Activated CD56bright NK cells,Activated CD56dim NK cells,Activated Vd1 Gamma-delta T cells,Activated Vd2 Gamma-delta T cells,Adipocytes,Adipose,Amygdala,Astrocytes,B lymphocytes not otherwise specified,BDCA-1+ dendritic cells,BDCA-3+ dendritic cells,Brain,Cardiomyocytes,CD56dim NK cells,Cerebellum,Cerebral Cortex,Crypt,Dendritic cells not otherwise specified,Dermis,Dorsal Root Ganglion,Effector m…
hsa-miR-1183	miR-1183 (miRNAs w/seed ACUGUAG)	TargetScan Human	High (predicted)	ST6GALNAC3	ST6 N-acetylgalactosaminide alpha-2,6-sialyltransferase 3	Cancer,Connective Tissue Disorders,Endocrine System Disorders,Gastrointestinal Disease,Hematological Disease,Immunological Disease,Inflammatory Disease,Neurological Disease,Organismal Injury and Abnormalities,Renal and Urological Disease,Respiratory Disease	Cytoplasm	enzyme		Human,Mouse,Rat	Activated helper T cells,Adipocytes,Adipose,Astrocytes,B lymphocytes not otherwise specified,Brain,Cardiomyocytes,Crypt,Dendritic cells not otherwise specified,Dermis,Endothelial cells not otherwise specified,Epidermis,Fibroblasts,Granulosa cells,Heart,Hematopoietic progenitor cells,Hepatocytes,Keratinocytes,Kidney,Langerhans cells,Liver,Lung,Macrophages not otherwise specified,Mammary Gland,Mela…
hsa-miR-1183	miR-1183 (miRNAs w/seed ACUGUAG)	TargetScan Human	High (predicted)	STS	steroid sulfatase	Cancer,Dermatological Diseases and Conditions,Developmental Disorder,Endocrine System Disorders,Gastrointestinal Disease,Hematological Disease,Hereditary Disorder,Immunological Disease,Metabolic Disease,Organismal Injury and Abnormalities,Reproductive System Disease	Cytoplasm	enzyme		Human,Rat	Adipocytes,Adipose,Astrocytes,B lymphocytes not otherwise specified,Brain,Cardiomyocytes,Cerebral Ventricles,Choroid Plexus,Crypt,Dendritic cells not otherwise specified,Dermis,Endothelial cells not otherwise specified,Epidermis,Fibroblasts,Granulocytes not otherwise specified,Granulosa cells,Heart,Hematopoietic progenitor cells,Hepatocytes,Hypothalamus,Keratinocytes,Kidney,Langerhans cells,Liver…
hsa-miR-1183	miR-1183 (miRNAs w/seed ACUGUAG)	TargetScan Human	High (predicted)	SUMO4	small ubiquitin like modifier 4	Cancer,Endocrine System Disorders,Gastrointestinal Disease,Hepatic System Disease,Hereditary Disorder,Immunological Disease,Infectious Disease,Metabolic Disease,Organismal Injury and Abnormalities	Other	other	Sumoylation Pathway	Human	Adipocytes,Adipose,B lymphocytes not otherwise specified,Bone marrow cells not otherwise specified,Cardiomyocytes,Crypt,Dendritic cells not otherwise specified,Dermis,Endothelial cells not otherwise specified,Epidermis,Fibroblasts,Granulocytes not otherwise specified,Granulosa cells,Heart,Hematopoietic progenitor cells,Hepatocytes,Immune cells not otherwise specified,Keratinocytes,Kidney,Langerha…
hsa-miR-1183	miR-1183 (miRNAs w/seed ACUGUAG)	TargetScan Human	High (predicted)	TAF2	TATA-box binding protein associated factor 2	Cancer,Connective Tissue Disorders,Dermatological Diseases and Conditions,Developmental Disorder,Endocrine System Disorders,Gastrointestinal Disease,Hepatic System Disease,Hereditary Disorder,Neurological Disease,Organismal Injury and Abnormalities,Respiratory Disease,Skeletal and Muscular Disorders	Nucleus	transcription regulator	Androgen Signaling,Assembly of RNA Polymerase II Complex,Glucocorticoid Receptor Signaling	Human,Mouse,Rat	Activated CD56bright NK cells,Activated CD56dim NK cells,Activated helper T cells,Activated Vd1 Gamma-delta T cells,Activated Vd2 Gamma-delta T cells,Adipocytes,Adipose,Astrocytes,B lymphocytes not otherwise specified,BDCA-1+ dendritic cells,BDCA-3+ dendritic cells,Brain,Cardiomyocytes,CD56bright NK cells,CD56dim NK cells,Central memory cytotoxic T cells,Central memory helper T cells,Crypt,Cytoto…
hsa-miR-1183	miR-1183 (miRNAs w/seed ACUGUAG)	TargetScan Human	High (predicted)	TM9SF3	transmembrane 9 superfamily member 3	Cancer,Endocrine System Disorders,Gastrointestinal Disease,Hepatic System Disease,Organismal Injury and Abnormalities,Respiratory Disease	Cytoplasm	transporter		Human,Mouse,Rat	Activated helper T cells,Adipocytes,Adipose,Amygdala,Astrocytes,B lymphocytes not otherwise specified,BDCA-1+ dendritic cells,BDCA-3+ dendritic cells,Bladder,Cardiomyocytes,Cerebellum,Cerebral Cortex,Crypt,Cytotoxic T cells,Dendritic cells not otherwise specified,Dermis,Dorsal Root Ganglion,Effector memory RA+ cytotoxic T cells,Effector T cells,Endothelial cells not otherwise specified,Epidermis,…
hsa-miR-1183	miR-1183 (miRNAs w/seed ACUGUAG)	TargetScan Human	High (predicted)	TMEFF2	transmembrane protein with EGF like and two follistatin like domains 2	Cancer,Connective Tissue Disorders,Dermatological Diseases and Conditions,Endocrine System Disorders,Gastrointestinal Disease,Hematological Disease,Hepatic System Disease,Immunological Disease,Inflammatory Disease,Inflammatory Response,Metabolic Disease,Organismal Injury and Abnormalities,Renal and Urological Disease,Reproductive System Disease,Skeletal and Muscular Disorders	Cytoplasm	other	Neuregulin Signaling	Human,Mouse	Activated helper T cells,Adipocytes,Adipose,Amygdala,Astrocytes,BDCA-1+ dendritic cells,BDCA-3+ dendritic cells,Brain,Cardiomyocytes,Central memory cytotoxic T cells,Cerebellum,Dermis,Dorsal Root Ganglion,Effector memory cytotoxic T cells,Effector memory RA+ cytotoxic T cells,Endothelial cells not otherwise specified,Epidermis,Fibroblasts,Heart,Hippocampus,Hypothalamus,Immature monocyte-derived d…
hsa-miR-1183	miR-1183 (miRNAs w/seed ACUGUAG)	TargetScan Human	High (predicted)	UBE2E1	ubiquitin conjugating enzyme E2 E1	Cancer,Developmental Disorder,Endocrine System Disorders,Gastrointestinal Disease,Hereditary Disorder,Infectious Disease,Metabolic Disease,Neurological Disease,Organismal Injury and Abnormalities,Renal and Urological Disease	Cytoplasm	enzyme	Hypoxia Signaling in the Cardiovascular System,Protein Ubiquitination Pathway	Human,Mouse,Rat	Activated CD56bright NK cells,Activated CD56dim NK cells,Activated helper T cells,Activated Vd1 Gamma-delta T cells,Activated Vd2 Gamma-delta T cells,Adipocytes,Adipose,Amygdala,Astrocytes,B lymphocytes not otherwise specified,BDCA-1+ dendritic cells,BDCA-3+ dendritic cells,Bladder,Cardiomyocytes,CD56bright NK cells,CD56dim NK cells,Central memory cytotoxic T cells,Central memory helper T cells,C…
hsa-miR-1183	miR-1183 (miRNAs w/seed ACUGUAG)	TargetScan Human	High (predicted)	UBL3	ubiquitin like 3		Cytoplasm	other		Human,Mouse,Rat	Activated CD56bright NK cells,Activated CD56dim NK cells,Activated helper T cells,Activated Vd1 Gamma-delta T cells,Activated Vd2 Gamma-delta T cells,Adipocytes,Adipose,Amygdala,Astrocytes,B lymphocytes not otherwise specified,BDCA-1+ dendritic cells,BDCA-3+ dendritic cells,Bladder,Cardiomyocytes,CD56bright NK cells,CD56dim NK cells,Central memory cytotoxic T cells,Central memory helper T cells,C…
hsa-miR-1183	miR-1183 (miRNAs w/seed ACUGUAG)	TargetScan Human	High (predicted)	XRN2	5'-3' exoribonuclease 2	Cancer,Endocrine System Disorders,Gastrointestinal Disease,Hepatic System Disease,Organismal Injury and Abnormalities,Reproductive System Disease,Respiratory Disease	Nucleus	enzyme		Human,Mouse,Rat	Adipocytes,Adipose,Amygdala,Astrocytes,B lymphocytes not otherwise specified,Bladder,Cardiomyocytes,Cerebellum,Cerebral Cortex,Crypt,Cytotoxic T cells,Dendritic cells not otherwise specified,Dermis,Dorsal Root Ganglion,Effector T cells,Endothelial cells not otherwise specified,Epidermis,Fibroblasts,Granulocytes not otherwise specified,Granulosa cells,Heart,Hematopoietic progenitor cells,Hepatocyt…
hsa-miR-1183	miR-1183 (miRNAs w/seed ACUGUAG)	TargetScan Human	High (predicted)	ZNF791	zinc finger protein 791	Cancer,Dermatological Diseases and Conditions,Endocrine System Disorders,Gastrointestinal Disease,Hepatic System Disease,Infectious Disease,Metabolic Disease,Organismal Injury and Abnormalities,Renal and Urological Disease	Other	other		Human,Mouse	Adipocytes,Adipose,Astrocytes,B lymphocytes not otherwise specified,BDCA-1+ dendritic cells,BDCA-3+ dendritic cells,Cardiomyocytes,Central memory cytotoxic T cells,Crypt,Dendritic cells not otherwise specified,Dermis,Effector memory cytotoxic T cells,Effector memory RA+ cytotoxic T cells,Endothelial cells not otherwise specified,Epidermis,Fibroblasts,Granulocytes not otherwise specified,Granulosa…
hsa-miR-1183	miR-1183 (miRNAs w/seed ACUGUAG)	TargetScan Human	High (predicted)	ZYG11A	zyg-11 family member A, cell cycle regulator	Cancer,Dermatological Diseases and Conditions,Developmental Disorder,Endocrine System Disorders,Hereditary Disorder,Metabolic Disease,Neurological Disease,Organismal Injury and Abnormalities,Reproductive System Disease	Other	other		Human,Mouse,Rat	B lymphocytes not otherwise specified,Cardiomyocytes,Dendritic cells not otherwise specified,Dermis,Endothelial cells not otherwise specified,Epidermis,Fibroblasts,Granulosa cells,Heart,Hepatocytes,Keratinocytes,Kidney,Liver,Mammary Gland,Other Cells,Other Epithelial cells,Other Nervous System,Other Neurons,Other Organ Systems,Ovary,Placenta,Plasma cells,Prostate Gland,Retina,Skeletal Muscle,Skin…
hsa-miR-1200	miR-1200 (miRNAs w/seed UCCUGAG)	TargetScan Human	High (predicted)	ABHD14B	abhydrolase domain containing 14B	Cancer,Gastrointestinal Disease,Neurological Disease,Organismal Injury and Abnormalities,Reproductive System Disease	Cytoplasm	enzyme		Human,Mouse,Rat	Activated helper T cells,Adipocytes,Adipose,Amygdala,Astrocytes,B lymphocytes not otherwise specified,BDCA-1+ dendritic cells,BDCA-3+ dendritic cells,Bladder,Cardiomyocytes,Central memory cytotoxic T cells,Cerebellum,Cerebral Cortex,Crypt,Dendritic cells not otherwise specified,Dermis,Dorsal Root Ganglion,Effector memory cytotoxic T cells,Effector memory RA+ cytotoxic T cells,Effector T cells,End…
hsa-miR-1200	miR-1200 (miRNAs w/seed UCCUGAG)	TargetScan Human	High (predicted)	ABRACL	ABRA C-terminal like		Other	other		Human,Mouse,Rat	Activated helper T cells,Adipocytes,Adipose,Astrocytes,B lymphocytes not otherwise specified,BDCA-1+ dendritic cells,BDCA-3+ dendritic cells,Bladder,Cardiomyocytes,Central memory cytotoxic T cells,Crypt,Cytotoxic T cells,Dendritic cells not otherwise specified,Dermis,Effector memory cytotoxic T cells,Effector memory RA+ cytotoxic T cells,Effector T cells,Endothelial cells not otherwise specified,…
hsa-miR-1200	miR-1200 (miRNAs w/seed UCCUGAG)	TargetScan Human	High (predicted)	ACP2	acid phosphatase 2, lysosomal	Cancer,Connective Tissue Disorders,Dermatological Diseases and Conditions,Developmental Disorder,Endocrine System Disorders,Gastrointestinal Disease,Hematological Disease,Hereditary Disorder,Immunological Disease,Inflammatory Response,Metabolic Disease,Neurological Disease,Organismal Injury and Abnormalities,Reproductive System Disease,Skeletal and Muscular Disorders	Cytoplasm	phosphatase	NAD Phosphorylation and Dephosphorylation,NAD Salvage Pathway II	Human,Mouse,Rat	Activated helper T cells,Activated Vd1 Gamma-delta T cells,Activated Vd2 Gamma-delta T cells,Adipocytes,Adipose,Amygdala,Astrocytes,B lymphocytes not otherwise specified,BDCA-1+ dendritic cells,BDCA-3+ dendritic cells,Cardiomyocytes,Central memory cytotoxic T cells,Central memory helper T cells,Cerebellum,Cerebral Cortex,Crypt,Cytotoxic T cells,Dendritic cells not otherwise specified,Dermis,Dorsa…
hsa-miR-1200	miR-1200 (miRNAs w/seed UCCUGAG)	TargetScan Human	High (predicted)	ACTL6A	actin like 6A	Cancer,Cardiovascular Disease,Connective Tissue Disorders,Dermatological Diseases and Conditions,Developmental Disorder,Hematological Disease,Immunological Disease,Inflammatory Disease,Inflammatory Response,Organismal Injury and Abnormalities,Respiratory Disease,Skeletal and Muscular Disorders	Nucleus	other		Human,Mouse,Rat	Adipocytes,Adipose,Astrocytes,B lymphocytes not otherwise specified,Bladder,Brain,Cardiomyocytes,Crypt,Cytotoxic T cells,Dendritic cells not otherwise specified,Dermis,Dorsal Root Ganglion,Effector T cells,Endothelial cells not otherwise specified,Epidermis,Epithelial cells not otherwise specified,Fibroblasts,Granulocytes not otherwise specified,Granulosa cells,Heart,Hematopoietic progenitor cell…
hsa-miR-1200	miR-1200 (miRNAs w/seed UCCUGAG)	TargetScan Human	High (predicted)	ALS2	alsin Rho guanine nucleotide exchange factor ALS2	Cancer,Connective Tissue Disorders,Dermatological Diseases and Conditions,Developmental Disorder,Endocrine System Disorders,Gastrointestinal Disease,Hepatic System Disease,Hereditary Disorder,Inflammatory Response,Neurological Disease,Organismal Injury and Abnormalities,Psychological Disorders,Reproductive System Disease,Respiratory Disease,Skeletal and Muscular Disorders	Cytoplasm	other	Amyotrophic Lateral Sclerosis Signaling	Human,Mouse,Rat	Adipocytes,Adipose,Astrocytes,B lymphocytes not otherwise specified,BDCA-1+ dendritic cells,BDCA-3+ dendritic cells,Brain,Cardiomyocytes,Cerebellum,Cerebral Cortex,Crypt,Dendritic cells not otherwise specified,Dermis,Effector memory cytotoxic T cells,Effector memory RA+ cytotoxic T cells,Endothelial cells not otherwise specified,Epidermis,Fibroblasts,Granulocytes not otherwise specified,Granulosa…
hsa-miR-1200	miR-1200 (miRNAs w/seed UCCUGAG)	TargetScan Human	High (predicted)	AMMECR1L	AMMECR1 like	Cancer,Dermatological Diseases and Conditions,Endocrine System Disorders,Gastrointestinal Disease,Neurological Disease,Organismal Injury and Abnormalities	Other	other		Human,Mouse,Rat	Activated helper T cells,Adipocytes,Adipose,Astrocytes,B lymphocytes not otherwise specified,BDCA-1+ dendritic cells,BDCA-3+ dendritic cells,Bladder,Cardiomyocytes,Central memory cytotoxic T cells,Cerebellum,Crypt,Cytotoxic T cells,Dendritic cells not otherwise specified,Dermis,Dorsal Root Ganglion,Effector memory cytotoxic T cells,Effector memory RA+ cytotoxic T cells,Effector T cells,Endothelia…
hsa-miR-1200	miR-1200 (miRNAs w/seed UCCUGAG)	TargetScan Human	High (predicted)	APTX	aprataxin	Cancer,Cardiovascular Disease,Endocrine System Disorders,Gastrointestinal Disease,Hereditary Disorder,Metabolic Disease,Neurological Disease,Ophthalmic Disease,Organismal Injury and Abnormalities,Reproductive System Disease	Nucleus	phosphatase		Human,Mouse,Rat	Activated CD56bright NK cells,Activated CD56dim NK cells,Activated helper T cells,Activated Vd1 Gamma-delta T cells,Activated Vd2 Gamma-delta T cells,Adipocytes,Adipose,Amygdala,Astrocytes,B lymphocytes not otherwise specified,BDCA-1+ dendritic cells,BDCA-3+ dendritic cells,Brain,Brainstem,Cardiomyocytes,Caudate Nucleus,CD56bright NK cells,CD56dim NK cells,Central memory cytotoxic T cells,Central…
hsa-miR-1200	miR-1200 (miRNAs w/seed UCCUGAG)	TargetScan Human	High (predicted)	ARHGEF39	Rho guanine nucleotide exchange factor 39	Cancer,Endocrine System Disorders,Organismal Injury and Abnormalities,Respiratory Disease	Plasma Membrane	other	Reelin Signaling in Neurons,Thrombin Signaling	Human,Mouse,Rat	Adipocytes,Adipose,B lymphocytes not otherwise specified,Cardiomyocytes,Crypt,Dendritic cells not otherwise specified,Dermis,Endothelial cells not otherwise specified,Epidermis,Fibroblasts,Granulosa cells,Heart,Hematopoietic progenitor cells,Hepatocytes,Keratinocytes,Kidney,Langerhans cells,Liver,Macrophages not otherwise specified,Mammary Gland,Mature monocyte-derived dendritic cells,Melanocytes…
hsa-miR-1200	miR-1200 (miRNAs w/seed UCCUGAG)	TargetScan Human	High (predicted)	ARL15	ADP ribosylation factor like GTPase 15	Cancer,Endocrine System Disorders,Gastrointestinal Disease,Organismal Injury and Abnormalities,Reproductive System Disease	Cytoplasm	other		Human,Mouse,Rat	Adipocytes,Adipose,Amygdala,Astrocytes,B lymphocytes not otherwise specified,Bladder,Brain,Cardiomyocytes,Cerebellum,Cerebral Cortex,Crypt,Cytotoxic T cells,Dendritic cells not otherwise specified,Dermis,Dorsal Root Ganglion,Effector T cells,Endothelial cells not otherwise specified,Epidermis,Fibroblasts,Granulocytes not otherwise specified,Granulosa cells,Heart,Hematopoietic progenitor cells,Hep…
hsa-miR-1200	miR-1200 (miRNAs w/seed UCCUGAG)	TargetScan Human	High (predicted)	ATG2B	autophagy related 2B	Cancer,Dermatological Diseases and Conditions,Endocrine System Disorders,Gastrointestinal Disease,Hematological Disease,Hepatic System Disease,Hereditary Disorder,Immunological Disease,Inflammatory Response,Neurological Disease,Organismal Injury and Abnormalities,Reproductive System Disease	Cytoplasm	transporter	Autophagy,Sirtuin Signaling Pathway	Human,Mouse	Activated helper T cells,Adipocytes,Adipose,Amygdala,Astrocytes,B lymphocytes not otherwise specified,BDCA-1+ dendritic cells,BDCA-3+ dendritic cells,Cardiomyocytes,Central memory cytotoxic T cells,Cerebral Cortex,Crypt,Cytotoxic T cells,Dendritic cells not otherwise specified,Dermis,Dorsal Root Ganglion,Effector memory cytotoxic T cells,Effector memory RA+ cytotoxic T cells,Effector T cells,Endo…
hsa-miR-1200	miR-1200 (miRNAs w/seed UCCUGAG)	TargetScan Human	High (predicted)	B3GALT5	beta-1,3-galactosyltransferase 5	Cancer,Dermatological Diseases and Conditions,Neurological Disease,Organismal Injury and Abnormalities,Reproductive System Disease	Cytoplasm	enzyme		Human,Mouse,Rat	Adipocytes,Adipose,Adrenal Gland,Amygdala,Astrocytes,B lymphocytes not otherwise specified,Brain,Cardiomyocytes,Cerebellum,Cerebral Cortex,Crypt,Cytotoxic T cells,Dendritic cells not otherwise specified,Dorsal Root Ganglion,Effector T cells,Endothelial cells not otherwise specified,Fibroblasts,Granulocytes not otherwise specified,Granulosa cells,Heart,Hippocampus,Hypothalamus,Kidney,Large Intesti…
hsa-miR-1200	miR-1200 (miRNAs w/seed UCCUGAG)	TargetScan Human	High (predicted)	BCL11B	BAF chromatin remodeling complex subunit BCL11B	Cancer,Connective Tissue Disorders,Dental Disease,Dermatological Diseases and Conditions,Developmental Disorder,Endocrine System Disorders,Gastrointestinal Disease,Hematological Disease,Hereditary Disorder,Immunological Disease,Inflammatory Disease,Inflammatory Response,Metabolic Disease,Neurological Disease,Nutritional Disease,Ophthalmic Disease,Organismal Injury and Abnormalities,Psychological …	Nucleus	transcription regulator		Human,Mouse,Rat	Adipocytes,Adipose,Amygdala,Astrocytes,B lymphocytes not otherwise specified,Brain,Cardiomyocytes,Cells not otherwise specified,Cerebral Cortex,Cortical neurons,Crypt,Cytotoxic T cells,Dendritic cells not otherwise specified,Dermis,Effector T cells,Endothelial cells not otherwise specified,Epidermis,Fibroblasts,Granulocytes not otherwise specified,Granulosa cells,Heart,Hematopoietic progenitor ce…
hsa-miR-1200	miR-1200 (miRNAs w/seed UCCUGAG)	TargetScan Human	High (predicted)	BDP1	B double prime 1, subunit of RNA polymerase III transcription initiation factor IIIB	Auditory Disease,Cancer,Dermatological Diseases and Conditions,Endocrine System Disorders,Gastrointestinal Disease,Hematological Disease,Hepatic System Disease,Hereditary Disorder,Immunological Disease,Neurological Disease,Organismal Injury and Abnormalities,Renal and Urological Disease,Reproductive System Disease,Respiratory Disease	Nucleus	transcription regulator	Assembly of RNA Polymerase III Complex	Human,Mouse	Activated helper T cells,Adipocytes,Adipose,Amygdala,Astrocytes,B lymphocytes not otherwise specified,BDCA-1+ dendritic cells,BDCA-3+ dendritic cells,Bladder,Brain,Cardiomyocytes,Central memory cytotoxic T cells,Cerebellum,Cerebral Cortex,Crypt,Cytotoxic T cells,Dendritic cells not otherwise specified,Dermis,Dorsal Root Ganglion,Effector memory cytotoxic T cells,Effector memory RA+ cytotoxic T ce…
hsa-miR-1200	miR-1200 (miRNAs w/seed UCCUGAG)	TargetScan Human	High (predicted)	BMP2	bone morphogenetic protein 2	Cancer,Cardiovascular Disease,Connective Tissue Disorders,Dermatological Diseases and Conditions,Developmental Disorder,Endocrine System Disorders,Gastrointestinal Disease,Hematological Disease,Hepatic System Disease,Hereditary Disorder,Infectious Disease,Inflammatory Disease,Inflammatory Response,Metabolic Disease,Neurological Disease,Nutritional Disease,Organismal Injury and Abnormalities,Renal…	Extracellular Space	growth factor	Adipogenesis pathway,Axonal Guidance Signaling,Basal Cell Carcinoma Signaling,BMP signaling pathway,Cardiomyocyte Differentiation via BMP Receptors,CDX Gastrointestinal Cancer Signaling Pathway,Factors Promoting Cardiogenesis in Vertebrates,Human Embryonic Stem Cell Pluripotency,ID1 Signaling Pathway,IL-10 Signaling,ILK Signaling,Iron homeostasis signaling pathway,Molecular Mechanisms of Cancer,M…	Human,Mouse,Rat	Activated CD56bright NK cells,Activated Vd1 Gamma-delta T cells,Adipocytes,Adipose,Adrenal Gland,Astrocytes,B lymphocytes not otherwise specified,Bladder,Bone marrow cells not otherwise specified,Bone marrow-derived macrophages,Brain,Calvaria,Cardiomyocytes,Cartilage Tissue,Cells not otherwise specified,Cerebral Ventricles,Chondrocytes,Choroid Plexus,Cornea,Crypt,Dendritic cells not otherwise spe…
hsa-miR-1200	miR-1200 (miRNAs w/seed UCCUGAG)	TargetScan Human	High (predicted)	BTC	betacellulin	Cancer,Cardiovascular Disease,Connective Tissue Disorders,Dermatological Diseases and Conditions,Endocrine System Disorders,Gastrointestinal Disease,Hematological Disease,Immunological Disease,Inflammatory Disease,Inflammatory Response,Metabolic Disease,Neurological Disease,Organismal Injury and Abnormalities,Skeletal and Muscular Disorders,Tumor Morphology	Extracellular Space	growth factor	ERBB Signaling,Neuregulin Signaling,S100 Family Signaling Pathway	Human,Mouse,Rat	Activated Vd1 Gamma-delta T cells,Activated Vd2 Gamma-delta T cells,Adipocytes,Adipose,Amygdala,B lymphocytes not otherwise specified,Bladder,Cardiomyocytes,Cerebellum,Cerebral Cortex,Crypt,Cytotoxic T cells,Dermis,Dorsal Root Ganglion,Effector T cells,Endothelial cells not otherwise specified,Epidermis,Fibroblasts,Granulosa cells,Heart,Hepatocytes,Hippocampus,Hypothalamus,Keratinocytes,Kidney,La…
hsa-miR-1200	miR-1200 (miRNAs w/seed UCCUGAG)	TargetScan Human	High (predicted)	C12orf43	chromosome 12 open reading frame 43	Cancer,Dermatological Diseases and Conditions,Gastrointestinal Disease,Hepatic System Disease,Organismal Injury and Abnormalities,Renal and Urological Disease,Reproductive System Disease	Other	other		Human,Mouse,Rat	Activated CD56bright NK cells,Activated helper T cells,Activated Vd1 Gamma-delta T cells,Activated Vd2 Gamma-delta T cells,Adipocytes,Adipose,Amygdala,Astrocytes,B lymphocytes not otherwise specified,BDCA-1+ dendritic cells,BDCA-3+ dendritic cells,Bladder,Cardiomyocytes,Central memory cytotoxic T cells,Central memory helper T cells,Cerebellum,Cerebral Cortex,Crypt,Cytotoxic T cells,Dendritic cell…
hsa-miR-1200	miR-1200 (miRNAs w/seed UCCUGAG)	TargetScan Human	High (predicted)	C15orf62	chromosome 15 open reading frame 62	Cancer,Dermatological Diseases and Conditions,Endocrine System Disorders,Organismal Injury and Abnormalities	Other	other		Human,Mouse,Rat	Adipocytes,Adipose,Astrocytes,B lymphocytes not otherwise specified,Cardiomyocytes,Crypt,Dendritic cells not otherwise specified,Dermis,Endothelial cells not otherwise specified,Epidermis,Fibroblasts,Granulosa cells,Heart,Hepatocytes,Keratinocytes,Kidney,Liver,Macrophages not otherwise specified,Mammary Gland,NK cells not otherwise specified,Other Cells,Other Epithelial cells,Other Nervous System…
hsa-miR-1200	miR-1200 (miRNAs w/seed UCCUGAG)	TargetScan Human	High (predicted)	C1orf147	chromosome 1 putative open reading frame 147		Other	other		Human
hsa-miR-1200	miR-1200 (miRNAs w/seed UCCUGAG)	TargetScan Human	High (predicted)	CASP12	caspase 12 (gene/pseudogene)	Cancer,Endocrine System Disorders,Gastrointestinal Disease,Hepatic System Disease,Infectious Disease,Neurological Disease,Organismal Injury and Abnormalities,Renal and Urological Disease,Reproductive System Disease	Cytoplasm	peptidase	Amyotrophic Lateral Sclerosis Signaling,Apoptosis Signaling,DNA damage-induced 14-3-3σ Signaling,Endocannabinoid Cancer Inhibition Pathway,Endoplasmic Reticulum Stress Pathway,Endothelin-1 Signaling,Huntington's Disease Signaling,IL-33 Signaling Pathway,Neutrophil Extracellular Trap Signaling Pathway,NOD1/2 Signaling Pathway,Osteoarthritis Pathway,Sphingosine-1-phosphate Signaling,Systemic Lupus …	Human	SK-MEL-28
hsa-miR-1200	miR-1200 (miRNAs w/seed UCCUGAG)	TargetScan Human	High (predicted)	CASP6	caspase 6	Cancer,Dermatological Diseases and Conditions,Developmental Disorder,Endocrine System Disorders,Gastrointestinal Disease,Hepatic System Disease,Hereditary Disorder,Immunological Disease,Inflammatory Disease,Metabolic Disease,Neurological Disease,Ophthalmic Disease,Organismal Injury and Abnormalities,Psychological Disorders,Reproductive System Disease,Skeletal and Muscular Disorders,Tumor Morpholo…	Cytoplasm	peptidase	Apoptosis Signaling,Cytotoxic T Lymphocyte-mediated Apoptosis of Target Cells,Death Receptor Signaling,DNA damage-induced 14-3-3σ Signaling,Endocannabinoid Cancer Inhibition Pathway,Endothelin-1 Signaling,HER-2 Signaling in Breast Cancer,Huntington's Disease Signaling,IL-33 Signaling Pathway,Molecular Mechanisms of Cancer,Neutrophil Extracellular Trap Signaling Pathway,Osteoarthritis Pathway,p53 …	Human,Mouse,Rat	Adipocytes,Adipose,Astrocytes,B lymphocytes not otherwise specified,Bladder,Brain,Cardiomyocytes,Cerebellum,Cerebral Cortex,Crypt,Cytotoxic T cells,Dendritic cells not otherwise specified,Dermis,Effector T cells,Endothelial cells not otherwise specified,Epidermis,Fibroblasts,Granulocytes not otherwise specified,Granulosa cells,Heart,Hematopoietic progenitor cells,Hepatocytes,Hippocampus,Hypothala…
hsa-miR-1200	miR-1200 (miRNAs w/seed UCCUGAG)	TargetScan Human	High (predicted)	CAV3	caveolin 3	Antimicrobial Response,Cancer,Cardiovascular Disease,Developmental Disorder,Endocrine System Disorders,Hematological Disease,Hereditary Disorder,Immunological Disease,Inflammatory Response,Neurological Disease,Organismal Injury and Abnormalities,Renal and Urological Disease,Skeletal and Muscular Disorders	Plasma Membrane	enzyme	G Beta Gamma Signaling,PDGF Signaling,Serotonin Receptor Signaling	Human,Mouse,Rat	Cardiomyocytes,Dermis,Endothelial cells not otherwise specified,Epidermis,Fibroblasts,Heart,Keratinocytes,Langerhans cells,Mammary Gland,Microglia,Other Cells,Other Organ Systems,Other Tissues and Primary Cells,Sertoli cells,Skeletal Muscle,Skin,Smooth Muscle,Smooth muscle cells not otherwise specified,Testis,HCC-2998,NIH/3T3 cells,Other Cell Line,Other Immune cell lines
hsa-miR-1200	miR-1200 (miRNAs w/seed UCCUGAG)	TargetScan Human	High (predicted)	CD300LD-AS1	CD300LD antisense RNA 1		Other	other		Human
hsa-miR-1200	miR-1200 (miRNAs w/seed UCCUGAG)	TargetScan Human	High (predicted)	CDCA7L	cell division cycle associated 7 like	Cancer,Dermatological Diseases and Conditions,Developmental Disorder,Endocrine System Disorders,Gastrointestinal Disease,Hematological Disease,Hepatic System Disease,Hereditary Disorder,Immunological Disease,Infectious Disease,Neurological Disease,Organismal Injury and Abnormalities,Renal and Urological Disease,Respiratory Disease	Nucleus	other		Human,Mouse,Rat	Adipocytes,Adipose,Astrocytes,B lymphocytes not otherwise specified,Cardiomyocytes,Crypt,Cytotoxic T cells,Dendritic cells not otherwise specified,Dermis,Effector T cells,Endothelial cells not otherwise specified,Epidermis,Fibroblasts,Granulocytes not otherwise specified,Granulosa cells,Heart,Hematopoietic progenitor cells,Hepatocytes,Keratinocytes,Kidney,Langerhans cells,Liver,Lung,Macrophages n…
hsa-miR-1200	miR-1200 (miRNAs w/seed UCCUGAG)	TargetScan Human	High (predicted)	CDH17	cadherin 17	Cancer,Cardiovascular Disease,Dermatological Diseases and Conditions,Endocrine System Disorders,Gastrointestinal Disease,Hepatic System Disease,Immunological Disease,Metabolic Disease,Neurological Disease,Organismal Injury and Abnormalities,Reproductive System Disease,Tumor Morphology	Plasma Membrane	transporter	CDX Gastrointestinal Cancer Signaling Pathway,Gα12/13 Signaling,RHOGDI Signaling,Signaling by Rho Family GTPases,Synaptogenesis Signaling Pathway	Human,Mouse,Rat	B lymphocytes not otherwise specified,Cardiomyocytes,Crypt,Dermis,Epidermis,Fibroblasts,Granulocytes not otherwise specified,Heart,Keratinocytes,Langerhans cells,Large Intestine,Lung,Macrophages not otherwise specified,Other Cells,Other Epithelial cells,Other Nervous System,Other Neurons,Other Organ Systems,Other Tissues and Primary Cells,Pancreas,Plasma cells,Skeletal Muscle,Skin,Small Intestine…
hsa-miR-1200	miR-1200 (miRNAs w/seed UCCUGAG)	TargetScan Human	High (predicted)	CDPF1	cysteine rich DPF motif domain containing 1	Cancer,Gastrointestinal Disease,Organismal Injury and Abnormalities	Extracellular Space	other		Human,Mouse	Activated helper T cells,Adipocytes,Adipose,Astrocytes,B lymphocytes not otherwise specified,BDCA-1+ dendritic cells,BDCA-3+ dendritic cells,Cardiomyocytes,Crypt,Cytotoxic T cells,Dendritic cells not otherwise specified,Dermis,Dorsal Root Ganglion,Effector T cells,Endothelial cells not otherwise specified,Epidermis,Fibroblasts,Granulocytes not otherwise specified,Granulosa cells,Heart,Hematopoiet…
hsa-miR-1200	miR-1200 (miRNAs w/seed UCCUGAG)	TargetScan Human	High (predicted)	CDX4	caudal type homeobox 4	Cancer,Cardiovascular Disease,Dermatological Diseases and Conditions,Developmental Disorder,Endocrine System Disorders,Gastrointestinal Disease,Hereditary Disorder,Neurological Disease,Organismal Injury and Abnormalities,Reproductive System Disease,Respiratory Disease,Skeletal and Muscular Disorders	Nucleus	transcription regulator	CDX Gastrointestinal Cancer Signaling Pathway	Human,Mouse,Rat	Cardiomyocytes,Dermis,Embryonic stem cells,Epidermis,Heart,Keratinocytes,Skin,Testis,Other Neuroblastoma Cell Lines
hsa-miR-1200	miR-1200 (miRNAs w/seed UCCUGAG)	TargetScan Human	High (predicted)	CFAP61	cilia and flagella associated protein 61	Cancer,Dermatological Diseases and Conditions,Endocrine System Disorders,Gastrointestinal Disease,Hepatic System Disease,Neurological Disease,Organismal Injury and Abnormalities,Renal and Urological Disease,Reproductive System Disease,Respiratory Disease	Cytoplasm	other		Human,Rat	Astrocytes,B lymphocytes not otherwise specified,Cardiomyocytes,Dendritic cells not otherwise specified,Endothelial cells not otherwise specified,Fibroblasts,Granulosa cells,Heart,Kidney,Lung,Macrophages not otherwise specified,Mammary Gland,Microglia,Other Cells,Other Epithelial cells,Other Nervous System,Other Neurons,Other Organ Systems,Ovary,Placenta,Prostate Gland,Retina,Skeletal Muscle,Smoo…
hsa-miR-1200	miR-1200 (miRNAs w/seed UCCUGAG)	TargetScan Human	High (predicted)	CIR1	corepressor interacting with RBPJ, CIR1	Cancer,Endocrine System Disorders,Gastrointestinal Disease,Hematological Disease,Hepatic System Disease,Immunological Disease,Infectious Disease,Neurological Disease,Organismal Injury and Abnormalities,Reproductive System Disease	Nucleus	transcription regulator		Human,Mouse,Rat	Activated CD56bright NK cells,Activated helper T cells,Activated Vd1 Gamma-delta T cells,Activated Vd2 Gamma-delta T cells,Adipocytes,Adipose,Amygdala,Astrocytes,B lymphocytes not otherwise specified,BDCA-1+ dendritic cells,BDCA-3+ dendritic cells,Cardiomyocytes,CD56bright NK cells,CD56dim NK cells,Central memory cytotoxic T cells,Central memory helper T cells,Cerebellum,Crypt,Cytotoxic T cells,D…
hsa-miR-1200	miR-1200 (miRNAs w/seed UCCUGAG)	TargetScan Human	High (predicted)	COCH	cochlin	Auditory Disease,Cancer,Connective Tissue Disorders,Dental Disease,Dermatological Diseases and Conditions,Developmental Disorder,Endocrine System Disorders,Gastrointestinal Disease,Hematological Disease,Hepatic System Disease,Hereditary Disorder,Immunological Disease,Infectious Disease,Inflammatory Disease,Inflammatory Response,Metabolic Disease,Neurological Disease,Ophthalmic Disease,Organismal …	Extracellular Space	other		Human,Mouse	Adipocytes,Adipose,Amygdala,Astrocytes,B lymphocytes not otherwise specified,BDCA-1+ dendritic cells,BDCA-3+ dendritic cells,Brain,Brainstem,Cardiomyocytes,Cerebral Cortex,Crypt,Dendritic cells not otherwise specified,Dermis,Endothelial cells not otherwise specified,Epidermis,Fibroblasts,Granulocytes not otherwise specified,Granulosa cells,Heart,Hematopoietic progenitor cells,Hepatocytes,Immature…
hsa-miR-1200	miR-1200 (miRNAs w/seed UCCUGAG)	TargetScan Human	High (predicted)	CRELD1	cysteine rich with EGF like domains 1	Cancer,Cardiovascular Disease,Dermatological Diseases and Conditions,Developmental Disorder,Endocrine System Disorders,Gastrointestinal Disease,Hepatic System Disease,Hereditary Disorder,Organismal Injury and Abnormalities,Renal and Urological Disease,Reproductive System Disease	Other	other		Human,Mouse,Rat	Activated helper T cells,Activated Vd1 Gamma-delta T cells,Activated Vd2 Gamma-delta T cells,Adipocytes,Adipose,Astrocytes,B lymphocytes not otherwise specified,BDCA-1+ dendritic cells,BDCA-3+ dendritic cells,Cardiomyocytes,Central memory helper T cells,Crypt,Cytotoxic T cells,Dendritic cells not otherwise specified,Dermis,Dorsal Root Ganglion,Effector memory helper T cells,Endothelial cells not …
hsa-miR-1200	miR-1200 (miRNAs w/seed UCCUGAG)	TargetScan Human	High (predicted),Moderate (predicted)	CTAGE9 (includes others)	CTAGE family member 4	Cancer,Dermatological Diseases and Conditions,Endocrine System Disorders,Gastrointestinal Disease,Hematological Disease,Hepatic System Disease,Immunological Disease,Organismal Injury and Abnormalities,Reproductive System Disease,Respiratory Disease	Other	other		Human	Adipocytes,Adipose,Astrocytes,Cardiomyocytes,Crypt,Dendritic cells not otherwise specified,Dermis,Endothelial cells not otherwise specified,Epidermis,Fibroblasts,Heart,Keratinocytes,Kidney,Langerhans cells,Lung,Macrophages not otherwise specified,Mammary Gland,Microglia,Monocytes not otherwise specified,Other Cells,Other Epithelial cells,Other Nervous System,Other Neurons,Other Organ Systems,Ovar…
hsa-miR-1200	miR-1200 (miRNAs w/seed UCCUGAG)	TargetScan Human	High (predicted)	CYB5R4	cytochrome b5 reductase 4	Cancer,Cardiovascular Disease,Dermatological Diseases and Conditions,Endocrine System Disorders,Gastrointestinal Disease,Hematological Disease,Hepatic System Disease,Inflammatory Response,Metabolic Disease,Neurological Disease,Organismal Injury and Abnormalities,Respiratory Disease	Cytoplasm	enzyme		Human,Mouse,Rat	Activated CD56bright NK cells,Activated helper T cells,Activated Vd1 Gamma-delta T cells,Activated Vd2 Gamma-delta T cells,Adipocytes,Adipose,Astrocytes,B lymphocytes not otherwise specified,BDCA-1+ dendritic cells,BDCA-3+ dendritic cells,Brain,Cardiomyocytes,CD56dim NK cells,Central memory cytotoxic T cells,Central memory helper T cells,Crypt,Cytotoxic T cells,Dendritic cells not otherwise speci…
hsa-miR-1200	miR-1200 (miRNAs w/seed UCCUGAG)	TargetScan Human	High (predicted)	CYP3A5	cytochrome P450 family 3 subfamily A member 5	Cancer,Cardiovascular Disease,Dermatological Diseases and Conditions,Endocrine System Disorders,Gastrointestinal Disease,Hematological Disease,Hepatic System Disease,Immunological Disease,Inflammatory Response,Neurological Disease,Organismal Injury and Abnormalities,Psychological Disorders,Renal and Urological Disease,Reproductive System Disease,Respiratory Disease	Cytoplasm	enzyme	Acetone Degradation I (to Methylglyoxal),Aryl Hydrocarbon Receptor Signaling,Bupropion Degradation,Estrogen Biosynthesis,Hepatic Cholestasis,LPS/IL-1 Mediated Inhibition of RXR Function,Melatonin Degradation I,Nicotine Degradation II,Nicotine Degradation III,NRF2-mediated Oxidative Stress Response,PXR/RXR Activation,Role of JAK2 in Hormone-like Cytokine Signaling,Superpathway of Melatonin Degrada…	Human,Mouse,Rat	Adipocytes,Adipose,Adrenal Gland,Amygdala,Astrocytes,B lymphocytes not otherwise specified,Bladder,Cardiomyocytes,CD56dim NK cells,Central memory cytotoxic T cells,Cerebellum,Cerebral Cortex,Crypt,Cytotoxic T cells,Dendritic cells not otherwise specified,Dermis,Dorsal Root Ganglion,Effector memory cytotoxic T cells,Effector memory RA+ cytotoxic T cells,Effector T cells,Endothelial cells not other…
hsa-miR-1200	miR-1200 (miRNAs w/seed UCCUGAG)	TargetScan Human	High (predicted)	DGKE	diacylglycerol kinase epsilon	Cancer,Cardiovascular Disease,Connective Tissue Disorders,Dermatological Diseases and Conditions,Endocrine System Disorders,Gastrointestinal Disease,Hematological Disease,Hepatic System Disease,Hereditary Disorder,Inflammatory Response,Neurological Disease,Organismal Injury and Abnormalities,Renal and Urological Disease,Reproductive System Disease	Cytoplasm	kinase		Human,Mouse	Activated Vd1 Gamma-delta T cells,Activated Vd2 Gamma-delta T cells,Adipocytes,Adipose,Amygdala,Astrocytes,B lymphocytes not otherwise specified,BDCA-1+ dendritic cells,Bladder,Brain,Brainstem,Cardiomyocytes,Central memory cytotoxic T cells,Central memory helper T cells,Cerebellum,Cerebral Cortex,Crypt,Cytotoxic T cells,Dendritic cells not otherwise specified,Dermis,Dorsal Root Ganglion,Effector …
hsa-miR-1200	miR-1200 (miRNAs w/seed UCCUGAG)	TargetScan Human	High (predicted)	DNAH10OS	dynein axonemal heavy chain 10 opposite strand	Cancer,Dermatological Diseases and Conditions,Endocrine System Disorders,Neurological Disease,Organismal Injury and Abnormalities	Other	other		Human	Cardiomyocytes,Heart,Kidney,Liver,Other Cells,Other Epithelial cells,Other Nervous System,Other Neurons,Pancreas,Retina,Testis
hsa-miR-1200	miR-1200 (miRNAs w/seed UCCUGAG)	TargetScan Human	High (predicted)	DNAJC5G	DnaJ heat shock protein family (Hsp40) member C5 gamma	Cancer,Dermatological Diseases and Conditions,Endocrine System Disorders,Hematological Disease,Immunological Disease,Organismal Injury and Abnormalities,Reproductive System Disease	Other	other	Aldosterone Signaling in Epithelial Cells,NRF2-mediated Oxidative Stress Response,Protein Ubiquitination Pathway,Unfolded protein response	Human,Mouse,Rat	Adipose,B lymphocytes not otherwise specified,Cardiomyocytes,Cytotoxic T cells,Effector T cells,Endothelial cells not otherwise specified,Fibroblasts,Heart,Langerhans cells,Macrophages not otherwise specified,Other Cells,Other Epithelial cells,Other Nervous System,Other Neurons,Other Organ Systems,Prostate Gland,Smooth Muscle,Smooth muscle cells not otherwise specified,Spleen,Stomach,Testis
hsa-miR-1200	miR-1200 (miRNAs w/seed UCCUGAG)	TargetScan Human	High (predicted)	DNASE2	deoxyribonuclease 2, lysosomal	Cancer,Cardiovascular Disease,Connective Tissue Disorders,Dermatological Diseases and Conditions,Developmental Disorder,Endocrine System Disorders,Gastrointestinal Disease,Hematological Disease,Hepatic System Disease,Hereditary Disorder,Immunological Disease,Inflammatory Disease,Inflammatory Response,Neurological Disease,Organismal Injury and Abnormalities,Renal and Urological Disease,Respiratory…	Cytoplasm	enzyme		Human,Mouse,Rat	Adipocytes,Adipose,Adrenal Gland,Astrocytes,B lymphocytes not otherwise specified,Bladder,Brain,Cardiomyocytes,Cerebellum,Crypt,Dendritic cells not otherwise specified,Dermis,Endothelial cells not otherwise specified,Epidermis,Fibroblasts,Granulocytes not otherwise specified,Granulosa cells,Heart,Hematopoietic progenitor cells,Hepatocytes,Immune cells not otherwise specified,Keratinocytes,Kidney,…
hsa-miR-1200	miR-1200 (miRNAs w/seed UCCUGAG)	TargetScan Human	High (predicted)	DOCK11	dedicator of cytokinesis 11	Cancer,Dermatological Diseases and Conditions,Endocrine System Disorders,Gastrointestinal Disease,Hematological Disease,Hepatic System Disease,Immunological Disease,Inflammatory Response,Neurological Disease,Organismal Injury and Abnormalities,Reproductive System Disease,Respiratory Disease	Cytoplasm	other		Human,Mouse,Rat	Activated helper T cells,Adipocytes,Adipose,Amygdala,Astrocytes,B lymphocytes not otherwise specified,BDCA-1+ dendritic cells,BDCA-3+ dendritic cells,Bladder,Cardiomyocytes,Central memory cytotoxic T cells,Cerebellum,Crypt,Cytotoxic T cells,Dendritic cells not otherwise specified,Dermis,Dorsal Root Ganglion,Effector memory cytotoxic T cells,Effector memory RA+ cytotoxic T cells,Effector T cells,E…
hsa-miR-1200	miR-1200 (miRNAs w/seed UCCUGAG)	TargetScan Human	High (predicted)	ENOSF1	enolase superfamily member 1	Cancer,Dermatological Diseases and Conditions,Endocrine System Disorders,Gastrointestinal Disease,Neurological Disease,Organismal Injury and Abnormalities,Reproductive System Disease	Other	enzyme		Human	Activated CD56bright NK cells,Activated CD56dim NK cells,Activated helper T cells,Activated Vd1 Gamma-delta T cells,Activated Vd2 Gamma-delta T cells,Adipocytes,Adipose,Astrocytes,B lymphocytes not otherwise specified,BDCA-1+ dendritic cells,BDCA-3+ dendritic cells,Cardiomyocytes,Central memory cytotoxic T cells,Central memory helper T cells,Crypt,Cytotoxic T cells,Dendritic cells not otherwise s…
hsa-miR-1200	miR-1200 (miRNAs w/seed UCCUGAG)	TargetScan Human	High (predicted)	EPB41	erythrocyte membrane protein band 4.1	Cancer,Cardiovascular Disease,Connective Tissue Disorders,Dermatological Diseases and Conditions,Endocrine System Disorders,Gastrointestinal Disease,Hematological Disease,Hereditary Disorder,Neurological Disease,Organismal Injury and Abnormalities,Psychological Disorders,Renal and Urological Disease,Respiratory Disease,Skeletal and Muscular Disorders	Plasma Membrane	other	Sertoli Cell-Sertoli Cell Junction Signaling,Tight Junction Signaling	Human,Mouse,Rat	Activated helper T cells,Adipocytes,Adipose,Astrocytes,B lymphocytes not otherwise specified,BDCA-1+ dendritic cells,BDCA-3+ dendritic cells,Bladder,Brain,Cardiomyocytes,Central memory cytotoxic T cells,Cerebellum,Cerebral Cortex,Crypt,Cytotoxic T cells,Dendritic cells not otherwise specified,Dermis,Dorsal Root Ganglion,Effector memory cytotoxic T cells,Effector memory RA+ cytotoxic T cells,Effec…
hsa-miR-1200	miR-1200 (miRNAs w/seed UCCUGAG)	TargetScan Human	High (predicted)	EPHX3	epoxide hydrolase 3	Cancer,Dermatological Diseases and Conditions,Endocrine System Disorders,Gastrointestinal Disease,Hepatic System Disease,Neurological Disease,Organismal Injury and Abnormalities,Respiratory Disease	Other	enzyme		Human,Mouse,Rat	Activated Vd2 Gamma-delta T cells,Adipocytes,Adipose,Amygdala,B lymphocytes not otherwise specified,Bladder,Cardiomyocytes,Cerebellum,Cerebral Cortex,Cytotoxic T cells,Dermis,Dorsal Root Ganglion,Effector T cells,Endothelial cells not otherwise specified,Epidermis,Fibroblasts,Granulosa cells,Heart,Hippocampus,Hypothalamus,Keratinocytes,Kidney,Langerhans cells,Large Intestine,Liver,Lung,Macrophage…
hsa-miR-1200	miR-1200 (miRNAs w/seed UCCUGAG)	TargetScan Human	High (predicted)	FAM169BP	protein FAM169B		Other	other		Human	Cardiomyocytes,Heart,Hepatocytes,Kidney,Liver,Other Cells,Other Epithelial cells,Pancreas,Testis
hsa-miR-1200	miR-1200 (miRNAs w/seed UCCUGAG)	TargetScan Human	High (predicted)	FBXO10	F-box protein 10	Cancer,Dermatological Diseases and Conditions,Endocrine System Disorders,Gastrointestinal Disease,Hematological Disease,Hepatic System Disease,Immunological Disease,Organismal Injury and Abnormalities,Reproductive System Disease	Cytoplasm	enzyme		Human,Mouse,Rat	Adipocytes,Adipose,Astrocytes,B lymphocytes not otherwise specified,Brain,Cardiomyocytes,Crypt,Dendritic cells not otherwise specified,Dermis,Endothelial cells not otherwise specified,Epidermis,Fibroblasts,Granulosa cells,Heart,Hematopoietic progenitor cells,Hepatocytes,Keratinocytes,Kidney,Liver,Lung,Macrophages not otherwise specified,Mammary Gland,Melanocytes,Microglia,Monocytes not otherwise …
hsa-miR-1200	miR-1200 (miRNAs w/seed UCCUGAG)	TargetScan Human	High (predicted)	FER	FER tyrosine kinase	Cancer,Cardiovascular Disease,Dermatological Diseases and Conditions,Endocrine System Disorders,Gastrointestinal Disease,Hematological Disease,Hepatic System Disease,Hypersensitivity Response,Immunological Disease,Inflammatory Response,Neurological Disease,Organismal Injury and Abnormalities,Renal and Urological Disease,Reproductive System Disease,Respiratory Disease,Tumor Morphology	Cytoplasm	kinase	Epithelial Adherens Junction Signaling,Germ Cell-Sertoli Cell Junction Signaling,IL-15 Production,Leukocyte Extravasation Signaling,Sperm Motility	Human,Mouse,Rat	Adipocytes,Adipose,Astrocytes,B lymphocytes not otherwise specified,Bladder,Brain,Cardiomyocytes,Crypt,Dendritic cells not otherwise specified,Dermis,Endothelial cells not otherwise specified,Epidermis,Esophagus,Fibroblasts,Granulocytes not otherwise specified,Granulosa cells,Heart,Hematopoietic progenitor cells,Hepatocytes,Keratinocytes,Kidney,Langerhans cells,Large Intestine,Liver,Lung,Macropha…
hsa-miR-1200	miR-1200 (miRNAs w/seed UCCUGAG)	TargetScan Human	High (predicted)	FUOM	fucose mutarotase	Cancer,Endocrine System Disorders,Gastrointestinal Disease,Organismal Injury and Abnormalities	Cytoplasm	enzyme		Human,Mouse,Rat	Activated helper T cells,Adipocytes,Adipose,B lymphocytes not otherwise specified,BDCA-1+ dendritic cells,BDCA-3+ dendritic cells,Cardiomyocytes,Central memory cytotoxic T cells,Crypt,Dendritic cells not otherwise specified,Dermis,Effector memory cytotoxic T cells,Effector memory RA+ cytotoxic T cells,Endothelial cells not otherwise specified,Epidermis,Fibroblasts,Granulocytes not otherwise speci…
hsa-miR-1200	miR-1200 (miRNAs w/seed UCCUGAG)	TargetScan Human	High (predicted)	GABRA4	gamma-aminobutyric acid type A receptor subunit alpha4	Auditory Disease,Cancer,Cardiovascular Disease,Connective Tissue Disorders,Dental Disease,Dermatological Diseases and Conditions,Developmental Disorder,Endocrine System Disorders,Gastrointestinal Disease,Hematological Disease,Hepatic System Disease,Hereditary Disorder,Immunological Disease,Infectious Disease,Inflammatory Disease,Inflammatory Response,Metabolic Disease,Neurological Disease,Nutriti…	Plasma Membrane	ion channel	GABA Receptor Signaling,Gustation Pathway,Neuroinflammation Signaling Pathway,Neurovascular Coupling Signaling Pathway	Human,Mouse,Rat	Astrocytes,Brain,Calvaria,Cardiomyocytes,CD56bright NK cells,Central memory helper T cells,Cerebral Cortex,Cortical neurons,Dermis,Endothelial cells not otherwise specified,Epidermis,Fibroblasts,Heart,Hippocampus,Keratinocytes,Kidney,Large Intestine,Macrophages not otherwise specified,Mammary Gland,Microglia,Osteoblasts,Other Cells,Other Epithelial cells,Other Nervous System,Other Neurons,Other O…
hsa-miR-1200	miR-1200 (miRNAs w/seed UCCUGAG)	TargetScan Human	High (predicted)	GDPD4	glycerophosphodiester phosphodiesterase domain containing 4	Cancer,Dermatological Diseases and Conditions,Endocrine System Disorders,Gastrointestinal Disease,Hepatic System Disease,Neurological Disease,Organismal Injury and Abnormalities,Reproductive System Disease,Respiratory Disease	Other	kinase		Human,Mouse,Rat	B lymphocytes not otherwise specified,Cardiomyocytes,Cytotoxic T cells,Effector T cells,Epidermis,Fibroblasts,Heart,Hepatocytes,Kidney,Liver,Lung,Macrophages not otherwise specified,Olfactory Bulb,Other Cells,Other Nervous System,Other Neurons,Ovary,Pituitary Gland,Placenta,Skeletal Muscle,Substantia Nigra,Testis
hsa-miR-1200	miR-1200 (miRNAs w/seed UCCUGAG)	TargetScan Human	High (predicted)	GLT8D1	glycosyltransferase 8 domain containing 1	Cancer,Dermatological Diseases and Conditions,Endocrine System Disorders,Gastrointestinal Disease,Hereditary Disorder,Neurological Disease,Organismal Injury and Abnormalities,Psychological Disorders	Cytoplasm	enzyme		Human,Mouse,Rat	Activated CD56bright NK cells,Activated CD56dim NK cells,Activated helper T cells,Activated Vd1 Gamma-delta T cells,Activated Vd2 Gamma-delta T cells,Adipocytes,Adipose,Amygdala,Astrocytes,B lymphocytes not otherwise specified,BDCA-1+ dendritic cells,BDCA-3+ dendritic cells,Bladder,Cardiomyocytes,Central memory cytotoxic T cells,Central memory helper T cells,Cerebellum,Cerebral Cortex,Crypt,Cytot…
hsa-miR-1200	miR-1200 (miRNAs w/seed UCCUGAG)	TargetScan Human	High (predicted)	GP2	glycoprotein 2	Cancer,Dermatological Diseases and Conditions,Endocrine System Disorders,Gastrointestinal Disease,Hepatic System Disease,Inflammatory Response,Organismal Injury and Abnormalities,Reproductive System Disease,Respiratory Disease,Skeletal and Muscular Disorders	Cytoplasm	other		Human,Mouse,Rat	B lymphocytes not otherwise specified,Cardiomyocytes,Central memory cytotoxic T cells,Crypt,Cytotoxic T cells,Dermis,Endothelial cells not otherwise specified,Fibroblasts,Heart,Hepatocytes,Keratinocytes,Kidney,Langerhans cells,Liver,Macrophages not otherwise specified,Mammary Gland,Monocytes not otherwise specified,Other Cells,Other Epithelial cells,Other Nervous System,Other Neurons,Other Organ …
hsa-miR-1200	miR-1200 (miRNAs w/seed UCCUGAG)	TargetScan Human	High (predicted)	GPR157	G protein-coupled receptor 157	Cancer,Endocrine System Disorders,Gastrointestinal Disease,Hematological Disease,Immunological Disease,Neurological Disease,Organismal Injury and Abnormalities	Plasma Membrane	G-protein coupled receptor	Breast Cancer Regulation by Stathmin1,CREB Signaling in Neurons,FAK Signaling,G-Protein Coupled Receptor Signaling,Phagosome Formation,S100 Family Signaling Pathway	Human,Mouse,Rat	Adipocytes,Adipose,B lymphocytes not otherwise specified,BDCA-1+ dendritic cells,BDCA-3+ dendritic cells,Brain,Cardiomyocytes,Crypt,Dendritic cells not otherwise specified,Dermis,Endothelial cells not otherwise specified,Epidermis,Fibroblasts,Granulosa cells,Heart,Hepatocytes,Immature monocyte-derived dendritic cells,Keratinocytes,Kidney,Langerhans cells,Liver,Lung,Macrophages not otherwise speci…
hsa-miR-1200	miR-1200 (miRNAs w/seed UCCUGAG)	TargetScan Human	High (predicted)	GRAMD1A	GRAM domain containing 1A	Cancer,Connective Tissue Disorders,Dermatological Diseases and Conditions,Endocrine System Disorders,Gastrointestinal Disease,Immunological Disease,Inflammatory Disease,Inflammatory Response,Organismal Injury and Abnormalities,Skeletal and Muscular Disorders	Cytoplasm	transporter		Human,Mouse,Rat	Activated helper T cells,Adipocytes,Adipose,Amygdala,Astrocytes,B lymphocytes not otherwise specified,BDCA-1+ dendritic cells,BDCA-3+ dendritic cells,Cardiomyocytes,Central memory cytotoxic T cells,Cerebellum,Cerebral Cortex,Crypt,Cytotoxic T cells,Dendritic cells not otherwise specified,Dermis,Dorsal Root Ganglion,Effector memory cytotoxic T cells,Effector memory RA+ cytotoxic T cells,Effector T…
hsa-miR-1200	miR-1200 (miRNAs w/seed UCCUGAG)	TargetScan Human	High (predicted)	H3-5	H3.5 histone	Cancer,Neurological Disease,Organismal Injury and Abnormalities,Reproductive System Disease,Respiratory Disease	Nucleus	other		Human,Mouse	Adipocytes,Adipose,B lymphocytes not otherwise specified,Cardiomyocytes,Dendritic cells not otherwise specified,Endothelial cells not otherwise specified,Fibroblasts,Heart,Other Cells,Other Epithelial cells,Placenta,Plasma cells,Smooth Muscle,Smooth muscle cells not otherwise specified,Thymus
hsa-miR-1200	miR-1200 (miRNAs w/seed UCCUGAG)	TargetScan Human	High (predicted)	H3C10	H3 clustered histone 10	Dermatological Diseases and Conditions,Immunological Disease,Inflammatory Disease,Inflammatory Response,Organismal Injury and Abnormalities	Nucleus	other		Human,Mouse	Activated Vd1 Gamma-delta T cells,Activated Vd2 Gamma-delta T cells,Adipocytes,Adipose,Cardiomyocytes,Dendritic cells not otherwise specified,Dorsal Root Ganglion,Endothelial cells not otherwise specified,Fibroblasts,Heart,Macrophages not otherwise specified,Mature monocyte-derived dendritic cells,Other Cells,Other Epithelial cells,Other Nervous System,Placenta,Plasma cells,Smooth Muscle,Smooth m…
hsa-miR-1200	miR-1200 (miRNAs w/seed UCCUGAG)	TargetScan Human	High (predicted)	HCK	HCK proto-oncogene, Src family tyrosine kinase	Antimicrobial Response,Cancer,Cardiovascular Disease,Connective Tissue Disorders,Dermatological Diseases and Conditions,Developmental Disorder,Endocrine System Disorders,Gastrointestinal Disease,Hematological Disease,Hepatic System Disease,Hereditary Disorder,Hypersensitivity Response,Immunological Disease,Infectious Disease,Inflammatory Disease,Inflammatory Response,Organismal Injury and Abnorma…	Cytoplasm	kinase	Chronic Myeloid Leukemia Signaling,Circadian Rhythm Signaling,CTLA4 Signaling in Cytotoxic T Lymphocytes,Fcγ Receptor-mediated Phagocytosis in Macrophages and Monocytes,GM-CSF Signaling,Gαs Signaling,HER-2 Signaling in Breast Cancer,ID1 Signaling Pathway,IL-13 Signaling Pathway,IL-15 Production,Insulin Secretion Signaling Pathway,Myelination Signaling Pathway,Neutrophil Extracellular Trap Signali…	Human,Mouse,Rat	Adipocytes,Adipose,Amygdala,B lymphocytes not otherwise specified,Bladder,Cardiomyocytes,Cerebellum,Cerebral Cortex,Cytotoxic T cells,Dendritic cells not otherwise specified,Dermis,Dorsal Root Ganglion,Effector T cells,Endothelial cells not otherwise specified,Epidermis,Fibroblasts,Granulocytes not otherwise specified,Granulosa cells,Heart,Hematopoietic progenitor cells,Hepatocytes,Hippocampus,Hy…
hsa-miR-1200	miR-1200 (miRNAs w/seed UCCUGAG)	TargetScan Human	High (predicted)	HEPH	hephaestin	Cancer,Cardiovascular Disease,Dermatological Diseases and Conditions,Developmental Disorder,Endocrine System Disorders,Gastrointestinal Disease,Hematological Disease,Hepatic System Disease,Hereditary Disorder,Metabolic Disease,Neurological Disease,Organismal Injury and Abnormalities,Renal and Urological Disease,Reproductive System Disease,Respiratory Disease,Skeletal and Muscular Disorders	Plasma Membrane	transporter	Iron homeostasis signaling pathway	Human,Mouse,Rat	Adipocytes,Adipose,Astrocytes,B lymphocytes not otherwise specified,Brain,Cardiomyocytes,Crypt,Dendritic cells not otherwise specified,Dermis,Endothelial cells not otherwise specified,Epidermis,Fibroblasts,Granulosa cells,Heart,Keratinocytes,Langerhans cells,Large Intestine,Liver,Lung,Macrophages not otherwise specified,Mammary Gland,Microglia,Microvascular endothelial cells,Other Cells,Other Epi…
hsa-miR-1200	miR-1200 (miRNAs w/seed UCCUGAG)	TargetScan Human	High (predicted)	HHAT	hedgehog acyltransferase	Cancer,Connective Tissue Disorders,Dermatological Diseases and Conditions,Developmental Disorder,Endocrine System Disorders,Gastrointestinal Disease,Hepatic System Disease,Hereditary Disorder,Neurological Disease,Organismal Injury and Abnormalities,Reproductive System Disease,Skeletal and Muscular Disorders	Cytoplasm	enzyme	Molecular Mechanisms of Cancer,Protein Kinase A Signaling	Human,Mouse,Rat	Adipocytes,Adipose,Astrocytes,B lymphocytes not otherwise specified,Cardiomyocytes,Crypt,Dendritic cells not otherwise specified,Dermis,Endothelial cells not otherwise specified,Epidermis,Fibroblasts,Granulosa cells,Heart,Hematopoietic progenitor cells,Hepatocytes,Keratinocytes,Kidney,Langerhans cells,Liver,Lung,Macrophages not otherwise specified,Mammary Gland,Microglia,Monocytes not otherwise s…
hsa-miR-1200	miR-1200 (miRNAs w/seed UCCUGAG)	TargetScan Human	High (predicted)	HMGA2-AS1	HMGA2 antisense RNA 1		Other	other		Human
hsa-miR-1200	miR-1200 (miRNAs w/seed UCCUGAG)	TargetScan Human	High (predicted)	HOXB2	homeobox B2	Auditory Disease,Cancer,Connective Tissue Disorders,Dermatological Diseases and Conditions,Developmental Disorder,Endocrine System Disorders,Gastrointestinal Disease,Hematological Disease,Immunological Disease,Inflammatory Disease,Neurological Disease,Ophthalmic Disease,Organismal Injury and Abnormalities,Reproductive System Disease,Respiratory Disease,Skeletal and Muscular Disorders	Nucleus	transcription regulator		Human,Mouse,Rat	Activated CD56bright NK cells,Activated CD56dim NK cells,Activated Vd1 Gamma-delta T cells,Activated Vd2 Gamma-delta T cells,Adipocytes,Adipose,B lymphocytes not otherwise specified,BDCA-1+ dendritic cells,Cardiomyocytes,Central memory helper T cells,Crypt,Dendritic cells not otherwise specified,Dermis,Dorsal Root Ganglion,Effector memory cytotoxic T cells,Effector memory helper T cells,Effector …
hsa-miR-1200	miR-1200 (miRNAs w/seed UCCUGAG)	TargetScan Human	High (predicted)	HSPA5	heat shock protein family A (Hsp70) member 5	Cancer,Cardiovascular Disease,Connective Tissue Disorders,Dermatological Diseases and Conditions,Developmental Disorder,Endocrine System Disorders,Gastrointestinal Disease,Hematological Disease,Hepatic System Disease,Hereditary Disorder,Immunological Disease,Infectious Disease,Inflammatory Disease,Inflammatory Response,Metabolic Disease,Neurological Disease,Nutritional Disease,Ophthalmic Disease,…	Cytoplasm	enzyme	Aldosterone Signaling in Epithelial Cells,BAG2 Signaling Pathway,Chaperone Mediated Autophagy Signaling Pathway,EIF2 Signaling,Endoplasmic Reticulum Stress Pathway,eNOS Signaling,Glucocorticoid Receptor Signaling,HIF1α Signaling,Huntington's Disease Signaling,Immunogenic Cell Death Signaling Pathway,Natural Killer Cell Signaling,NOD1/2 Signaling Pathway,Protein Ubiquitination Pathway,Role of PKR …	Human,Mouse,Rat	Activated CD56bright NK cells,Activated CD56dim NK cells,Activated helper T cells,Activated Vd1 Gamma-delta T cells,Activated Vd2 Gamma-delta T cells,Adipocytes,Adipose,Amygdala,Astrocytes,B lymphocytes not otherwise specified,BDCA-1+ dendritic cells,BDCA-3+ dendritic cells,Bladder,Brain,Calvaria,Cardiomyocytes,CD56bright NK cells,CD56dim NK cells,Central memory cytotoxic T cells,Central memory h…
hsa-miR-1200	miR-1200 (miRNAs w/seed UCCUGAG)	TargetScan Human	High (predicted)	HTR7	5-hydroxytryptamine receptor 7	Cancer,Cardiovascular Disease,Dermatological Diseases and Conditions,Developmental Disorder,Endocrine System Disorders,Gastrointestinal Disease,Hematological Disease,Hepatic System Disease,Hereditary Disorder,Inflammatory Disease,Inflammatory Response,Metabolic Disease,Neurological Disease,Nutritional Disease,Organismal Injury and Abnormalities,Psychological Disorders,Reproductive System Disease,…	Plasma Membrane	G-protein coupled receptor	Breast Cancer Regulation by Stathmin1,cAMP-mediated signaling,CREB Signaling in Neurons,FAK Signaling,G-Protein Coupled Receptor Signaling,Gαs Signaling,Phagosome Formation,S100 Family Signaling Pathway,Serotonin Receptor Signaling	Human,Mouse,Rat	Adipocytes,Adipose,Amygdala,Astrocytes,B lymphocytes not otherwise specified,Brain,Brainstem,Cardiomyocytes,Cerebellum,Cerebral Cortex,Dendritic cells not otherwise specified,Dermis,Dorsal Root Ganglion,Epidermis,Fibroblasts,Granulosa cells,Heart,Hematopoietic progenitor cells,Hippocampus,Hypothalamus,Keratinocytes,Kidney,Liver,Macrophages not otherwise specified,Mammary Gland,Medulla Oblongata,M…
hsa-miR-1200	miR-1200 (miRNAs w/seed UCCUGAG)	TargetScan Human	High (predicted)	IL25	interleukin 25	Antimicrobial Response,Cancer,Cardiovascular Disease,Connective Tissue Disorders,Dermatological Diseases and Conditions,Gastrointestinal Disease,Hematological Disease,Hepatic System Disease,Hypersensitivity Response,Immunological Disease,Infectious Disease,Inflammatory Disease,Inflammatory Response,Metabolic Disease,Neurological Disease,Nutritional Disease,Organismal Injury and Abnormalities,Resp…	Extracellular Space	cytokine	Airway Inflammation in Asthma,Airway Pathology in Chronic Obstructive Pulmonary Disease,Cardiac Hypertrophy Signaling (Enhanced),CDX Gastrointestinal Cancer Signaling Pathway,Erythropoietin Signaling Pathway,Hepatic Cholestasis,HMGB1 Signaling,IL-17 Signaling,Macrophage Classical Activation Signaling Pathway,Multiple Sclerosis Signaling Pathway,NOD1/2 Signaling Pathway,Pathogen Induced Cytokine S…	Human,Mouse,Rat	Adipose,Adrenal Gland,Astrocytes,Bone marrow cells not otherwise specified,Brain,Cardiomyocytes,Cerebellum,Dermis,Endothelial cells not otherwise specified,Eosinophils,Fibroblasts,Heart,Keratinocytes,Kidney,Large Intestine,Liver,Lung,Lymph node,Mammary Gland,Other Cells,Other Epithelial cells,Other Granulocytes,Other Nervous System,Other Organ Systems,Other Tissues and Primary Cells,Placenta,Pros…
hsa-miR-1200	miR-1200 (miRNAs w/seed UCCUGAG)	TargetScan Human	High (predicted)	KLF13	KLF transcription factor 13	Cancer,Cardiovascular Disease,Connective Tissue Disorders,Developmental Disorder,Endocrine System Disorders,Gastrointestinal Disease,Hepatic System Disease,Hereditary Disorder,Immunological Disease,Inflammatory Disease,Inflammatory Response,Neurological Disease,Organismal Injury and Abnormalities,Skeletal and Muscular Disorders	Nucleus	transcription regulator		Human,Mouse,Rat	Adipocytes,Adipose,Amygdala,Astrocytes,B lymphocytes not otherwise specified,Beta islet cells,Bladder,Bone marrow-derived macrophages,Cardiomyocytes,Cerebellum,Cerebral Cortex,Crypt,Cytotoxic T cells,Dendritic cells not otherwise specified,Dermis,Dorsal Root Ganglion,Effector T cells,Endothelial cells not otherwise specified,Epidermis,Fibroblasts,Granulocytes not otherwise specified,Granulosa cel…
hsa-miR-1200	miR-1200 (miRNAs w/seed UCCUGAG)	TargetScan Human	High (predicted)	KRTDAP	keratinocyte differentiation associated protein	Cancer,Dermatological Diseases and Conditions,Endocrine System Disorders,Gastrointestinal Disease,Organismal Injury and Abnormalities,Respiratory Disease	Extracellular Space	other		Human,Mouse	Adipocytes,Adipose,Bladder,Cardiomyocytes,Dermis,Endothelial cells not otherwise specified,Epidermis,Esophagus,Fibroblasts,Heart,Keratinocytes,Langerhans cells,Macrophages not otherwise specified,Mammary Gland,Melanocytes,NK cells not otherwise specified,Other Cells,Other Epithelial cells,Other Nervous System,Other Neurons,Other Organ Systems,Other Tissues and Primary Cells,Pancreas,Prostate Glan…
hsa-miR-1200	miR-1200 (miRNAs w/seed UCCUGAG)	TargetScan Human	High (predicted)	LAD1	ladinin 1	Cancer,Dermatological Diseases and Conditions,Endocrine System Disorders,Gastrointestinal Disease,Hematological Disease,Hepatic System Disease,Immunological Disease,Neurological Disease,Organismal Injury and Abnormalities,Reproductive System Disease,Respiratory Disease	Extracellular Space	other		Human,Mouse,Rat	Adipocytes,Adipose,B lymphocytes not otherwise specified,Bladder,Cardiomyocytes,Crypt,Dendritic cells not otherwise specified,Dermis,Endothelial cells not otherwise specified,Epidermis,Fibroblasts,Heart,Hepatocytes,Keratinocytes,Kidney,Langerhans cells,Large Intestine,Liver,Lung,Macrophages not otherwise specified,Mammary Gland,Mature monocyte-derived dendritic cells,Melanocytes,Monocytes not oth…
hsa-miR-1200	miR-1200 (miRNAs w/seed UCCUGAG)	TargetScan Human	High (predicted)	LEFTY1	left-right determination factor 1	Cancer,Cardiovascular Disease,Connective Tissue Disorders,Dermatological Diseases and Conditions,Developmental Disorder,Endocrine System Disorders,Gastrointestinal Disease,Hepatic System Disease,Hereditary Disorder,Infectious Disease,Metabolic Disease,Organismal Injury and Abnormalities,Reproductive System Disease,Respiratory Disease,Skeletal and Muscular Disorders	Extracellular Space	growth factor	Human Embryonic Stem Cell Pluripotency	Human,Mouse,Rat	Activated Vd1 Gamma-delta T cells,Adipocytes,Adipose,Adrenal Gland,Amygdala,Astrocytes,B lymphocytes not otherwise specified,Bladder,Cardiomyocytes,CD56bright NK cells,Central memory helper T cells,Cerebellum,Cerebral Cortex,Crypt,Dermis,Dorsal Root Ganglion,Effector memory helper T cells,Effector T cells,Endothelial cells not otherwise specified,Epidermis,Fibroblasts,Granulosa cells,Heart,Hepato…
hsa-miR-1200	miR-1200 (miRNAs w/seed UCCUGAG)	TargetScan Human	High (predicted)	LILRA6	leukocyte immunoglobulin like receptor A6	Cancer,Dermatological Diseases and Conditions,Endocrine System Disorders,Gastrointestinal Disease,Hematological Disease,Immunological Disease,Neurological Disease,Organismal Injury and Abnormalities,Reproductive System Disease,Respiratory Disease	Plasma Membrane	other	Systemic Lupus Erythematosus In B Cell Signaling Pathway	Human,Rat	Cardiomyocytes,Dermis,Endothelial cells not otherwise specified,Epidermis,Fibroblasts,Granulocytes not otherwise specified,Heart,Hematopoietic progenitor cells,Hepatocytes,Keratinocytes,Kidney,Langerhans cells,Liver,Lung,Macrophages not otherwise specified,Mammary Gland,Microglia,Monocytes not otherwise specified,NK cells not otherwise specified,Other Cells,Other Epithelial cells,Other Nervous Sy…
hsa-miR-1200	miR-1200 (miRNAs w/seed UCCUGAG)	TargetScan Human	High (predicted)	LIN28A	lin-28 homolog A	Cancer,Cardiovascular Disease,Dermatological Diseases and Conditions,Developmental Disorder,Endocrine System Disorders,Gastrointestinal Disease,Hepatic System Disease,Neurological Disease,Organismal Injury and Abnormalities,Renal and Urological Disease,Reproductive System Disease,Respiratory Disease	Cytoplasm	other	MicroRNA Biogenesis Signaling Pathway,Polyamine Regulation in Colon Cancer	Human,Mouse,Rat	Amygdala,B lymphocytes not otherwise specified,Bladder,Cardiomyocytes,Cytotoxic T cells,Dermis,Effector T cells,Embryonic stem cells,Endothelial cells not otherwise specified,Epidermis,Fibroblasts,Granulosa cells,Heart,Hippocampus,Keratinocytes,Kidney,Large Intestine,Liver,Macrophages not otherwise specified,Mammary Gland,Other Cells,Other Epithelial cells,Other Nervous System,Other Neurons,Other…
hsa-miR-1200	miR-1200 (miRNAs w/seed UCCUGAG)	TargetScan Human	High (predicted)	LINC01118	long intergenic non-protein coding RNA 1118		Other	other		Human
hsa-miR-1200	miR-1200 (miRNAs w/seed UCCUGAG)	TargetScan Human	High (predicted)	LINC02906	long intergenic non-protein coding RNA 2906		Other	other		Human
hsa-miR-1200	miR-1200 (miRNAs w/seed UCCUGAG)	TargetScan Human	High (predicted)	LOC102723701	uncharacterized LOC102723701		Other	other		Human
hsa-miR-1200	miR-1200 (miRNAs w/seed UCCUGAG)	TargetScan Human	High (predicted)	LOC150935	uncharacterized LOC150935		Other	other		Human
hsa-miR-1200	miR-1200 (miRNAs w/seed UCCUGAG)	TargetScan Human	High (predicted)	LOXL4	lysyl oxidase like 4	Cancer,Dermatological Diseases and Conditions,Endocrine System Disorders,Neurological Disease,Organismal Injury and Abnormalities,Renal and Urological Disease,Reproductive System Disease	Extracellular Space	enzyme		Human,Mouse,Rat	Adipocytes,Adipose,Astrocytes,B lymphocytes not otherwise specified,Cardiomyocytes,Cartilage Tissue,Central memory cytotoxic T cells,Dendritic cells not otherwise specified,Dermis,Effector memory cytotoxic T cells,Effector memory RA+ cytotoxic T cells,Endothelial cells not otherwise specified,Epidermis,Fibroblasts,Granulocytes not otherwise specified,Granulosa cells,Heart,Hepatocytes,Immature mon…
hsa-miR-1200	miR-1200 (miRNAs w/seed UCCUGAG)	TargetScan Human	High (predicted)	LY6E	lymphocyte antigen 6 family member E	Cancer,Cardiovascular Disease,Connective Tissue Disorders,Dermatological Diseases and Conditions,Developmental Disorder,Endocrine System Disorders,Gastrointestinal Disease,Hematological Disease,Hepatic System Disease,Hereditary Disorder,Immunological Disease,Infectious Disease,Inflammatory Disease,Inflammatory Response,Metabolic Disease,Neurological Disease,Organismal Injury and Abnormalities,Psy…	Plasma Membrane	other		Human,Mouse,Rat	Activated CD56bright NK cells,Activated CD56dim NK cells,Activated helper T cells,Activated Vd1 Gamma-delta T cells,Adipocytes,Adipose,Amygdala,Astrocytes,B lymphocytes not otherwise specified,BDCA-1+ dendritic cells,BDCA-3+ dendritic cells,Bladder,Cardiomyocytes,Cerebellum,Cerebral Cortex,Crypt,Cytotoxic T cells,Dendritic cells not otherwise specified,Dermis,Dorsal Root Ganglion,Effector T cells…
hsa-miR-1200	miR-1200 (miRNAs w/seed UCCUGAG)	TargetScan Human	High (predicted)	MARVELD1	MARVEL domain containing 1	Cancer,Endocrine System Disorders,Neurological Disease,Organismal Injury and Abnormalities,Reproductive System Disease	Other	other		Human,Mouse	Adipocytes,Adipose,Astrocytes,B lymphocytes not otherwise specified,BDCA-1+ dendritic cells,BDCA-3+ dendritic cells,Cardiomyocytes,Crypt,Dendritic cells not otherwise specified,Dermis,Endothelial cells not otherwise specified,Epidermis,Fibroblasts,Granulocytes not otherwise specified,Granulosa cells,Heart,Hematopoietic progenitor cells,Hepatocytes,Immature monocyte-derived dendritic cells,Keratin…
hsa-miR-1200	miR-1200 (miRNAs w/seed UCCUGAG)	TargetScan Human	High (predicted)	MCM8	minichromosome maintenance 8 homologous recombination repair factor	Cancer,Endocrine System Disorders,Gastrointestinal Disease,Hematological Disease,Hereditary Disorder,Immunological Disease,Neurological Disease,Organismal Injury and Abnormalities,Renal and Urological Disease,Reproductive System Disease,Respiratory Disease	Nucleus	enzyme	Cell Cycle Control of Chromosomal Replication	Human,Mouse,Rat	Adipocytes,Adipose,Amygdala,Astrocytes,B lymphocytes not otherwise specified,Cardiomyocytes,Cerebellum,Crypt,Cytotoxic T cells,Dendritic cells not otherwise specified,Dermis,Dorsal Root Ganglion,Effector T cells,Endothelial cells not otherwise specified,Epidermis,Fibroblasts,Granulocytes not otherwise specified,Granulosa cells,Heart,Hematopoietic progenitor cells,Hepatocytes,Hippocampus,Hypothala…
hsa-miR-1200	miR-1200 (miRNAs w/seed UCCUGAG)	TargetScan Human	High (predicted)	MEOX2	mesenchyme homeobox 2	Auditory Disease,Cancer,Connective Tissue Disorders,Dermatological Diseases and Conditions,Developmental Disorder,Endocrine System Disorders,Gastrointestinal Disease,Hematological Disease,Hereditary Disorder,Immunological Disease,Metabolic Disease,Neurological Disease,Organismal Injury and Abnormalities,Psychological Disorders,Reproductive System Disease,Skeletal and Muscular Disorders,Tumor Morp…	Nucleus	transcription regulator		Human,Mouse,Rat	Adipocytes,Adipose,Astrocytes,B lymphocytes not otherwise specified,Brain,Cardiomyocytes,Cartilage Tissue,Chondrocytes,Dendritic cells not otherwise specified,Dermis,Dorsal Root Ganglion,Embryonic stem cells,Endothelial cells not otherwise specified,Epidermis,Fibroblasts,Heart,Hepatocytes,HUVEC cells,Keratinocytes,Langerhans cells,Liver,Lung,Macrophages not otherwise specified,Mammary Gland,Melan…
hsa-miR-1200	miR-1200 (miRNAs w/seed UCCUGAG)	TargetScan Human	High (predicted)	MIA2	MIA SH3 domain ER export factor 2	Cancer,Dermatological Diseases and Conditions,Endocrine System Disorders,Gastrointestinal Disease,Hematological Disease,Hepatic System Disease,Immunological Disease,Metabolic Disease,Neurological Disease,Organismal Injury and Abnormalities,Renal and Urological Disease,Reproductive System Disease,Respiratory Disease	Cytoplasm	transmembrane receptor		Human,Rat	Adipocytes,Adipose,B lymphocytes not otherwise specified,Dendritic cells not otherwise specified,Effector memory cytotoxic T cells,Endothelial cells not otherwise specified,Fibroblasts,Granulosa cells,Hepatocytes,Kidney,Liver,Macrophages not otherwise specified,Mammary Gland,Memory B cells,Monocytes not otherwise specified,Naive B cells,NK cells not otherwise specified,Other Cells,Other Epithelia…
hsa-miR-1200	miR-1200 (miRNAs w/seed UCCUGAG)	TargetScan Human	High (predicted)	MICOS10	mitochondrial contact site and cristae organizing system subunit 10		Cytoplasm	other		Human,Mouse,Rat	Activated helper T cells,Adipocytes,Adipose,Amygdala,B lymphocytes not otherwise specified,BDCA-1+ dendritic cells,BDCA-3+ dendritic cells,Cardiomyocytes,Central memory cytotoxic T cells,Cerebral Cortex,Dendritic cells not otherwise specified,Dorsal Root Ganglion,Effector memory cytotoxic T cells,Effector memory RA+ cytotoxic T cells,Endothelial cells not otherwise specified,Fibroblasts,Heart,Hyp…
hsa-miR-1200	miR-1200 (miRNAs w/seed UCCUGAG)	TargetScan Human	High (predicted)	MORN5	MORN repeat containing 5	Cancer,Dermatological Diseases and Conditions,Gastrointestinal Disease,Organismal Injury and Abnormalities,Reproductive System Disease,Respiratory Disease	Other	other		Human,Mouse,Rat	Adipocytes,Adipose,Astrocytes,BDCA-1+ dendritic cells,Cardiomyocytes,Endothelial cells not otherwise specified,Fibroblasts,Granulosa cells,Heart,Immature monocyte-derived dendritic cells,Kidney,Lung,Macrophages not otherwise specified,Mammary Gland,Natural T-regulatory cells,Other Cells,Other Epithelial cells,Other Nervous System,Other Neurons,Other Organ Systems,Ovary,Pancreas,Placenta,Prostate …
hsa-miR-1200	miR-1200 (miRNAs w/seed UCCUGAG)	TargetScan Human	High (predicted)	MRPS35	mitochondrial ribosomal protein S35	Cancer,Gastrointestinal Disease,Hepatic System Disease,Organismal Injury and Abnormalities,Reproductive System Disease	Cytoplasm	other		Human,Mouse,Rat	Activated CD56bright NK cells,Activated CD56dim NK cells,Activated helper T cells,Activated Vd1 Gamma-delta T cells,Activated Vd2 Gamma-delta T cells,Adipocytes,Adipose,Astrocytes,B lymphocytes not otherwise specified,BDCA-1+ dendritic cells,BDCA-3+ dendritic cells,Cardiomyocytes,CD56bright NK cells,CD56dim NK cells,Central memory cytotoxic T cells,Central memory helper T cells,Crypt,Cytotoxic T …
hsa-miR-1200	miR-1200 (miRNAs w/seed UCCUGAG)	TargetScan Human	High (predicted)	MTERF1	mitochondrial transcription termination factor 1	Cancer,Gastrointestinal Disease,Organismal Injury and Abnormalities,Reproductive System Disease	Cytoplasm	transcription regulator		Human,Mouse	Activated Vd1 Gamma-delta T cells,Activated Vd2 Gamma-delta T cells,Adipocytes,Adipose,Astrocytes,B lymphocytes not otherwise specified,Bladder,Cardiomyocytes,Central memory helper T cells,Crypt,Cytotoxic T cells,Dendritic cells not otherwise specified,Dorsal Root Ganglion,Effector T cells,Endothelial cells not otherwise specified,Fibroblasts,Granulocytes not otherwise specified,Granulosa cells,H…
hsa-miR-1200	miR-1200 (miRNAs w/seed UCCUGAG)	TargetScan Human	High (predicted)	MTFP1	mitochondrial fission process 1	Cancer,Dermatological Diseases and Conditions,Endocrine System Disorders,Gastrointestinal Disease,Organismal Injury and Abnormalities	Cytoplasm	other		Human,Mouse,Rat	Adipocytes,Adipose,Amygdala,Astrocytes,B lymphocytes not otherwise specified,Brain,Cardiomyocytes,Crypt,Dendritic cells not otherwise specified,Dermis,Dorsal Root Ganglion,Endothelial cells not otherwise specified,Epidermis,Fibroblasts,Granulocytes not otherwise specified,Granulosa cells,Heart,Hematopoietic progenitor cells,Hepatocytes,Hippocampus,Hypothalamus,Keratinocytes,Kidney,Langerhans cell…
hsa-miR-1200	miR-1200 (miRNAs w/seed UCCUGAG)	TargetScan Human	High (predicted)	MYBPH	myosin binding protein H	Cancer,Dermatological Diseases and Conditions,Endocrine System Disorders,Gastrointestinal Disease,Hepatic System Disease,Neurological Disease,Organismal Injury and Abnormalities,Reproductive System Disease,Respiratory Disease	Cytoplasm	other		Human,Mouse,Rat	Astrocytes,Cardiomyocytes,Dorsal Root Ganglion,Epidermis,Fibroblasts,Heart,Kidney,Lung,Macrophages not otherwise specified,Mammary Gland,Microglia,Other Epithelial cells,Pancreas,Placenta,Prostate Gland,Skeletal Muscle,Smooth Muscle,Smooth muscle cells not otherwise specified,T lymphocytes not otherwise specified,Thymus,Uterus,SNB-75,THP-1
hsa-miR-1200	miR-1200 (miRNAs w/seed UCCUGAG)	TargetScan Human	High (predicted)	MYRFL	myelin regulatory factor like	Cancer,Endocrine System Disorders,Gastrointestinal Disease,Organismal Injury and Abnormalities	Other	other		Human,Mouse,Rat	Astrocytes,Cardiomyocytes,Crypt,Dermis,Epidermis,Fibroblasts,Granulosa cells,Heart,Hematopoietic progenitor cells,Keratinocytes,Kidney,Macrophages not otherwise specified,Mammary Gland,Microglia,Other Cells,Other Epithelial cells,Other Nervous System,Other Neurons,Other Organ Systems,Ovary,Pancreas,Placenta,Prostate Gland,Retina,Skeletal Muscle,Skin,Smooth Muscle,Smooth muscle cells not otherwise…
hsa-miR-1200	miR-1200 (miRNAs w/seed UCCUGAG)	TargetScan Human	High (predicted)	NAP1L6P	nucleosome assembly protein 1 like 6, pseudogene		Other	other		Human
hsa-miR-1200	miR-1200 (miRNAs w/seed UCCUGAG)	TargetScan Human	High (predicted)	NCR3LG1	natural killer cell cytotoxicity receptor 3 ligand 1	Cancer,Dermatological Diseases and Conditions,Gastrointestinal Disease,Hematological Disease,Hepatic System Disease,Immunological Disease,Infectious Disease,Inflammatory Disease,Inflammatory Response,Organismal Injury and Abnormalities,Renal and Urological Disease	Plasma Membrane	other		Human	Adipocytes,Adipose,Astrocytes,B lymphocytes not otherwise specified,Cardiomyocytes,Crypt,Dendritic cells not otherwise specified,Dermis,Endothelial cells not otherwise specified,Epidermis,Fibroblasts,Granulosa cells,Heart,Hematopoietic progenitor cells,Hepatocytes,Keratinocytes,Kidney,Langerhans cells,Liver,Lung,Macrophages not otherwise specified,Mammary Gland,Melanocytes,Microglia,Monocytes not…
hsa-miR-1200	miR-1200 (miRNAs w/seed UCCUGAG)	TargetScan Human	High (predicted)	NKAIN3	sodium/potassium transporting ATPase interacting 3	Cancer,Dermatological Diseases and Conditions,Endocrine System Disorders,Gastrointestinal Disease,Hepatic System Disease,Organismal Injury and Abnormalities,Reproductive System Disease	Other	other		Human,Mouse,Rat	Adipose,Amygdala,Astrocytes,B lymphocytes not otherwise specified,Cardiomyocytes,Cytotoxic T cells,Dermis,Dorsal Root Ganglion,Effector T cells,Fibroblasts,Granulosa cells,Heart,Keratinocytes,Kidney,Liver,Lung,Mammary Gland,Melanocytes,Microglia,Other Cells,Other Epithelial cells,Other Nervous System,Other Neurons,Ovary,Pancreas,Pituitary Gland,Placenta,Prostate Gland,Retina,Skeletal Muscle,Skin,…
hsa-miR-1200	miR-1200 (miRNAs w/seed UCCUGAG)	TargetScan Human	High (predicted)	NKAPL	NFKB activating protein like	Cancer,Dermatological Diseases and Conditions,Endocrine System Disorders,Gastrointestinal Disease,Hepatic System Disease,Immunological Disease,Metabolic Disease,Neurological Disease,Organismal Injury and Abnormalities,Renal and Urological Disease,Reproductive System Disease,Respiratory Disease	Other	other		Human,Mouse,Rat	Adipocytes,Adipose,Astrocytes,B lymphocytes not otherwise specified,Cardiomyocytes,Dendritic cells not otherwise specified,Dermis,Endothelial cells not otherwise specified,Epidermis,Fibroblasts,Granulosa cells,Heart,Hepatocytes,Keratinocytes,Kidney,Langerhans cells,Liver,Macrophages not otherwise specified,Mammary Gland,Melanocytes,Microglia,Monocytes not otherwise specified,NK cells not otherwis…
hsa-miR-1200	miR-1200 (miRNAs w/seed UCCUGAG)	TargetScan Human	High (predicted)	NLRC5	NLR family CARD domain containing 5	Cancer,Dermatological Diseases and Conditions,Endocrine System Disorders,Gastrointestinal Disease,Hepatic System Disease,Immunological Disease,Infectious Disease,Inflammatory Disease,Inflammatory Response,Neurological Disease,Organismal Injury and Abnormalities,Renal and Urological Disease,Reproductive System Disease,Respiratory Disease	Cytoplasm	transcription regulator	Antigen Presentation Pathway,Pathogen Induced Cytokine Storm Signaling Pathway,TREM1 Signaling	Human,Mouse	Activated helper T cells,Adipocytes,Adipose,Astrocytes,B lymphocytes not otherwise specified,BDCA-1+ dendritic cells,BDCA-3+ dendritic cells,Bone marrow-derived dendritic cells,Bone marrow-derived macrophages,Cardiomyocytes,Central memory cytotoxic T cells,Crypt,Dendritic cells not otherwise specified,Dermis,Effector memory cytotoxic T cells,Effector memory RA+ cytotoxic T cells,Endothelial cells…
hsa-miR-1200	miR-1200 (miRNAs w/seed UCCUGAG)	TargetScan Human	High (predicted)	NPC1	NPC intracellular cholesterol transporter 1	Cancer,Cardiovascular Disease,Dermatological Diseases and Conditions,Developmental Disorder,Endocrine System Disorders,Gastrointestinal Disease,Hematological Disease,Hepatic System Disease,Hereditary Disorder,Infectious Disease,Inflammatory Disease,Inflammatory Response,Metabolic Disease,Neurological Disease,Nutritional Disease,Organismal Injury and Abnormalities,Renal and Urological Disease,Repr…	Cytoplasm	transporter	Coronavirus Pathogenesis Pathway	Human,Mouse,Rat	Activated CD56bright NK cells,Activated CD56dim NK cells,Activated helper T cells,Activated Vd1 Gamma-delta T cells,Activated Vd2 Gamma-delta T cells,Adipocytes,Adipose,Adrenal Gland,Astrocytes,B lymphocytes not otherwise specified,BDCA-1+ dendritic cells,BDCA-3+ dendritic cells,Bladder,Brain,Cardiomyocytes,CD56dim NK cells,Central memory cytotoxic T cells,Central memory helper T cells,Cerebellum…
hsa-miR-1200	miR-1200 (miRNAs w/seed UCCUGAG)	TargetScan Human	High (predicted)	NXNL2	nucleoredoxin like 2	Cancer,Dermatological Diseases and Conditions,Gastrointestinal Disease,Infectious Disease,Neurological Disease,Organismal Injury and Abnormalities,Reproductive System Disease,Respiratory Disease	Other	transporter		Human,Mouse,Rat	Adipocytes,Adipose,Astrocytes,B lymphocytes not otherwise specified,BDCA-3+ dendritic cells,Cardiomyocytes,Cerebellum,Dermis,Dorsal Root Ganglion,Endothelial cells not otherwise specified,Epidermis,Fibroblasts,Granulosa cells,Heart,Hepatocytes,Keratinocytes,Kidney,Liver,Macrophages not otherwise specified,Mammary Gland,Other Cells,Other Epithelial cells,Other Nervous System,Other Neurons,Other Or…
hsa-miR-1200	miR-1200 (miRNAs w/seed UCCUGAG)	TargetScan Human	High (predicted)	OTUD3	OTU deubiquitinase 3	Cancer,Cardiovascular Disease,Dermatological Diseases and Conditions,Endocrine System Disorders,Gastrointestinal Disease,Hepatic System Disease,Infectious Disease,Neurological Disease,Organismal Injury and Abnormalities,Reproductive System Disease	Cytoplasm	peptidase		Human,Mouse,Rat	Activated CD56dim NK cells,Activated helper T cells,Activated Vd1 Gamma-delta T cells,Activated Vd2 Gamma-delta T cells,Adipocytes,Adipose,Amygdala,Astrocytes,B lymphocytes not otherwise specified,BDCA-1+ dendritic cells,BDCA-3+ dendritic cells,Bladder,Cardiomyocytes,Central memory cytotoxic T cells,Central memory helper T cells,Cerebellum,Cerebral Cortex,Crypt,Cytotoxic T cells,Dendritic cells n…
hsa-miR-1200	miR-1200 (miRNAs w/seed UCCUGAG)	TargetScan Human	High (predicted)	PALM2AKAP2	PALM2 and AKAP2 fusion	Cancer,Connective Tissue Disorders,Inflammatory Disease,Metabolic Disease,Neurological Disease,Ophthalmic Disease,Organismal Injury and Abnormalities,Psychological Disorders,Reproductive System Disease,Respiratory Disease	Plasma Membrane	other	cAMP-mediated signaling,Cardiac β-adrenergic Signaling,Protein Kinase A Signaling	Human	Activated helper T cells,Adipocytes,Adipose,BDCA-1+ dendritic cells,BDCA-3+ dendritic cells,Cardiomyocytes,Fibroblasts,Heart,Immature monocyte-derived dendritic cells,Mature monocyte-derived dendritic cells,Memory B cells,Monocyte-derived macrophage,Naive B cells,Naive helper T cells,Natural T-regulatory cells,Other Cells,Other Epithelial cells,Other Nervous System,Plasmacytoid dendritic cells,Sm…
hsa-miR-1200	miR-1200 (miRNAs w/seed UCCUGAG)	TargetScan Human	High (predicted)	PAQR4	progestin and adipoQ receptor family member 4	Cancer,Endocrine System Disorders,Gastrointestinal Disease,Hepatic System Disease,Neurological Disease,Organismal Injury and Abnormalities,Renal and Urological Disease,Reproductive System Disease	Other	other		Human,Mouse,Rat	Activated helper T cells,Adipocytes,Adipose,Amygdala,Astrocytes,B lymphocytes not otherwise specified,Cardiomyocytes,Cerebellum,Cerebral Cortex,Crypt,Dendritic cells not otherwise specified,Dermis,Dorsal Root Ganglion,Effector memory helper T cells,Endothelial cells not otherwise specified,Epidermis,Fibroblasts,Granulocytes not otherwise specified,Granulosa cells,Heart,Hematopoietic progenitor ce…
hsa-miR-1200	miR-1200 (miRNAs w/seed UCCUGAG)	TargetScan Human	High (predicted)	PCTP	phosphatidylcholine transfer protein	Cancer,Endocrine System Disorders,Gastrointestinal Disease,Hepatic System Disease,Hereditary Disorder,Infectious Disease,Neurological Disease,Organismal Injury and Abnormalities,Psychological Disorders,Skeletal and Muscular Disorders	Cytoplasm	transporter		Human,Mouse,Rat	Adipocytes,Adipose,Astrocytes,B lymphocytes not otherwise specified,Cardiomyocytes,Crypt,Dendritic cells not otherwise specified,Dermis,Endothelial cells not otherwise specified,Epidermis,Fibroblasts,Granulocytes not otherwise specified,Granulosa cells,Heart,Hematopoietic progenitor cells,Hepatocytes,Keratinocytes,Kidney,Langerhans cells,Liver,Lung,Macrophages not otherwise specified,Mammary Glan…
hsa-miR-1200	miR-1200 (miRNAs w/seed UCCUGAG)	TargetScan Human	High (predicted)	PELI1	pellino E3 ubiquitin protein ligase 1	Cancer,Dermatological Diseases and Conditions,Endocrine System Disorders,Gastrointestinal Disease,Hematological Disease,Hepatic System Disease,Immunological Disease,Infectious Disease,Inflammatory Disease,Inflammatory Response,Neurological Disease,Organismal Injury and Abnormalities,Reproductive System Disease	Cytoplasm	enzyme	Necroptosis Signaling Pathway,NF-κB Signaling	Human,Mouse,Rat	Activated CD56dim NK cells,Activated helper T cells,Activated Vd1 Gamma-delta T cells,Activated Vd2 Gamma-delta T cells,Adipocytes,Adipose,Amygdala,Astrocytes,B lymphocytes not otherwise specified,BDCA-1+ dendritic cells,BDCA-3+ dendritic cells,Bladder,Brain,Cardiomyocytes,CD56bright NK cells,CD56dim NK cells,Central memory cytotoxic T cells,Central memory helper T cells,Cerebellum,Cerebral Corte…
hsa-miR-1200	miR-1200 (miRNAs w/seed UCCUGAG)	TargetScan Human	High (predicted)	PEX10	peroxisomal biogenesis factor 10	Cancer,Dermatological Diseases and Conditions,Developmental Disorder,Endocrine System Disorders,Gastrointestinal Disease,Hereditary Disorder,Metabolic Disease,Neurological Disease,Organismal Injury and Abnormalities,Respiratory Disease,Skeletal and Muscular Disorders	Cytoplasm	enzyme		Human,Mouse,Rat	Adipocytes,Adipose,Amygdala,Astrocytes,B lymphocytes not otherwise specified,Bladder,Cardiomyocytes,Cerebellum,Cerebral Cortex,Crypt,Cytotoxic T cells,Dendritic cells not otherwise specified,Dermis,Dorsal Root Ganglion,Effector T cells,Endothelial cells not otherwise specified,Epidermis,Fibroblasts,Granulosa cells,Heart,Hematopoietic progenitor cells,Hepatocytes,Hippocampus,Hypothalamus,Keratinoc…
hsa-miR-1200	miR-1200 (miRNAs w/seed UCCUGAG)	TargetScan Human	High (predicted)	PEX6	peroxisomal biogenesis factor 6	Auditory Disease,Cancer,Dental Disease,Dermatological Diseases and Conditions,Developmental Disorder,Endocrine System Disorders,Gastrointestinal Disease,Hematological Disease,Hereditary Disorder,Immunological Disease,Metabolic Disease,Neurological Disease,Ophthalmic Disease,Organismal Injury and Abnormalities,Renal and Urological Disease,Reproductive System Disease,Skeletal and Muscular Disorders	Cytoplasm	enzyme		Human,Mouse,Rat	Activated CD56bright NK cells,Activated helper T cells,Activated Vd1 Gamma-delta T cells,Adipocytes,Adipose,Amygdala,Astrocytes,B lymphocytes not otherwise specified,BDCA-1+ dendritic cells,BDCA-3+ dendritic cells,Bladder,Brain,Cardiomyocytes,CD56bright NK cells,Central memory helper T cells,Cerebellum,Cerebral Cortex,Crypt,Cytotoxic T cells,Dendritic cells not otherwise specified,Dermis,Dorsal R…
hsa-miR-1200	miR-1200 (miRNAs w/seed UCCUGAG)	TargetScan Human	High (predicted)	PHLDA3	pleckstrin homology like domain family A member 3	Cancer,Endocrine System Disorders,Gastrointestinal Disease,Infectious Disease,Metabolic Disease,Organismal Injury and Abnormalities,Renal and Urological Disease,Reproductive System Disease	Plasma Membrane	other		Human,Mouse,Rat	Adipocytes,Adipose,Amygdala,Astrocytes,B lymphocytes not otherwise specified,Bladder,Cardiomyocytes,Crypt,Dendritic cells not otherwise specified,Dermis,Dorsal Root Ganglion,Endothelial cells not otherwise specified,Epidermis,Fibroblasts,Granulosa cells,Heart,Hematopoietic progenitor cells,Hepatocytes,Hypothalamus,Immature monocyte-derived dendritic cells,Keratinocytes,Kidney,Langerhans cells,Liv…
hsa-miR-1200	miR-1200 (miRNAs w/seed UCCUGAG)	TargetScan Human	High (predicted)	PLSCR1	phospholipid scramblase 1	Antimicrobial Response,Cancer,Cardiovascular Disease,Connective Tissue Disorders,Dermatological Diseases and Conditions,Developmental Disorder,Endocrine System Disorders,Gastrointestinal Disease,Hematological Disease,Hepatic System Disease,Hypersensitivity Response,Immunological Disease,Infectious Disease,Inflammatory Disease,Inflammatory Response,Metabolic Disease,Organismal Injury and Abnormali…	Plasma Membrane	enzyme		Human,Mouse,Rat	Adipocytes,Adipose,Astrocytes,B lymphocytes not otherwise specified,Cardiomyocytes,Crypt,Dendritic cells not otherwise specified,Dermis,Endothelial cells not otherwise specified,Epidermis,Fibroblasts,Granulocytes not otherwise specified,Granulosa cells,Heart,Hematopoietic progenitor cells,Hepatocytes,Keratinocytes,Kidney,Langerhans cells,Large Intestine,Liver,Lung,Macrophages not otherwise specif…
hsa-miR-1200	miR-1200 (miRNAs w/seed UCCUGAG)	TargetScan Human	High (predicted)	POC1B	POC1 centriolar protein B	Cancer,Dermatological Diseases and Conditions,Developmental Disorder,Endocrine System Disorders,Gastrointestinal Disease,Hepatic System Disease,Hereditary Disorder,Neurological Disease,Ophthalmic Disease,Organismal Injury and Abnormalities,Psychological Disorders,Renal and Urological Disease,Reproductive System Disease	Cytoplasm	other		Human,Mouse,Rat	Activated helper T cells,Adipocytes,Adipose,Astrocytes,B lymphocytes not otherwise specified,BDCA-1+ dendritic cells,BDCA-3+ dendritic cells,Cardiomyocytes,Central memory cytotoxic T cells,Crypt,Dendritic cells not otherwise specified,Dermis,Effector memory cytotoxic T cells,Effector memory RA+ cytotoxic T cells,Endothelial cells not otherwise specified,Epidermis,Fibroblasts,Granulocytes not othe…
hsa-miR-1200	miR-1200 (miRNAs w/seed UCCUGAG)	TargetScan Human	High (predicted)	POLE3	DNA polymerase epsilon 3, accessory subunit	Cancer,Cardiovascular Disease,Dermatological Diseases and Conditions,Endocrine System Disorders,Gastrointestinal Disease,Hematological Disease,Immunological Disease,Inflammatory Disease,Neurological Disease,Organismal Injury and Abnormalities,Renal and Urological Disease,Reproductive System Disease,Skeletal and Muscular Disorders	Nucleus	enzyme	NER (Nucleotide Excision Repair, Enhanced Pathway)	Human,Mouse,Rat	Activated CD56bright NK cells,Activated CD56dim NK cells,Activated helper T cells,Activated Vd1 Gamma-delta T cells,Activated Vd2 Gamma-delta T cells,Adipocytes,Adipose,Astrocytes,B lymphocytes not otherwise specified,BDCA-1+ dendritic cells,BDCA-3+ dendritic cells,Brain,Cardiomyocytes,CD56bright NK cells,CD56dim NK cells,Central memory cytotoxic T cells,Central memory helper T cells,Crypt,Cytoto…
hsa-miR-1200	miR-1200 (miRNAs w/seed UCCUGAG)	TargetScan Human	High (predicted)	POLR3G	RNA polymerase III subunit G	Cancer,Endocrine System Disorders,Gastrointestinal Disease,Inflammatory Response,Organismal Injury and Abnormalities,Renal and Urological Disease	Nucleus	enzyme		Human,Mouse,Rat	Activated CD56bright NK cells,Activated helper T cells,Activated Vd1 Gamma-delta T cells,Activated Vd2 Gamma-delta T cells,Adipocytes,Adipose,Amygdala,Astrocytes,B lymphocytes not otherwise specified,BDCA-3+ dendritic cells,Bladder,Cardiomyocytes,CD56bright NK cells,CD56dim NK cells,Central memory cytotoxic T cells,Cerebellum,Cerebral Cortex,Crypt,Cytotoxic T cells,Dendritic cells not otherwise s…
hsa-miR-1200	miR-1200 (miRNAs w/seed UCCUGAG)	TargetScan Human	High (predicted)	POMGNT1	protein O-linked mannose N-acetylglucosaminyltransferase 1 (beta 1,2-)	Cancer,Cardiovascular Disease,Developmental Disorder,Endocrine System Disorders,Gastrointestinal Disease,Hematological Disease,Hereditary Disorder,Immunological Disease,Metabolic Disease,Neurological Disease,Ophthalmic Disease,Organismal Injury and Abnormalities,Psychological Disorders,Reproductive System Disease,Skeletal and Muscular Disorders	Cytoplasm	enzyme		Human,Mouse,Rat	Activated CD56bright NK cells,Activated Vd1 Gamma-delta T cells,Activated Vd2 Gamma-delta T cells,Adipocytes,Adipose,Amygdala,Astrocytes,B lymphocytes not otherwise specified,BDCA-1+ dendritic cells,BDCA-3+ dendritic cells,Bladder,Cardiomyocytes,CD56bright NK cells,Central memory helper T cells,Cerebellum,Cerebral Cortex,Crypt,Dendritic cells not otherwise specified,Dermis,Dorsal Root Ganglion,Ef…
hsa-miR-1200	miR-1200 (miRNAs w/seed UCCUGAG)	TargetScan Human	High (predicted)	PSMG4	proteasome assembly chaperone 4	Cancer,Dermatological Diseases and Conditions,Endocrine System Disorders,Gastrointestinal Disease,Hepatic System Disease,Organismal Injury and Abnormalities,Reproductive System Disease	Other	transcription regulator		Human,Mouse,Rat	Adipocytes,Adipose,Astrocytes,B lymphocytes not otherwise specified,BDCA-1+ dendritic cells,BDCA-3+ dendritic cells,Cardiomyocytes,Central memory cytotoxic T cells,Crypt,Dendritic cells not otherwise specified,Dermis,Effector memory cytotoxic T cells,Effector T cells,Endothelial cells not otherwise specified,Epidermis,Fibroblasts,Granulocytes not otherwise specified,Granulosa cells,Heart,Hematopo…
hsa-miR-1200	miR-1200 (miRNAs w/seed UCCUGAG)	TargetScan Human	High (predicted)	PTBP3	polypyrimidine tract binding protein 3	Cancer,Dermatological Diseases and Conditions,Endocrine System Disorders,Gastrointestinal Disease,Hepatic System Disease,Immunological Disease,Neurological Disease,Organismal Injury and Abnormalities,Reproductive System Disease,Respiratory Disease	Nucleus	other		Human,Mouse,Rat	Activated CD56bright NK cells,Activated helper T cells,Activated Vd1 Gamma-delta T cells,Activated Vd2 Gamma-delta T cells,Adipocytes,Adipose,Astrocytes,B lymphocytes not otherwise specified,BDCA-1+ dendritic cells,BDCA-3+ dendritic cells,Bladder,Cardiomyocytes,CD56bright NK cells,CD56dim NK cells,Central memory cytotoxic T cells,Central memory helper T cells,Cerebellum,Crypt,Cytotoxic T cells,De…
hsa-miR-1200	miR-1200 (miRNAs w/seed UCCUGAG)	TargetScan Human	High (predicted)	RAB11FIP2	RAB11 family interacting protein 2	Cancer,Endocrine System Disorders,Gastrointestinal Disease,Inflammatory Response,Neurological Disease,Organismal Injury and Abnormalities,Reproductive System Disease	Cytoplasm	other	IL-8 Signaling	Human,Mouse,Rat	Adipocytes,Adipose,Astrocytes,B lymphocytes not otherwise specified,Cardiomyocytes,Crypt,Dendritic cells not otherwise specified,Dermis,Endothelial cells not otherwise specified,Epidermis,Fibroblasts,Granulocytes not otherwise specified,Granulosa cells,Heart,Hematopoietic progenitor cells,Hepatocytes,Keratinocytes,Kidney,Langerhans cells,Liver,Lung,Macrophages not otherwise specified,Mammary Glan…
hsa-miR-1200	miR-1200 (miRNAs w/seed UCCUGAG)	TargetScan Human	High (predicted)	RALB	RAS like proto-oncogene B	Cancer,Connective Tissue Disorders,Dermatological Diseases and Conditions,Developmental Disorder,Endocrine System Disorders,Gastrointestinal Disease,Hepatic System Disease,Immunological Disease,Infectious Disease,Inflammatory Disease,Inflammatory Response,Metabolic Disease,Neurological Disease,Organismal Injury and Abnormalities,Renal and Urological Disease,Reproductive System Disease,Respiratory…	Cytoplasm	enzyme	14-3-3-mediated Signaling,Actin Cytoskeleton Signaling,Actin Nucleation by ARP-WASP Complex,Acute Myeloid Leukemia Signaling,Acute Phase Response Signaling,Adrenomedullin signaling pathway,Agrin Interactions at Neuromuscular Junction,Angiopoietin Signaling,Antiproliferative Role of Somatostatin Receptor 2,Apelin Endothelial Signaling Pathway,Apoptosis Signaling,Autophagy,Axonal Guidance Signaling…	Human,Mouse,Rat	Activated CD56bright NK cells,Activated CD56dim NK cells,Activated helper T cells,Activated Vd1 Gamma-delta T cells,Activated Vd2 Gamma-delta T cells,Adipocytes,Adipose,Amygdala,Astrocytes,B lymphocytes not otherwise specified,BDCA-1+ dendritic cells,BDCA-3+ dendritic cells,Bladder,Cardiomyocytes,Central memory helper T cells,Cerebellum,Cerebral Cortex,Crypt,Cytotoxic T cells,Dendritic cells not …
hsa-miR-1200	miR-1200 (miRNAs w/seed UCCUGAG)	TargetScan Human	High (predicted)	RBM7	RNA binding motif protein 7	Cancer,Endocrine System Disorders,Hematological Disease,Hereditary Disorder,Immunological Disease,Infectious Disease,Inflammatory Disease,Organismal Injury and Abnormalities,Renal and Urological Disease,Respiratory Disease	Nucleus	other		Human,Mouse,Rat	Activated CD56bright NK cells,Activated helper T cells,Activated Vd1 Gamma-delta T cells,Activated Vd2 Gamma-delta T cells,Adipocytes,Adipose,Amygdala,Astrocytes,B lymphocytes not otherwise specified,BDCA-1+ dendritic cells,BDCA-3+ dendritic cells,Bladder,Cardiomyocytes,CD56bright NK cells,CD56dim NK cells,Central memory cytotoxic T cells,Central memory helper T cells,Cerebellum,Cerebral Cortex,C…
hsa-miR-1200	miR-1200 (miRNAs w/seed UCCUGAG)	TargetScan Human	High (predicted)	RCE1	Ras converting CAAX endopeptidase 1	Cancer,Cardiovascular Disease,Gastrointestinal Disease,Hepatic System Disease,Neurological Disease,Ophthalmic Disease,Organismal Injury and Abnormalities,Reproductive System Disease,Respiratory Disease,Skeletal and Muscular Disorders	Cytoplasm	peptidase		Human,Mouse,Rat	Adipocytes,Adipose,Astrocytes,B lymphocytes not otherwise specified,Brain,Cardiomyocytes,Crypt,Dendritic cells not otherwise specified,Dermis,Endothelial cells not otherwise specified,Epidermis,Fibroblasts,Granulocytes not otherwise specified,Granulosa cells,Heart,Hematopoietic progenitor cells,Hepatocytes,Keratinocytes,Kidney,Langerhans cells,Liver,Lung,Macrophages not otherwise specified,Mammar…
hsa-miR-1200	miR-1200 (miRNAs w/seed UCCUGAG)	TargetScan Human	High (predicted)	REXO1L1P	REXO1 like 1, pseudogene		Other	other		Human
hsa-miR-1200	miR-1200 (miRNAs w/seed UCCUGAG)	TargetScan Human	High (predicted)	RP4_539M619			Other	other		Human
hsa-miR-1200	miR-1200 (miRNAs w/seed UCCUGAG)	TargetScan Human	High (predicted)	RPEL1	ribulose-5-phosphate-3-epimerase like 1	Cancer,Dermatological Diseases and Conditions,Hematological Disease,Immunological Disease,Organismal Injury and Abnormalities	Cytoplasm	enzyme		Human	Astrocytes,Cardiomyocytes,Crypt,Dendritic cells not otherwise specified,Dermis,Endothelial cells not otherwise specified,Epidermis,Fibroblasts,Heart,Hepatocytes,Keratinocytes,Kidney,Langerhans cells,Liver,Melanocytes,Other Cells,Other Epithelial cells,Other Nervous System,Other Neurons,Other Organ Systems,Pancreas,Placenta,Prostate Gland,Retina,Skin,Smooth Muscle,Smooth muscle cells not otherwise…
hsa-miR-1200	miR-1200 (miRNAs w/seed UCCUGAG)	TargetScan Human	High (predicted)	RPL18A	ribosomal protein L18a	Cancer,Connective Tissue Disorders,Endocrine System Disorders,Gastrointestinal Disease,Immunological Disease,Inflammatory Disease,Inflammatory Response,Neurological Disease,Organismal Injury and Abnormalities,Skeletal and Muscular Disorders	Cytoplasm	other	EIF2 Signaling	Human,Mouse,Rat	Activated CD56bright NK cells,Activated CD56dim NK cells,Activated helper T cells,Activated Vd1 Gamma-delta T cells,Activated Vd2 Gamma-delta T cells,Adipocytes,Adipose,Astrocytes,B lymphocytes not otherwise specified,BDCA-1+ dendritic cells,BDCA-3+ dendritic cells,Cardiomyocytes,CD56bright NK cells,CD56dim NK cells,Central memory cytotoxic T cells,Central memory helper T cells,Crypt,Cytotoxic T …
hsa-miR-1200	miR-1200 (miRNAs w/seed UCCUGAG)	TargetScan Human	High (predicted)	SLC26A6	solute carrier family 26 member 6	Cancer,Dermatological Diseases and Conditions,Endocrine System Disorders,Gastrointestinal Disease,Neurological Disease,Organismal Injury and Abnormalities,Renal and Urological Disease,Reproductive System Disease	Cytoplasm	transporter		Human,Mouse,Rat	Adipocytes,Adipose,Astrocytes,B lymphocytes not otherwise specified,BDCA-1+ dendritic cells,BDCA-3+ dendritic cells,Brain,Cardiomyocytes,Central memory cytotoxic T cells,Crypt,Dendritic cells not otherwise specified,Dermis,Effector memory cytotoxic T cells,Effector memory RA+ cytotoxic T cells,Effector T cells,Endothelial cells not otherwise specified,Epidermis,Fibroblasts,Granulosa cells,Heart,H…
hsa-miR-1200	miR-1200 (miRNAs w/seed UCCUGAG)	TargetScan Human	High (predicted)	SLC30A8	solute carrier family 30 member 8	Cancer,Dermatological Diseases and Conditions,Endocrine System Disorders,Gastrointestinal Disease,Hepatic System Disease,Hereditary Disorder,Metabolic Disease,Nutritional Disease,Organismal Injury and Abnormalities,Reproductive System Disease,Respiratory Disease	Cytoplasm	transporter		Human,Mouse,Rat	Adipose,Amygdala,Astrocytes,B lymphocytes not otherwise specified,Bladder,Cardiomyocytes,Central memory cytotoxic T cells,Cerebellum,Cerebral Cortex,Cytotoxic T cells,Dorsal Root Ganglion,Effector memory cytotoxic T cells,Effector memory RA+ cytotoxic T cells,Effector T cells,Epidermis,Fibroblasts,Heart,Hippocampus,Hypothalamus,Kidney,Large Intestine,Lung,Mammary Gland,NK cells not otherwise spec…
hsa-miR-1200	miR-1200 (miRNAs w/seed UCCUGAG)	TargetScan Human	High (predicted)	SLC35E3	solute carrier family 35 member E3	Cancer,Endocrine System Disorders,Gastrointestinal Disease,Organismal Injury and Abnormalities,Renal and Urological Disease,Respiratory Disease	Other	other		Human,Mouse,Rat	Activated CD56bright NK cells,Activated CD56dim NK cells,Activated helper T cells,Activated Vd1 Gamma-delta T cells,Activated Vd2 Gamma-delta T cells,Adipocytes,Adipose,Amygdala,Astrocytes,B lymphocytes not otherwise specified,BDCA-1+ dendritic cells,BDCA-3+ dendritic cells,Bladder,Cardiomyocytes,Central memory helper T cells,Cerebellum,Cerebral Cortex,Crypt,Cytotoxic T cells,Dendritic cells not …
hsa-miR-1200	miR-1200 (miRNAs w/seed UCCUGAG)	TargetScan Human	High (predicted)	SLC4A9	solute carrier family 4 member 9	Cancer,Dermatological Diseases and Conditions,Endocrine System Disorders,Gastrointestinal Disease,Organismal Injury and Abnormalities,Reproductive System Disease,Respiratory Disease	Plasma Membrane	transporter		Human,Mouse,Rat	Adipocytes,Adipose,Cardiomyocytes,Dermis,Endothelial cells not otherwise specified,Epidermis,Heart,Keratinocytes,Kidney,Microglia,Other Cells,Other Epithelial cells,Other Nervous System,Other Neurons,Other Organ Systems,Ovary,Placenta,Prostate Gland,Skeletal Muscle,Skin,T lymphocytes not otherwise specified,Testis,Thymus,Uterus
hsa-miR-1200	miR-1200 (miRNAs w/seed UCCUGAG)	TargetScan Human	High (predicted)	TCTA	T cell leukemia translocation altered	Gastrointestinal Disease,Inflammatory Disease,Organismal Injury and Abnormalities	Other	other		Human,Mouse,Rat	Adipocytes,Adipose,Amygdala,Astrocytes,B lymphocytes not otherwise specified,Bladder,Cardiomyocytes,Cerebellum,Cerebral Cortex,Crypt,Cytotoxic T cells,Dendritic cells not otherwise specified,Dermis,Dorsal Root Ganglion,Effector T cells,Endothelial cells not otherwise specified,Epidermis,Fibroblasts,Granulocytes not otherwise specified,Granulosa cells,Heart,Hematopoietic progenitor cells,Hepatocyt…
hsa-miR-1200	miR-1200 (miRNAs w/seed UCCUGAG)	TargetScan Human	High (predicted)	TCTN1	tectonic family member 1	Cancer,Dermatological Diseases and Conditions,Developmental Disorder,Endocrine System Disorders,Gastrointestinal Disease,Hereditary Disorder,Neurological Disease,Organismal Injury and Abnormalities,Renal and Urological Disease,Reproductive System Disease,Respiratory Disease,Skeletal and Muscular Disorders	Extracellular Space	other		Human,Mouse,Rat	Adipocytes,Adipose,Amygdala,Astrocytes,B lymphocytes not otherwise specified,BDCA-1+ dendritic cells,BDCA-3+ dendritic cells,Cardiomyocytes,Cerebellum,Cerebral Cortex,Crypt,Dendritic cells not otherwise specified,Dermis,Dorsal Root Ganglion,Endothelial cells not otherwise specified,Epidermis,Fibroblasts,Granulocytes not otherwise specified,Granulosa cells,Heart,Hematopoietic progenitor cells,Hepa…
hsa-miR-1200	miR-1200 (miRNAs w/seed UCCUGAG)	TargetScan Human	High (predicted)	TDRKH	tudor and KH domain containing	Cancer,Cardiovascular Disease,Dermatological Diseases and Conditions,Endocrine System Disorders,Gastrointestinal Disease,Hereditary Disorder,Neurological Disease,Organismal Injury and Abnormalities,Reproductive System Disease,Skeletal and Muscular Disorders	Cytoplasm	other		Human,Mouse,Rat	Activated CD56bright NK cells,Activated CD56dim NK cells,Activated Vd1 Gamma-delta T cells,Adipocytes,Adipose,Amygdala,Astrocytes,B lymphocytes not otherwise specified,BDCA-1+ dendritic cells,BDCA-3+ dendritic cells,Cardiomyocytes,Central memory helper T cells,Cerebellum,Crypt,Dendritic cells not otherwise specified,Dermis,Effector memory cytotoxic T cells,Effector memory RA+ cytotoxic T cells,En…
hsa-miR-1200	miR-1200 (miRNAs w/seed UCCUGAG)	TargetScan Human	High (predicted)	TEX38	testis expressed 38	Cancer,Endocrine System Disorders,Organismal Injury and Abnormalities	Other	other		Human,Mouse,Rat	Adipocytes,Adipose,Amygdala,B lymphocytes not otherwise specified,Bladder,Cerebellum,Cytotoxic T cells,Dendritic cells not otherwise specified,Endothelial cells not otherwise specified,Epidermis,Granulosa cells,Hippocampus,Hypothalamus,Kidney,Liver,Macrophages not otherwise specified,Mammary Gland,Microglia,Other Cells,Other Nervous System,Other Neurons,Ovary,Pituitary Gland,Placenta,Plasma cells…
hsa-miR-1200	miR-1200 (miRNAs w/seed UCCUGAG)	TargetScan Human	High (predicted)	THPO	thrombopoietin	Cancer,Cardiovascular Disease,Connective Tissue Disorders,Dermatological Diseases and Conditions,Developmental Disorder,Endocrine System Disorders,Gastrointestinal Disease,Hematological Disease,Hepatic System Disease,Hereditary Disorder,Immunological Disease,Inflammatory Disease,Inflammatory Response,Neurological Disease,Ophthalmic Disease,Organismal Injury and Abnormalities,Reproductive System D…	Extracellular Space	cytokine	Hematopoiesis from Multipotent Stem Cells,Role of JAK2 in Hormone-like Cytokine Signaling,Thrombopoietin Signaling	Human,Mouse,Rat	Adipocytes,Adipose,Astrocytes,B lymphocytes not otherwise specified,Blood platelets,Bone marrow cells not otherwise specified,Brain,Cardiomyocytes,Cerebral Cortex,Dermis,Endothelial cells not otherwise specified,Fibroblasts,Granulosa cells,Heart,Hematopoietic progenitor cells,Hepatocytes,Hippocampus,Immune cells not otherwise specified,Keratinocytes,Kidney,Liver,Macrophages not otherwise specifie…
hsa-miR-1200	miR-1200 (miRNAs w/seed UCCUGAG)	TargetScan Human	High (predicted)	THY1	Thy-1 cell surface antigen	Cancer,Cardiovascular Disease,Connective Tissue Disorders,Dermatological Diseases and Conditions,Endocrine System Disorders,Gastrointestinal Disease,Hematological Disease,Hepatic System Disease,Hypersensitivity Response,Immunological Disease,Inflammatory Disease,Inflammatory Response,Metabolic Disease,Neurological Disease,Organismal Injury and Abnormalities,Psychological Disorders,Renal and Urolo…	Plasma Membrane	other	Granulocyte Adhesion and Diapedesis,Leukocyte Extravasation Signaling	Human,Mouse,Rat	Adipocytes,Adipose,Astrocytes,B lymphocytes not otherwise specified,Bone marrow cells not otherwise specified,Cardiomyocytes,CD34+ cells,Cytotoxic T cells,Dendritic cells not otherwise specified,Dermis,Dorsal Root Ganglion,Endothelial cells not otherwise specified,Epidermis,Epithelial cells not otherwise specified,Fibroblasts,Granulocytes not otherwise specified,Heart,Hematopoietic progenitor cel…
hsa-miR-1200	miR-1200 (miRNAs w/seed UCCUGAG)	TargetScan Human	High (predicted)	TINF2	TERF1 interacting nuclear factor 2	Cancer,Cardiovascular Disease,Dermatological Diseases and Conditions,Developmental Disorder,Gastrointestinal Disease,Hematological Disease,Hereditary Disorder,Neurological Disease,Organismal Injury and Abnormalities,Respiratory Disease	Nucleus	other	Telomerase Signaling,Telomere Extension by Telomerase	Human,Mouse,Rat	Adipocytes,Adipose,Astrocytes,B lymphocytes not otherwise specified,Brain,Cardiomyocytes,Crypt,Dendritic cells not otherwise specified,Dermis,Endothelial cells not otherwise specified,Epidermis,Fibroblasts,Granulocytes not otherwise specified,Granulosa cells,Heart,Hematopoietic progenitor cells,Hepatocytes,Keratinocytes,Kidney,Langerhans cells,Liver,Lung,Macrophages not otherwise specified,Mammar…
hsa-miR-1200	miR-1200 (miRNAs w/seed UCCUGAG)	TargetScan Human	High (predicted)	TM4SF1	transmembrane 4 L six family member 1	Cancer,Dermatological Diseases and Conditions,Endocrine System Disorders,Gastrointestinal Disease,Hematological Disease,Hepatic System Disease,Organismal Injury and Abnormalities,Reproductive System Disease,Skeletal and Muscular Disorders	Plasma Membrane	other		Human,Mouse,Rat	Adipocytes,Adipose,Astrocytes,B lymphocytes not otherwise specified,Cardiomyocytes,Cells not otherwise specified,Crypt,Dendritic cells not otherwise specified,Dermis,Endothelial cells not otherwise specified,Epidermis,Epithelial cells not otherwise specified,Fibroblasts,Granulocytes not otherwise specified,Granulosa cells,Heart,Hematopoietic progenitor cells,Hepatocytes,HUVEC cells,Keratinocytes,…
hsa-miR-1200	miR-1200 (miRNAs w/seed UCCUGAG)	TargetScan Human	High (predicted)	TMEM121	transmembrane protein 121	Cancer,Endocrine System Disorders,Gastrointestinal Disease,Organismal Injury and Abnormalities,Reproductive System Disease	Other	other		Human,Mouse,Rat	Adipocytes,Adipose,Amygdala,Astrocytes,B lymphocytes not otherwise specified,Cardiomyocytes,Cerebellum,Cerebral Cortex,Dendritic cells not otherwise specified,Dermis,Endothelial cells not otherwise specified,Epidermis,Fibroblasts,Granulosa cells,Heart,Hematopoietic progenitor cells,Hepatocytes,Hippocampus,Hypothalamus,Keratinocytes,Kidney,Langerhans cells,Liver,Lung,Macrophages not otherwise spec…
hsa-miR-1200	miR-1200 (miRNAs w/seed UCCUGAG)	TargetScan Human	High (predicted)	TMEM134	transmembrane protein 134	Cancer,Dermatological Diseases and Conditions,Endocrine System Disorders,Neurological Disease,Organismal Injury and Abnormalities	Cytoplasm	kinase		Human,Mouse,Rat	Activated CD56bright NK cells,Activated CD56dim NK cells,Activated helper T cells,Activated Vd1 Gamma-delta T cells,Activated Vd2 Gamma-delta T cells,Adipocytes,Adipose,Astrocytes,B lymphocytes not otherwise specified,BDCA-1+ dendritic cells,BDCA-3+ dendritic cells,Cardiomyocytes,CD56bright NK cells,CD56dim NK cells,Central memory cytotoxic T cells,Central memory helper T cells,Crypt,Cytotoxic T …
hsa-miR-1200	miR-1200 (miRNAs w/seed UCCUGAG)	TargetScan Human	High (predicted)	TMEM251	transmembrane protein 251	Cancer,Developmental Disorder,Neurological Disease,Organismal Injury and Abnormalities	Cytoplasm	other		Human,Mouse,Rat	Activated CD56bright NK cells,Activated helper T cells,Activated Vd1 Gamma-delta T cells,Activated Vd2 Gamma-delta T cells,Adipocytes,Adipose,Astrocytes,B lymphocytes not otherwise specified,BDCA-1+ dendritic cells,BDCA-3+ dendritic cells,Cardiomyocytes,Central memory cytotoxic T cells,Central memory helper T cells,Crypt,Cytotoxic T cells,Dendritic cells not otherwise specified,Dermis,Effector me…
hsa-miR-1200	miR-1200 (miRNAs w/seed UCCUGAG)	TargetScan Human	High (predicted)	TMEM59	transmembrane protein 59	Cancer,Cardiovascular Disease,Dermatological Diseases and Conditions,Developmental Disorder,Endocrine System Disorders,Gastrointestinal Disease,Hematological Disease,Immunological Disease,Inflammatory Disease,Metabolic Disease,Neurological Disease,Organismal Injury and Abnormalities,Psychological Disorders,Reproductive System Disease,Skeletal and Muscular Disorders	Plasma Membrane	peptidase		Human,Mouse,Rat	Activated CD56bright NK cells,Activated CD56dim NK cells,Activated helper T cells,Activated Vd1 Gamma-delta T cells,Activated Vd2 Gamma-delta T cells,Adipocytes,Adipose,Amygdala,Astrocytes,B lymphocytes not otherwise specified,BDCA-1+ dendritic cells,BDCA-3+ dendritic cells,Bladder,Cardiomyocytes,CD56bright NK cells,CD56dim NK cells,Central memory cytotoxic T cells,Central memory helper T cells,C…
hsa-miR-1200	miR-1200 (miRNAs w/seed UCCUGAG)	TargetScan Human	High (predicted)	TNFSF14	TNF superfamily member 14	Auditory Disease,Cancer,Cardiovascular Disease,Connective Tissue Disorders,Dermatological Diseases and Conditions,Developmental Disorder,Endocrine System Disorders,Gastrointestinal Disease,Hepatic System Disease,Immunological Disease,Infectious Disease,Inflammatory Disease,Inflammatory Response,Neurological Disease,Organismal Injury and Abnormalities,Renal and Urological Disease,Respiratory Disea…	Extracellular Space	cytokine	Airway Pathology in Chronic Obstructive Pulmonary Disease,Atherosclerosis Signaling,Cardiac Hypertrophy Signaling (Enhanced),CDX Gastrointestinal Cancer Signaling Pathway,Erythropoietin Signaling Pathway,Hepatic Cholestasis,HMGB1 Signaling,IL-17 Signaling,Inhibition of ARE-Mediated mRNA Degradation Pathway,Lymphotoxin β Receptor Signaling,Macrophage Classical Activation Signaling Pathway,Multiple…	Human,Mouse,Rat	Activated CD56bright NK cells,Activated CD56dim NK cells,Activated Vd1 Gamma-delta T cells,Activated Vd2 Gamma-delta T cells,Adipocytes,Adipose,B lymphocytes not otherwise specified,Bone marrow-derived dendritic cells,Brain,Cardiomyocytes,Dendritic cells not otherwise specified,Dermis,Effector memory cytotoxic T cells,Endothelial cells not otherwise specified,Epidermis,Fibroblasts,Granulocytes no…
hsa-miR-1200	miR-1200 (miRNAs w/seed UCCUGAG)	TargetScan Human	High (predicted)	TOMM40L	translocase of outer mitochondrial membrane 40 like	Cancer,Dermatological Diseases and Conditions,Endocrine System Disorders,Gastrointestinal Disease,Hematological Disease,Hepatic System Disease,Immunological Disease,Neurological Disease,Organismal Injury and Abnormalities	Cytoplasm	other	Necroptosis Signaling Pathway,Neutrophil Extracellular Trap Signaling Pathway,Sirtuin Signaling Pathway	Human,Mouse,Rat	Adipocytes,Adipose,Amygdala,Astrocytes,B lymphocytes not otherwise specified,BDCA-1+ dendritic cells,BDCA-3+ dendritic cells,Bladder,Cardiomyocytes,Cerebellum,Cerebral Cortex,Crypt,Cytotoxic T cells,Dendritic cells not otherwise specified,Dermis,Dorsal Root Ganglion,Effector T cells,Endothelial cells not otherwise specified,Epidermis,Fibroblasts,Granulocytes not otherwise specified,Granulosa cell…
hsa-miR-1200	miR-1200 (miRNAs w/seed UCCUGAG)	TargetScan Human	High (predicted)	TRAPPC2	trafficking protein particle complex subunit 2	Cancer,Connective Tissue Disorders,Developmental Disorder,Endocrine System Disorders,Gastrointestinal Disease,Hereditary Disorder,Metabolic Disease,Neurological Disease,Organismal Injury and Abnormalities,Psychological Disorders,Renal and Urological Disease,Skeletal and Muscular Disorders	Cytoplasm	other		Human,Mouse,Rat	Activated CD56bright NK cells,Activated CD56dim NK cells,Activated helper T cells,Activated Vd1 Gamma-delta T cells,Activated Vd2 Gamma-delta T cells,Adipocytes,Adipose,Amygdala,Astrocytes,B lymphocytes not otherwise specified,BDCA-1+ dendritic cells,BDCA-3+ dendritic cells,Bladder,Cardiomyocytes,CD56bright NK cells,Central memory cytotoxic T cells,Central memory helper T cells,Cerebellum,Cerebra…
hsa-miR-1200	miR-1200 (miRNAs w/seed UCCUGAG)	TargetScan Human	High (predicted)	TRAPPC6A	trafficking protein particle complex subunit 6A	Cancer,Dermatological Diseases and Conditions,Endocrine System Disorders,Gastrointestinal Disease,Organismal Injury and Abnormalities,Reproductive System Disease	Cytoplasm	other		Human,Mouse,Rat	Adipocytes,Adipose,Astrocytes,B lymphocytes not otherwise specified,Bladder,Cardiomyocytes,Crypt,Dendritic cells not otherwise specified,Dermis,Endothelial cells not otherwise specified,Epidermis,Fibroblasts,Granulocytes not otherwise specified,Granulosa cells,Heart,Hematopoietic progenitor cells,Hepatocytes,Keratinocytes,Kidney,Langerhans cells,Large Intestine,Liver,Lung,Macrophages not otherwis…
hsa-miR-1200	miR-1200 (miRNAs w/seed UCCUGAG)	TargetScan Human	High (predicted)	TRNP1	TMF1 regulated nuclear protein 1		Nucleus	other		Human,Mouse,Rat	Activated helper T cells,Adipocytes,Adipose,Amygdala,Astrocytes,B lymphocytes not otherwise specified,BDCA-1+ dendritic cells,BDCA-3+ dendritic cells,Bladder,Cardiomyocytes,Cerebellum,Cerebral Cortex,Crypt,Dendritic cells not otherwise specified,Dermis,Dorsal Root Ganglion,Endothelial cells not otherwise specified,Epidermis,Fibroblasts,Granulosa cells,Heart,Hepatocytes,Hippocampus,Hypothalamus,Ke…
hsa-miR-1200	miR-1200 (miRNAs w/seed UCCUGAG)	TargetScan Human	High (predicted)	TSPAN11	tetraspanin 11	Cancer,Endocrine System Disorders,Gastrointestinal Disease,Organismal Injury and Abnormalities,Reproductive System Disease	Other	other		Human,Mouse,Rat	Adipocytes,Adipose,Astrocytes,Cardiomyocytes,Dermis,Endothelial cells not otherwise specified,Epidermis,Fibroblasts,Granulosa cells,Heart,Hepatocytes,Keratinocytes,Kidney,Langerhans cells,Liver,Macrophages not otherwise specified,Mammary Gland,Melanocytes,Microglia,Other Cells,Other Epithelial cells,Other Nervous System,Other Neurons,Other Organ Systems,Ovary,Placenta,Prostate Gland,Retina,Skelet…
hsa-miR-1200	miR-1200 (miRNAs w/seed UCCUGAG)	TargetScan Human	High (predicted)	UBE3D	ubiquitin protein ligase E3D	Cancer,Dermatological Diseases and Conditions,Gastrointestinal Disease,Neurological Disease,Organismal Injury and Abnormalities,Respiratory Disease	Other	enzyme		Human,Mouse,Rat	Activated helper T cells,Adipocytes,Adipose,Astrocytes,B lymphocytes not otherwise specified,BDCA-1+ dendritic cells,BDCA-3+ dendritic cells,Cardiomyocytes,Crypt,Dendritic cells not otherwise specified,Dermis,Effector memory RA+ cytotoxic T cells,Endothelial cells not otherwise specified,Epidermis,Fibroblasts,Granulocytes not otherwise specified,Granulosa cells,Heart,Hematopoietic progenitor cell…
hsa-miR-1200	miR-1200 (miRNAs w/seed UCCUGAG)	TargetScan Human	High (predicted)	UGT3A1	UDP glycosyltransferase family 3 member A1	Cancer,Dermatological Diseases and Conditions,Endocrine System Disorders,Gastrointestinal Disease,Hepatic System Disease,Neurological Disease,Organismal Injury and Abnormalities,Reproductive System Disease	Cytoplasm	enzyme	Melatonin Degradation I,Nicotine Degradation II,Nicotine Degradation III,Serotonin Degradation,Superpathway of Melatonin Degradation,Thyroid Hormone Metabolism II (via Conjugation and/or Degradation)	Human,Mouse,Rat	B lymphocytes not otherwise specified,Bladder,Cardiomyocytes,Crypt,Heart,Hepatocytes,Kidney,Large Intestine,Liver,Macrophages not otherwise specified,Other Cells,Other Epithelial cells,Other Nervous System,Other Neurons,Other Organ Systems,Pituitary Gland,Placenta,Prostate Gland,Retina,Sertoli cells,Small Intestine,Stomach,Substantia Nigra,T lymphocytes not otherwise specified,Testis,Uterus,HS 57…
hsa-miR-1200	miR-1200 (miRNAs w/seed UCCUGAG)	TargetScan Human	High (predicted)	UQCR10	ubiquinol-cytochrome c reductase, complex III subunit X	Cancer,Endocrine System Disorders,Gastrointestinal Disease,Hereditary Disorder,Neurological Disease,Organismal Injury and Abnormalities,Psychological Disorders,Renal and Urological Disease,Reproductive System Disease,Skeletal and Muscular Disorders	Cytoplasm	enzyme	Mitochondrial Dysfunction,Oxidative Phosphorylation	Human,Mouse,Rat	Adipocytes,Adipose,Astrocytes,B lymphocytes not otherwise specified,BDCA-1+ dendritic cells,Brain,Cardiomyocytes,Central memory cytotoxic T cells,Crypt,Dendritic cells not otherwise specified,Dermis,Effector memory cytotoxic T cells,Effector memory RA+ cytotoxic T cells,Endothelial cells not otherwise specified,Epidermis,Fibroblasts,Granulocytes not otherwise specified,Granulosa cells,Heart,Hemat…
hsa-miR-1200	miR-1200 (miRNAs w/seed UCCUGAG)	TargetScan Human	High (predicted)	YY2	YY2 transcription factor	Cancer,Dermatological Diseases and Conditions,Endocrine System Disorders,Gastrointestinal Disease,Neurological Disease,Organismal Injury and Abnormalities,Reproductive System Disease,Respiratory Disease	Nucleus	transcription regulator		Human,Mouse	Activated Vd1 Gamma-delta T cells,Activated Vd2 Gamma-delta T cells,Adipocytes,Adipose,B lymphocytes not otherwise specified,Cardiomyocytes,Central memory helper T cells,Crypt,Dendritic cells not otherwise specified,Dermis,Effector memory cytotoxic T cells,Effector memory RA+ cytotoxic T cells,Endothelial cells not otherwise specified,Epidermis,Fibroblasts,Granulocytes not otherwise specified,Gra…
hsa-miR-1200	miR-1200 (miRNAs w/seed UCCUGAG)	TargetScan Human	High (predicted)	ZGLP1	zinc finger GATA like protein 1	Cancer,Dermatological Diseases and Conditions,Endocrine System Disorders,Gastrointestinal Disease,Infectious Disease,Metabolic Disease,Organismal Injury and Abnormalities,Reproductive System Disease	Nucleus	transcription regulator		Human,Mouse,Rat	Adipocytes,Adipose,Astrocytes,B lymphocytes not otherwise specified,Cardiomyocytes,Crypt,Dendritic cells not otherwise specified,Dermis,Endothelial cells not otherwise specified,Epidermis,Fibroblasts,Granulosa cells,Heart,Hematopoietic progenitor cells,Hepatocytes,Keratinocytes,Kidney,Langerhans cells,Liver,Lung,Macrophages not otherwise specified,Mammary Gland,Melanocytes,Microglia,Monocytes not…
hsa-miR-1200	miR-1200 (miRNAs w/seed UCCUGAG)	TargetScan Human	High (predicted)	ZNF146	zinc finger protein 146	Cancer,Dermatological Diseases and Conditions,Gastrointestinal Disease,Neurological Disease,Organismal Injury and Abnormalities,Reproductive System Disease	Nucleus	transcription regulator		Human,Mouse,Rat	Activated CD56bright NK cells,Activated CD56dim NK cells,Activated helper T cells,Activated Vd1 Gamma-delta T cells,Activated Vd2 Gamma-delta T cells,Adipocytes,Adipose,Amygdala,Astrocytes,B lymphocytes not otherwise specified,BDCA-1+ dendritic cells,BDCA-3+ dendritic cells,Bladder,Cardiomyocytes,CD56dim NK cells,Central memory cytotoxic T cells,Central memory helper T cells,Cerebellum,Cerebral C…
hsa-miR-1200	miR-1200 (miRNAs w/seed UCCUGAG)	TargetScan Human	High (predicted)	ZNF19	zinc finger protein 19	Cancer,Endocrine System Disorders,Gastrointestinal Disease,Organismal Injury and Abnormalities,Reproductive System Disease	Nucleus	transcription regulator		Human	Adipocytes,Adipose,Astrocytes,B lymphocytes not otherwise specified,Cardiomyocytes,Crypt,Dendritic cells not otherwise specified,Dermis,Endothelial cells not otherwise specified,Epidermis,Fibroblasts,Granulosa cells,Heart,Hematopoietic progenitor cells,Hepatocytes,Immature monocyte-derived dendritic cells,Keratinocytes,Kidney,Langerhans cells,Liver,Lung,Macrophages not otherwise specified,Mammary…
hsa-miR-1200	miR-1200 (miRNAs w/seed UCCUGAG)	TargetScan Human	High (predicted)	ZNF397	zinc finger protein 397	Cancer,Endocrine System Disorders,Gastrointestinal Disease,Neurological Disease,Organismal Injury and Abnormalities,Reproductive System Disease,Respiratory Disease	Nucleus	transcription regulator		Human,Mouse,Rat	Activated helper T cells,Adipocytes,Adipose,Amygdala,Astrocytes,B lymphocytes not otherwise specified,BDCA-1+ dendritic cells,BDCA-3+ dendritic cells,Bladder,Cardiomyocytes,Central memory cytotoxic T cells,Cerebellum,Cerebral Cortex,Crypt,Cytotoxic T cells,Dendritic cells not otherwise specified,Dermis,Dorsal Root Ganglion,Effector memory cytotoxic T cells,Effector memory RA+ cytotoxic T cells,Ef…
hsa-miR-1200	miR-1200 (miRNAs w/seed UCCUGAG)	TargetScan Human	High (predicted)	ZNF451	zinc finger protein 451	Cancer,Dermatological Diseases and Conditions,Developmental Disorder,Endocrine System Disorders,Gastrointestinal Disease,Hematological Disease,Hepatic System Disease,Hereditary Disorder,Immunological Disease,Metabolic Disease,Neurological Disease,Organismal Injury and Abnormalities,Reproductive System Disease	Nucleus	enzyme		Human,Mouse,Rat	Activated CD56bright NK cells,Activated CD56dim NK cells,Activated helper T cells,Activated Vd1 Gamma-delta T cells,Activated Vd2 Gamma-delta T cells,Adipocytes,Adipose,Amygdala,Astrocytes,B lymphocytes not otherwise specified,BDCA-1+ dendritic cells,BDCA-3+ dendritic cells,Bladder,Cardiomyocytes,CD56bright NK cells,CD56dim NK cells,Central memory cytotoxic T cells,Central memory helper T cells,C…
hsa-miR-1200	miR-1200 (miRNAs w/seed UCCUGAG)	TargetScan Human	High (predicted)	ZNF589	zinc finger protein 589	Cancer,Dermatological Diseases and Conditions,Endocrine System Disorders,Gastrointestinal Disease,Neurological Disease,Organismal Injury and Abnormalities	Nucleus	transcription regulator		Human	Activated helper T cells,Activated Vd1 Gamma-delta T cells,Adipocytes,Adipose,Astrocytes,B lymphocytes not otherwise specified,BDCA-1+ dendritic cells,BDCA-3+ dendritic cells,Cardiomyocytes,Central memory cytotoxic T cells,Central memory helper T cells,Crypt,Dendritic cells not otherwise specified,Dermis,Effector memory cytotoxic T cells,Effector memory helper T cells,Effector memory RA+ cytotoxi…
hsa-miR-1200	miR-1200 (miRNAs w/seed UCCUGAG)	TargetScan Human	High (predicted)	ZNF616	zinc finger protein 616	Cancer,Dermatological Diseases and Conditions,Endocrine System Disorders,Gastrointestinal Disease,Hepatic System Disease,Neurological Disease,Organismal Injury and Abnormalities,Reproductive System Disease	Nucleus	transcription regulator		Human,Mouse	Adipocytes,Adipose,Astrocytes,B lymphocytes not otherwise specified,Cardiomyocytes,Crypt,Dendritic cells not otherwise specified,Dermis,Endothelial cells not otherwise specified,Epidermis,Fibroblasts,Granulosa cells,Heart,Hematopoietic progenitor cells,Hepatocytes,Immature monocyte-derived dendritic cells,Keratinocytes,Kidney,Langerhans cells,Liver,Lung,Macrophages not otherwise specified,Mammary…
hsa-miR-1200	miR-1200 (miRNAs w/seed UCCUGAG)	TargetScan Human	High (predicted)	ZNF691	zinc finger protein 691	Cancer,Dermatological Diseases and Conditions,Gastrointestinal Disease,Neurological Disease,Organismal Injury and Abnormalities,Reproductive System Disease	Nucleus	transcription regulator		Human,Mouse,Rat	Adipocytes,Adipose,Astrocytes,B lymphocytes not otherwise specified,Cardiomyocytes,Crypt,Cytotoxic T cells,Dendritic cells not otherwise specified,Dermis,Endothelial cells not otherwise specified,Epidermis,Fibroblasts,Granulocytes not otherwise specified,Granulosa cells,Heart,Hematopoietic progenitor cells,Hepatocytes,Keratinocytes,Kidney,Langerhans cells,Large Intestine,Liver,Lung,Macrophages no…
hsa-miR-1200	miR-1200 (miRNAs w/seed UCCUGAG)	TargetScan Human	High (predicted)	ZNF717	zinc finger protein 717	Cancer,Dermatological Diseases and Conditions,Endocrine System Disorders,Gastrointestinal Disease,Hematological Disease,Hepatic System Disease,Immunological Disease,Neurological Disease,Organismal Injury and Abnormalities,Renal and Urological Disease,Reproductive System Disease,Respiratory Disease,Skeletal and Muscular Disorders	Nucleus	transcription regulator		Human,Mouse,Rat	Activated helper T cells,Adipocytes,Adipose,Amygdala,Astrocytes,B lymphocytes not otherwise specified,BDCA-1+ dendritic cells,BDCA-3+ dendritic cells,Bladder,Cardiomyocytes,Central memory cytotoxic T cells,Cerebellum,Cerebral Cortex,Crypt,Cytotoxic T cells,Dendritic cells not otherwise specified,Dermis,Dorsal Root Ganglion,Effector T cells,Endothelial cells not otherwise specified,Epidermis,Fibro…
hsa-miR-1200	miR-1200 (miRNAs w/seed UCCUGAG)	TargetScan Human	High (predicted)	ZSCAN23	zinc finger and SCAN domain containing 23	Cancer,Dermatological Diseases and Conditions,Endocrine System Disorders,Organismal Injury and Abnormalities,Reproductive System Disease	Cytoplasm	transcription regulator		Human	Adipocytes,Adipose,Astrocytes,B lymphocytes not otherwise specified,Cardiomyocytes,Crypt,Endothelial cells not otherwise specified,Fibroblasts,Granulosa cells,Heart,Kidney,Mammary Gland,Mature monocyte-derived dendritic cells,Microglia,Other Cells,Other Epithelial cells,Other Nervous System,Other Neurons,Other Organ Systems,Ovary,Pancreas,Placenta,Plasma cells,Prostate Gland,Retina,Skeletal Muscl…
hsa-miR-942	miR-12202-3p (and other miRNAs w/seed CUUCUCU)	TargetScan Mouse	High (predicted)	1700019A02Rik	RIKEN cDNA 1700019A02 gene		Other	other		Mouse	Testis
hsa-miR-942	miR-12202-3p (and other miRNAs w/seed CUUCUCU)	TargetScan Mouse	High (predicted)	1700031M16Rik	RIKEN cDNA 1700031M16 gene		Other	other		Mouse	Testis
hsa-miR-942	miR-12202-3p (and other miRNAs w/seed CUUCUCU)	TargetScan Mouse	High (predicted)	3110021N24Rik			Other	other		Mouse
hsa-miR-942	miR-12202-3p (and other miRNAs w/seed CUUCUCU)	TargetScan Mouse	High (predicted)	3830408C21Rik	RIKEN cDNA 3830408C21 gene		Other	other		Mouse
hsa-miR-942	miR-12202-3p (and other miRNAs w/seed CUUCUCU)	TargetScan Mouse	High (predicted)	4732440D04Rik	RIKEN cDNA 4732440D04 gene		Other	other		Mouse
hsa-miR-942	miR-12202-3p (and other miRNAs w/seed CUUCUCU)	TargetScan Mouse	High (predicted)	4930533K18Rik	RIKEN cDNA 4930533K18 gene		Other	other		Mouse
hsa-miR-942	miR-12202-3p (and other miRNAs w/seed CUUCUCU)	TargetScan Mouse	High (predicted)	6720489N17Rik	RIKEN cDNA 6720489N17 gene		Other	other		Mouse
hsa-miR-942	miR-12202-3p (and other miRNAs w/seed CUUCUCU)	TargetScan Mouse	High (predicted)	A930009A15Rik	RIKEN cDNA A930009A15 gene		Other	other		Mouse	Adipose,Amygdala,B lymphocytes not otherwise specified,Bladder,Cerebellum,Cerebral Cortex,Cytotoxic T cells,Dorsal Root Ganglion,Effector T cells,Epidermis,Heart,Hippocampus,Hypothalamus,Kidney,Large Intestine,Liver,Lung,Mammary Gland,Olfactory Bulb,Ovary,Pituitary Gland,Placenta,Prostate Gland,Retina,Salivary Gland,Skeletal Muscle,Small Intestine,Spleen,Stomach,Substantia Nigra,Testis,Thymus,Ute…
hsa-miR-942	miR-12202-3p (and other miRNAs w/seed CUUCUCU)	TargetScan Mouse	High (predicted)	Adh6-ps1	alcohol dehydrogenase 6 (class V), pseudogene 1		Other	other		Mouse
hsa-miR-942	miR-12202-3p (and other miRNAs w/seed CUUCUCU)	TargetScan Mouse	High (predicted)	AFMID	arylformamidase	Cancer,Dermatological Diseases and Conditions,Endocrine System Disorders,Gastrointestinal Disease,Organismal Injury and Abnormalities,Respiratory Disease	Nucleus	enzyme	NAD biosynthesis II (from tryptophan),Tryptophan Degradation III (Eukaryotic),Tryptophan Degradation to 2-amino-3-carboxymuconate Semialdehyde	Human,Mouse,Rat	Adipocytes,Adipose,Astrocytes,B lymphocytes not otherwise specified,BDCA-1+ dendritic cells,Cardiomyocytes,Crypt,Dendritic cells not otherwise specified,Dermis,Endothelial cells not otherwise specified,Epidermis,Fibroblasts,Granulocytes not otherwise specified,Granulosa cells,Heart,Hematopoietic progenitor cells,Hepatocytes,Keratinocytes,Kidney,Langerhans cells,Liver,Lung,Macrophages not otherwis…
hsa-miR-942	miR-12202-3p (and other miRNAs w/seed CUUCUCU)	TargetScan Mouse	High (predicted)	AIMP1	aminoacyl tRNA synthetase complex interacting multifunctional protein 1	Cancer,Dermatological Diseases and Conditions,Developmental Disorder,Endocrine System Disorders,Gastrointestinal Disease,Hematological Disease,Hereditary Disorder,Immunological Disease,Infectious Disease,Inflammatory Disease,Inflammatory Response,Neurological Disease,Ophthalmic Disease,Organismal Injury and Abnormalities,Psychological Disorders,Respiratory Disease,Tumor Morphology	Extracellular Space	cytokine		Human,Mouse,Rat	Activated CD56bright NK cells,Activated helper T cells,Activated Vd1 Gamma-delta T cells,Activated Vd2 Gamma-delta T cells,Adipocytes,Adipose,Amygdala,Astrocytes,B lymphocytes not otherwise specified,BDCA-1+ dendritic cells,BDCA-3+ dendritic cells,Bladder,Brain,Cardiomyocytes,CD56dim NK cells,Central memory cytotoxic T cells,Central memory helper T cells,Cerebellum,Cerebral Cortex,Crypt,Cytotoxic…
hsa-miR-942	miR-12202-3p (and other miRNAs w/seed CUUCUCU)	TargetScan Mouse	High (predicted)	AMMECR1	AMMECR nuclear protein 1	Auditory Disease,Cancer,Connective Tissue Disorders,Endocrine System Disorders,Gastrointestinal Disease,Hematological Disease,Hereditary Disorder,Immunological Disease,Neurological Disease,Organismal Injury and Abnormalities,Renal and Urological Disease,Reproductive System Disease,Respiratory Disease	Nucleus	other		Human,Mouse,Rat	Adipocytes,Adipose,Astrocytes,B lymphocytes not otherwise specified,BDCA-1+ dendritic cells,BDCA-3+ dendritic cells,Cardiomyocytes,Central memory cytotoxic T cells,Crypt,Dendritic cells not otherwise specified,Dermis,Effector memory cytotoxic T cells,Effector memory RA+ cytotoxic T cells,Endothelial cells not otherwise specified,Epidermis,Fibroblasts,Granulocytes not otherwise specified,Granulosa…
hsa-miR-942	miR-12202-3p (and other miRNAs w/seed CUUCUCU)	TargetScan Human	High (predicted)	AMOTL1	angiomotin like 1	Cancer,Endocrine System Disorders,Gastrointestinal Disease,Hematological Disease,Immunological Disease,Neurological Disease,Organismal Injury and Abnormalities,Renal and Urological Disease,Reproductive System Disease	Plasma Membrane	other		Human,Mouse,Rat	Adipocytes,Adipose,Astrocytes,B lymphocytes not otherwise specified,Cardiomyocytes,Dendritic cells not otherwise specified,Dermis,Endothelial cells not otherwise specified,Epidermis,Fibroblasts,Granulocytes not otherwise specified,Granulosa cells,Heart,Hematopoietic progenitor cells,Hepatocytes,Keratinocytes,Kidney,Langerhans cells,Liver,Lung,Macrophages not otherwise specified,Mammary Gland,Mela…
hsa-miR-942	miR-12202-3p (and other miRNAs w/seed CUUCUCU)	TargetScan Mouse	High (predicted)	ANKRD11	ankyrin repeat domain containing 11	Cancer,Connective Tissue Disorders,Dental Disease,Dermatological Diseases and Conditions,Developmental Disorder,Endocrine System Disorders,Gastrointestinal Disease,Hematological Disease,Hepatic System Disease,Hereditary Disorder,Immunological Disease,Infectious Disease,Neurological Disease,Organismal Injury and Abnormalities,Psychological Disorders,Renal and Urological Disease,Reproductive System…	Nucleus	other		Human,Mouse,Rat	Activated helper T cells,Adipocytes,Adipose,Amygdala,Astrocytes,B lymphocytes not otherwise specified,BDCA-1+ dendritic cells,BDCA-3+ dendritic cells,Bladder,Cardiomyocytes,Central memory cytotoxic T cells,Cerebellum,Cerebral Cortex,Crypt,Cytotoxic T cells,Dendritic cells not otherwise specified,Dermis,Dorsal Root Ganglion,Effector memory cytotoxic T cells,Effector memory RA+ cytotoxic T cells,Ef…
hsa-miR-942	miR-12202-3p (and other miRNAs w/seed CUUCUCU)	TargetScan Mouse	High (predicted)	ANKRD26	ankyrin repeat domain containing 26	Cancer,Connective Tissue Disorders,Dermatological Diseases and Conditions,Developmental Disorder,Endocrine System Disorders,Gastrointestinal Disease,Hematological Disease,Hepatic System Disease,Hereditary Disorder,Neurological Disease,Organismal Injury and Abnormalities,Reproductive System Disease,Respiratory Disease	Nucleus	transcription regulator		Human,Mouse,Rat	Adipocytes,Adipose,Astrocytes,B lymphocytes not otherwise specified,BDCA-1+ dendritic cells,Cardiomyocytes,CD56dim NK cells,Crypt,Dendritic cells not otherwise specified,Dermis,Endothelial cells not otherwise specified,Epidermis,Fibroblasts,Granulocytes not otherwise specified,Granulosa cells,Heart,Hematopoietic progenitor cells,Hepatocytes,Keratinocytes,Kidney,Langerhans cells,Liver,Lung,Macroph…
hsa-miR-942	miR-12202-3p (and other miRNAs w/seed CUUCUCU)	TargetScan Mouse,TargetScan Human	High (predicted),Moderate (predicted)	ARPC3	actin related protein 2/3 complex subunit 3	Cardiovascular Disease,Connective Tissue Disorders,Dermatological Diseases and Conditions,Immunological Disease,Infectious Disease,Inflammatory Disease,Inflammatory Response,Organismal Injury and Abnormalities,Skeletal and Muscular Disorders	Cytoplasm	other	Actin Cytoskeleton Signaling,Actin Nucleation by ARP-WASP Complex,Axonal Guidance Signaling,CD28 Signaling in T Helper Cells,CDC42 Signaling,Clathrin-mediated Endocytosis Signaling,Ephrin Receptor Signaling,Epithelial Adherens Junction Signaling,FAK Signaling,Fcγ Receptor-mediated Phagocytosis in Macrophages and Monocytes,fMLP Signaling in Neutrophils,Integrin Signaling,Phagosome Formation,RAC Si…	Human,Mouse,Rat	Activated CD56bright NK cells,Activated CD56dim NK cells,Activated helper T cells,Activated Vd1 Gamma-delta T cells,Activated Vd2 Gamma-delta T cells,Adipocytes,Adipose,Amygdala,Astrocytes,B lymphocytes not otherwise specified,BDCA-1+ dendritic cells,BDCA-3+ dendritic cells,Bladder,Cardiomyocytes,CD56bright NK cells,CD56dim NK cells,Central memory cytotoxic T cells,Central memory helper T cells,C…
hsa-miR-942	miR-12202-3p (and other miRNAs w/seed CUUCUCU)	TargetScan Mouse,TargetScan Human	High (predicted),Moderate (predicted)	ARPC5L	actin related protein 2/3 complex subunit 5 like	Cancer,Endocrine System Disorders,Gastrointestinal Disease,Neurological Disease,Organismal Injury and Abnormalities,Reproductive System Disease	Cytoplasm	other	Actin Cytoskeleton Signaling,Actin Nucleation by ARP-WASP Complex,Axonal Guidance Signaling,CD28 Signaling in T Helper Cells,CDC42 Signaling,Clathrin-mediated Endocytosis Signaling,Ephrin Receptor Signaling,Epithelial Adherens Junction Signaling,FAK Signaling,Fcγ Receptor-mediated Phagocytosis in Macrophages and Monocytes,fMLP Signaling in Neutrophils,Integrin Signaling,Phagosome Formation,RAC Si…	Human,Mouse,Rat	Activated helper T cells,Adipocytes,Adipose,Amygdala,Astrocytes,B lymphocytes not otherwise specified,BDCA-1+ dendritic cells,BDCA-3+ dendritic cells,Bladder,Cardiomyocytes,Central memory cytotoxic T cells,Cerebellum,Cerebral Cortex,Crypt,Cytotoxic T cells,Dendritic cells not otherwise specified,Dermis,Dorsal Root Ganglion,Effector memory cytotoxic T cells,Effector memory RA+ cytotoxic T cells,Ef…
hsa-miR-942	miR-12202-3p (and other miRNAs w/seed CUUCUCU)	TargetScan Mouse	High (predicted)	ART1	ADP-ribosyltransferase 1	Cancer,Connective Tissue Disorders,Dermatological Diseases and Conditions,Gastrointestinal Disease,Hematological Disease,Immunological Disease,Inflammatory Disease,Inflammatory Response,Neurological Disease,Organismal Injury and Abnormalities,Reproductive System Disease,Skeletal and Muscular Disorders	Plasma Membrane	enzyme		Human,Mouse,Rat	Astrocytes,BDCA-1+ dendritic cells,BDCA-3+ dendritic cells,Cardiomyocytes,CD56bright NK cells,CD56dim NK cells,Central memory cytotoxic T cells,Dorsal Root Ganglion,Effector memory cytotoxic T cells,Effector memory RA+ cytotoxic T cells,Heart,Immature monocyte-derived dendritic cells,Microglia,Naive helper T cells,Other Cells,Other Nervous System,Other Neurons,Plasmacytoid dendritic cells
hsa-miR-942	miR-12202-3p (and other miRNAs w/seed CUUCUCU)	TargetScan Human	High (predicted)	ASCL1	achaete-scute family bHLH transcription factor 1	Cancer,Dermatological Diseases and Conditions,Developmental Disorder,Endocrine System Disorders,Gastrointestinal Disease,Hereditary Disorder,Inflammatory Disease,Neurological Disease,Ophthalmic Disease,Organismal Injury and Abnormalities,Psychological Disorders,Reproductive System Disease,Respiratory Disease,Skeletal and Muscular Disorders	Nucleus	transcription regulator	Myelination Signaling Pathway	Human,Mouse,Rat	Adipocytes,Adipose,Amygdala,Astrocytes,B lymphocytes not otherwise specified,Brain,Cardiomyocytes,Cerebellum,Cerebral Cortex,Cortical neurons,Embryonic stem cells,Epidermis,Fibroblasts,Heart,Hepatocytes,Hippocampus,Hypothalamus,Large Intestine,Liver,Mammary Gland,Microglia,Olfactory Bulb,Other Cells,Other Epithelial cells,Other Nervous System,Other Neurons,Other Stem cells,Other Tissues and Prima…
hsa-miR-942	miR-12202-3p (and other miRNAs w/seed CUUCUCU)	TargetScan Human	High (predicted)	ATP23	ATP23 metallopeptidase and ATP synthase assembly factor homolog	Cancer,Endocrine System Disorders,Gastrointestinal Disease,Organismal Injury and Abnormalities,Respiratory Disease	Plasma Membrane	kinase		Human,Mouse,Rat	Activated helper T cells,Adipocytes,Adipose,B lymphocytes not otherwise specified,BDCA-1+ dendritic cells,BDCA-3+ dendritic cells,Central memory cytotoxic T cells,Dendritic cells not otherwise specified,Effector memory cytotoxic T cells,Effector memory RA+ cytotoxic T cells,Endothelial cells not otherwise specified,Fibroblasts,Granulocytes not otherwise specified,Granulosa cells,Immature monocyte…
hsa-miR-942	miR-12202-3p (and other miRNAs w/seed CUUCUCU)	TargetScan Mouse	High (predicted)	ATP5MC2	ATP synthase membrane subunit c locus 2	Immunological Disease,Organismal Injury and Abnormalities	Cytoplasm	transporter	Mitochondrial Dysfunction,Oxidative Phosphorylation	Human,Mouse,Rat	Adipocytes,Adipose,Amygdala,B lymphocytes not otherwise specified,Bladder,Cerebellum,Cerebral Cortex,Cytotoxic T cells,Dendritic cells not otherwise specified,Dorsal Root Ganglion,Effector T cells,Endothelial cells not otherwise specified,Epidermis,Fibroblasts,Granulocytes not otherwise specified,Granulosa cells,Heart,Hippocampus,Hypothalamus,Kidney,Large Intestine,Liver,Lung,Macrophages not othe…
hsa-miR-942	miR-12202-3p (and other miRNAs w/seed CUUCUCU)	TargetScan Human	High (predicted)	ATP6AP1L	ATPase H+ transporting accessory protein 1 like (pseudogene)	Cancer,Endocrine System Disorders,Gastrointestinal Disease,Hepatic System Disease,Organismal Injury and Abnormalities	Other	other		Human	B lymphocytes not otherwise specified,Cardiomyocytes,Dermis,Endothelial cells not otherwise specified,Epidermis,Fibroblasts,Granulocytes not otherwise specified,Heart,Hepatocytes,Keratinocytes,Kidney,Liver,Lung,Macrophages not otherwise specified,Monocyte-derived macrophage,Monocytes not otherwise specified,Other Cells,Other Epithelial cells,Other Nervous System,Other Neurons,Other Organ Systems,…
hsa-miR-942	miR-12202-3p (and other miRNAs w/seed CUUCUCU)	TargetScan Mouse	High (predicted)	AVPR1B	arginine vasopressin receptor 1B	Cancer,Cardiovascular Disease,Dermatological Diseases and Conditions,Developmental Disorder,Endocrine System Disorders,Gastrointestinal Disease,Hematological Disease,Hepatic System Disease,Hereditary Disorder,Immunological Disease,Infectious Disease,Metabolic Disease,Neurological Disease,Organismal Injury and Abnormalities,Renal and Urological Disease,Reproductive System Disease	Plasma Membrane	G-protein coupled receptor	Breast Cancer Regulation by Stathmin1,CREB Signaling in Neurons,FAK Signaling,G-Protein Coupled Receptor Signaling,Gαq Signaling,Phagosome Formation,S100 Family Signaling Pathway	Human,Mouse,Rat	Adipocytes,Adipose,Amygdala,Brain,Brainstem,Cardiomyocytes,Cerebellum,Cerebral Cortex,Fibroblasts,Heart,Hippocampus,Hypothalamus,Kidney,Lung,Medulla Oblongata,Olfactory Bulb,Other Nervous System,Other Neurons,Other Tissues and Primary Cells,Pituitary Gland,Prostate Gland,Spleen,Striatum,Substantia Nigra,Thymus,Uterus,Other Cell Line
hsa-miR-942	miR-12202-3p (and other miRNAs w/seed CUUCUCU)	TargetScan Mouse	High (predicted)	B230307C23Rik	RIKEN cDNA B230307C23 gene		Other	other		Mouse
hsa-miR-942	miR-12202-3p (and other miRNAs w/seed CUUCUCU)	TargetScan Mouse,TargetScan Human	High (predicted),Moderate (predicted)	BARX2	BARX homeobox 2	Cancer,Dermatological Diseases and Conditions,Endocrine System Disorders,Gastrointestinal Disease,Hematological Disease,Hepatic System Disease,Immunological Disease,Organismal Injury and Abnormalities,Renal and Urological Disease,Respiratory Disease	Nucleus	transcription regulator		Human,Mouse,Rat	Adipocytes,Adipose,Astrocytes,B lymphocytes not otherwise specified,Brain,Cardiomyocytes,CD56bright NK cells,Crypt,Dendritic cells not otherwise specified,Dermis,Endothelial cells not otherwise specified,Epidermis,Fibroblasts,Heart,Hepatocytes,Keratinocytes,Kidney,Langerhans cells,Liver,Lung,Macrophages not otherwise specified,Mammary Gland,Melanocytes,Monocytes not otherwise specified,Other Cell…
hsa-miR-942	miR-12202-3p (and other miRNAs w/seed CUUCUCU)	TargetScan Mouse	High (predicted)	BC051142	cDNA sequence BC051142		Nucleus	other		Mouse,Rat	Testis
hsa-miR-942	miR-12202-3p (and other miRNAs w/seed CUUCUCU)	TargetScan Human	High (predicted)	BOC	BOC cell adhesion associated, oncogene regulated	Cancer,Connective Tissue Disorders,Dermatological Diseases and Conditions,Developmental Disorder,Endocrine System Disorders,Gastrointestinal Disease,Hepatic System Disease,Neurological Disease,Organismal Injury and Abnormalities,Respiratory Disease,Skeletal and Muscular Disorders	Plasma Membrane	other		Human,Mouse,Rat	Adipocytes,Adipose,Astrocytes,Brain,Cardiomyocytes,Cerebellum,Dendritic cells not otherwise specified,Dermis,Dorsal Root Ganglion,Endothelial cells not otherwise specified,Epidermis,Fibroblasts,Granulosa cells,Heart,Hepatocytes,Keratinocytes,Kidney,Langerhans cells,Large Intestine,Liver,Lung,Macrophages not otherwise specified,Mammary Gland,Melanocytes,Microglia,Other Cells,Other Epithelial cells…
hsa-miR-942	miR-12202-3p (and other miRNAs w/seed CUUCUCU)	TargetScan Human	High (predicted)	BOLA1	bolA family member 1	Cancer,Organismal Injury and Abnormalities	Cytoplasm	other		Human,Mouse,Rat	Activated helper T cells,Activated Vd1 Gamma-delta T cells,Activated Vd2 Gamma-delta T cells,Adipocytes,Adipose,Astrocytes,B lymphocytes not otherwise specified,Cardiomyocytes,Central memory helper T cells,Crypt,Cytotoxic T cells,Dendritic cells not otherwise specified,Dermis,Effector memory helper T cells,Endothelial cells not otherwise specified,Epidermis,Fibroblasts,Granulocytes not otherwise …
hsa-miR-942	miR-12202-3p (and other miRNAs w/seed CUUCUCU)	TargetScan Mouse	High (predicted)	BRI3BP	BRI3 binding protein	Cancer,Dermatological Diseases and Conditions,Endocrine System Disorders,Gastrointestinal Disease,Neurological Disease,Organismal Injury and Abnormalities,Respiratory Disease	Extracellular Space	other		Human,Mouse,Rat	Activated helper T cells,Adipocytes,Adipose,Astrocytes,B lymphocytes not otherwise specified,BDCA-1+ dendritic cells,BDCA-3+ dendritic cells,Cardiomyocytes,Crypt,Dendritic cells not otherwise specified,Dermis,Effector memory cytotoxic T cells,Effector memory RA+ cytotoxic T cells,Endothelial cells not otherwise specified,Epidermis,Fibroblasts,Granulocytes not otherwise specified,Granulosa cells,H…
hsa-miR-942	miR-12202-3p (and other miRNAs w/seed CUUCUCU)	TargetScan Mouse	High (predicted)	C1orf56	chromosome 1 open reading frame 56	Cancer,Gastrointestinal Disease,Organismal Injury and Abnormalities,Renal and Urological Disease	Other	other		Human,Mouse,Rat	Adipocytes,Adipose,Astrocytes,B lymphocytes not otherwise specified,Cardiomyocytes,Crypt,Dendritic cells not otherwise specified,Dermis,Endothelial cells not otherwise specified,Epidermis,Fibroblasts,Granulocytes not otherwise specified,Granulosa cells,Heart,Hematopoietic progenitor cells,Hepatocytes,Keratinocytes,Kidney,Langerhans cells,Liver,Lung,Macrophages not otherwise specified,Mammary Glan…
hsa-miR-942	miR-12202-3p (and other miRNAs w/seed CUUCUCU)	TargetScan Mouse	High (predicted)	C4orf33	chromosome 4 open reading frame 33	Cancer,Cardiovascular Disease,Dermatological Diseases and Conditions,Infectious Disease,Organismal Injury and Abnormalities,Reproductive System Disease	Other	other		Human,Mouse,Rat	Adipocytes,Adipose,Amygdala,Astrocytes,B lymphocytes not otherwise specified,BDCA-1+ dendritic cells,BDCA-3+ dendritic cells,Bladder,Cardiomyocytes,Central memory cytotoxic T cells,Cerebellum,Cerebral Cortex,Crypt,Cytotoxic T cells,Dendritic cells not otherwise specified,Dermis,Dorsal Root Ganglion,Effector memory cytotoxic T cells,Effector memory RA+ cytotoxic T cells,Effector T cells,Endothelia…
hsa-miR-942	miR-12202-3p (and other miRNAs w/seed CUUCUCU)	TargetScan Mouse	High (predicted)	C9orf78	chromosome 9 open reading frame 78	Cancer,Connective Tissue Disorders,Dermatological Diseases and Conditions,Gastrointestinal Disease,Hepatic System Disease,Immunological Disease,Inflammatory Disease,Inflammatory Response,Neurological Disease,Organismal Injury and Abnormalities,Reproductive System Disease,Skeletal and Muscular Disorders	Nucleus	other		Human,Mouse	Activated CD56bright NK cells,Activated CD56dim NK cells,Activated helper T cells,Activated Vd1 Gamma-delta T cells,Activated Vd2 Gamma-delta T cells,Adipocytes,Adipose,Amygdala,Astrocytes,B lymphocytes not otherwise specified,BDCA-1+ dendritic cells,BDCA-3+ dendritic cells,Bladder,Cardiomyocytes,CD56bright NK cells,CD56dim NK cells,Central memory cytotoxic T cells,Central memory helper T cells,C…
hsa-miR-942	miR-12202-3p (and other miRNAs w/seed CUUCUCU)	TargetScan Human	High (predicted)	CALHM1	calcium homeostasis modulator 1	Cancer,Dermatological Diseases and Conditions,Endocrine System Disorders,Gastrointestinal Disease,Metabolic Disease,Neurological Disease,Organismal Injury and Abnormalities,Psychological Disorders,Reproductive System Disease	Plasma Membrane	ion channel	Gustation Pathway	Human,Mouse,Rat	Astrocytes,BDCA-1+ dendritic cells,BDCA-3+ dendritic cells,Cardiomyocytes,Central memory cytotoxic T cells,Effector memory cytotoxic T cells,Effector memory RA+ cytotoxic T cells,Heart,Kidney,Langerhans cells,Mature monocyte-derived dendritic cells,Monocyte-derived macrophage,Monocytes not otherwise specified,NK cells not otherwise specified,Other Cells,Other Nervous System,Other Neurons,Placenta…
hsa-miR-942	miR-12202-3p (and other miRNAs w/seed CUUCUCU)	TargetScan Human	High (predicted)	CAPS2	calcyphosine 2	Cancer,Dermatological Diseases and Conditions,Endocrine System Disorders,Gastrointestinal Disease,Organismal Injury and Abnormalities	Other	other		Human,Mouse,Rat	Adipocytes,Adipose,Astrocytes,B lymphocytes not otherwise specified,Brain,Cardiomyocytes,Cerebellum,Crypt,Dendritic cells not otherwise specified,Dermis,Endothelial cells not otherwise specified,Epidermis,Fibroblasts,Granulosa cells,Heart,Hematopoietic progenitor cells,Hepatocytes,Keratinocytes,Kidney,Langerhans cells,Liver,Lung,Macrophages not otherwise specified,Mammary Gland,Microglia,Monocyte…
hsa-miR-942	miR-12202-3p (and other miRNAs w/seed CUUCUCU)	TargetScan Human	High (predicted)	CCBE1	collagen and calcium binding EGF domains 1	Cancer,Cardiovascular Disease,Dermatological Diseases and Conditions,Developmental Disorder,Endocrine System Disorders,Gastrointestinal Disease,Hematological Disease,Hepatic System Disease,Hereditary Disorder,Inflammatory Response,Organismal Injury and Abnormalities,Reproductive System Disease,Respiratory Disease	Extracellular Space	other		Human,Mouse,Rat	Adipocytes,Adipose,Astrocytes,B lymphocytes not otherwise specified,Cardiomyocytes,Dendritic cells not otherwise specified,Dermis,Endothelial cells not otherwise specified,Epidermis,Fibroblasts,Granulocytes not otherwise specified,Granulosa cells,Heart,Hepatocytes,Keratinocytes,Kidney,Langerhans cells,Liver,Lung,Macrophages not otherwise specified,Mammary Gland,Melanocytes,Microglia,Monocytes not…
hsa-miR-942	miR-12202-3p (and other miRNAs w/seed CUUCUCU)	TargetScan Human	High (predicted)	CCDC62	coiled-coil domain containing 62	Cancer,Dermatological Diseases and Conditions,Endocrine System Disorders,Gastrointestinal Disease,Hepatic System Disease,Organismal Injury and Abnormalities	Nucleus	transcription regulator		Human,Mouse,Rat	Adipocytes,Adipose,Astrocytes,B lymphocytes not otherwise specified,Cardiomyocytes,Dendritic cells not otherwise specified,Dermis,Endothelial cells not otherwise specified,Epidermis,Fibroblasts,Granulosa cells,Heart,Keratinocytes,Langerhans cells,Liver,Macrophages not otherwise specified,Mammary Gland,Melanocytes,Microglia,Monocytes not otherwise specified,NK cells not otherwise specified,Other C…
hsa-miR-942	miR-12202-3p (and other miRNAs w/seed CUUCUCU)	TargetScan Mouse	High (predicted)	CCDC68	coiled-coil domain containing 68	Cancer,Dermatological Diseases and Conditions,Endocrine System Disorders,Gastrointestinal Disease,Metabolic Disease,Neurological Disease,Organismal Injury and Abnormalities	Cytoplasm	other		Human,Mouse	Adipocytes,Adipose,Astrocytes,B lymphocytes not otherwise specified,Bladder,Brain,Cardiomyocytes,Crypt,Cytotoxic T cells,Dendritic cells not otherwise specified,Dermis,Dorsal Root Ganglion,Effector T cells,Endothelial cells not otherwise specified,Epidermis,Fibroblasts,Granulocytes not otherwise specified,Granulosa cells,Heart,Hematopoietic progenitor cells,Hepatocytes,Keratinocytes,Kidney,Langer…
hsa-miR-942	miR-12202-3p (and other miRNAs w/seed CUUCUCU)	TargetScan Mouse	High (predicted)	CCDC9B	coiled-coil domain containing 9B	Cancer,Endocrine System Disorders,Gastrointestinal Disease,Hematological Disease,Immunological Disease,Infectious Disease,Organismal Injury and Abnormalities,Renal and Urological Disease,Respiratory Disease	Other	other		Human,Mouse	Adipocytes,Adipose,B lymphocytes not otherwise specified,Dendritic cells not otherwise specified,Endothelial cells not otherwise specified,Fibroblasts,Granulosa cells,Kidney,Lung,Macrophages not otherwise specified,Mammary Gland,Other Cells,Other Epithelial cells,Other Nervous System,Other Organ Systems,Ovary,Pancreas,Placenta,Prostate Gland,Smooth Muscle,Smooth muscle cells not otherwise specifi…
hsa-miR-942	miR-12202-3p (and other miRNAs w/seed CUUCUCU)	TargetScan Human	High (predicted)	CCKAR	cholecystokinin A receptor	Cancer,Dermatological Diseases and Conditions,Developmental Disorder,Endocrine System Disorders,Gastrointestinal Disease,Hepatic System Disease,Neurological Disease,Organismal Injury and Abnormalities,Psychological Disorders,Reproductive System Disease,Respiratory Disease	Plasma Membrane	G-protein coupled receptor	Breast Cancer Regulation by Stathmin1,CREB Signaling in Neurons,FAK Signaling,G-Protein Coupled Receptor Signaling,GPCR-Mediated Integration of Enteroendocrine Signaling Exemplified by an L Cell,Insulin Secretion Signaling Pathway,Phagosome Formation,S100 Family Signaling Pathway	Human,Mouse,Rat	Adrenal Gland,Beta islet cells,Brain,Cardiomyocytes,Cerebral Ventricles,Dorsal Root Ganglion,Heart,Hypothalamus,Kidney,Large Intestine,Liver,Lung,Memory B cells,Neurons not otherwise specified,Organ Systems not otherwise specified,Other Cells,Other Nervous System,Other Neurons,Other Organ Systems,Pancreas,Smooth Muscle,Smooth muscle cells not otherwise specified,Spleen,Stomach,Trigeminal Ganglion…
hsa-miR-942	miR-12202-3p (and other miRNAs w/seed CUUCUCU)	TargetScan Human	High (predicted)	CCL14	C-C motif chemokine ligand 14	Connective Tissue Disorders,Dermatological Diseases and Conditions,Hypersensitivity Response,Immunological Disease,Inflammatory Disease,Inflammatory Response,Organismal Injury and Abnormalities,Skeletal and Muscular Disorders	Extracellular Space	cytokine	Agranulocyte Adhesion and Diapedesis,Granulocyte Adhesion and Diapedesis,Pathogen Induced Cytokine Storm Signaling Pathway	Human	Adipocytes,Adipose,B lymphocytes not otherwise specified,Cardiomyocytes,Crypt,Dendritic cells not otherwise specified,Dermis,Endothelial cells not otherwise specified,Epidermis,Fibroblasts,Granulocytes not otherwise specified,Heart,Hematopoietic progenitor cells,Hepatocytes,Keratinocytes,Kidney,Langerhans cells,Large Intestine,Liver,Lung,Macrophages not otherwise specified,Mammary Gland,Other Cel…
hsa-miR-942	miR-12202-3p (and other miRNAs w/seed CUUCUCU)	TargetScan Human	High (predicted)	CCL16	C-C motif chemokine ligand 16	Cancer,Cardiovascular Disease,Connective Tissue Disorders,Endocrine System Disorders,Gastrointestinal Disease,Hypersensitivity Response,Immunological Disease,Inflammatory Disease,Inflammatory Response,Metabolic Disease,Organismal Injury and Abnormalities,Renal and Urological Disease,Reproductive System Disease,Skeletal and Muscular Disorders	Extracellular Space	cytokine	Agranulocyte Adhesion and Diapedesis,Granulocyte Adhesion and Diapedesis,Pathogen Induced Cytokine Storm Signaling Pathway	Human	Activated Vd1 Gamma-delta T cells,Adipocytes,Adipose,B lymphocytes not otherwise specified,Cardiomyocytes,Crypt,Dendritic cells not otherwise specified,Endothelial cells not otherwise specified,Heart,Hematopoietic progenitor cells,Hepatocytes,Kidney,Langerhans cells,Liver,Macrophages not otherwise specified,Other Epithelial cells,Other Organ Systems,PBMCs,Peripheral blood monocytes,Skin,T lymphoc…
hsa-miR-942	miR-12202-3p (and other miRNAs w/seed CUUCUCU)	TargetScan Human	High (predicted)	CCL25	C-C motif chemokine ligand 25	Cancer,Connective Tissue Disorders,Developmental Disorder,Endocrine System Disorders,Gastrointestinal Disease,Immunological Disease,Inflammatory Disease,Inflammatory Response,Neurological Disease,Organismal Injury and Abnormalities,Psychological Disorders,Reproductive System Disease,Skeletal and Muscular Disorders	Extracellular Space	cytokine	Agranulocyte Adhesion and Diapedesis,Granulocyte Adhesion and Diapedesis,Pathogen Induced Cytokine Storm Signaling Pathway	Human,Mouse,Rat	Astrocytes,B lymphocytes not otherwise specified,Brain,Cardiomyocytes,Cerebral Cortex,Crypt,Dendritic cells not otherwise specified,Epithelial cells not otherwise specified,Granulosa cells,Heart,Hippocampus,Other Cells,Other Epithelial cells,Other Nervous System,Other Neurons,Other NK cells,Other Organ Systems,Ovary,Placenta,Plasma cells,Skeletal Muscle,Small Intestine,Stomach,Stromal cells,T lym…
hsa-miR-942	miR-12202-3p (and other miRNAs w/seed CUUCUCU)	TargetScan Mouse	High (predicted)	CCN6	cellular communication network factor 6	Cancer,Connective Tissue Disorders,Developmental Disorder,Endocrine System Disorders,Gastrointestinal Disease,Hereditary Disorder,Organismal Injury and Abnormalities,Renal and Urological Disease,Reproductive System Disease,Respiratory Disease,Skeletal and Muscular Disorders	Extracellular Space	growth factor		Human,Mouse,Rat	Adipocytes,Adipose,Cardiomyocytes,Cartilage Tissue,Chondrocytes,Endothelial cells not otherwise specified,Fibroblasts,Heart,Kidney,Other Cells,Other Epithelial cells,Other Nervous System,Ovary,Placenta,Prostate Gland,Small Intestine,Smooth Muscle,Smooth muscle cells not otherwise specified,Testis,A549-ATCC,HuH7,Other Cell Line,Other Hepatoma Cell Lines,OVCAR-4,SW-620
hsa-miR-942	miR-12202-3p (and other miRNAs w/seed CUUCUCU)	TargetScan Mouse	High (predicted)	CCR1	C-C motif chemokine receptor 1	Auditory Disease,Cancer,Cardiovascular Disease,Connective Tissue Disorders,Dermatological Diseases and Conditions,Developmental Disorder,Endocrine System Disorders,Gastrointestinal Disease,Hematological Disease,Hepatic System Disease,Hereditary Disorder,Hypersensitivity Response,Immunological Disease,Infectious Disease,Inflammatory Disease,Inflammatory Response,Metabolic Disease,Neurological Dise…	Plasma Membrane	G-protein coupled receptor	Agranulocyte Adhesion and Diapedesis,Breast Cancer Regulation by Stathmin1,CREB Signaling in Neurons,FAK Signaling,G-Protein Coupled Receptor Signaling,Granulocyte Adhesion and Diapedesis,IL-10 Signaling,Neutrophil Extracellular Trap Signaling Pathway,Pathogen Induced Cytokine Storm Signaling Pathway,Pathogenesis of Multiple Sclerosis,Phagosome Formation,S100 Family Signaling Pathway,Th1 and Th2 …	Human,Mouse,Rat	Activated CD56dim NK cells,Activated helper T cells,Activated Vd2 Gamma-delta T cells,Adipocytes,Adipose,B lymphocytes not otherwise specified,BDCA-1+ dendritic cells,Blood platelets,Bone marrow cells not otherwise specified,Brain,Cardiomyocytes,CD56dim NK cells,Central memory helper T cells,Cerebral Cortex,Cytotoxic T cells,Dendritic cells not otherwise specified,Dermis,Dorsal Root Ganglion,Effe…
hsa-miR-942	miR-12202-3p (and other miRNAs w/seed CUUCUCU)	TargetScan Mouse,TargetScan Human	High (predicted),Moderate (predicted)	CD83	CD83 molecule	Cancer,Cardiovascular Disease,Connective Tissue Disorders,Dermatological Diseases and Conditions,Endocrine System Disorders,Gastrointestinal Disease,Hematological Disease,Immunological Disease,Infectious Disease,Inflammatory Disease,Inflammatory Response,Metabolic Disease,Neurological Disease,Organismal Injury and Abnormalities,Psychological Disorders,Renal and Urological Disease,Reproductive Sys…	Plasma Membrane	transmembrane receptor	Communication between Innate and Adaptive Immune Cells,Crosstalk between Dendritic Cells and Natural Killer Cells,Dendritic Cell Maturation,TREM1 Signaling	Human,Mouse,Rat	Activated CD56bright NK cells,Activated CD56dim NK cells,Activated helper T cells,Activated Vd1 Gamma-delta T cells,Activated Vd2 Gamma-delta T cells,Adipocytes,Adipose,Adrenal Gland,Astrocytes,B lymphocytes not otherwise specified,BDCA-1+ dendritic cells,BDCA-3+ dendritic cells,Brain,Cardiomyocytes,CD56bright NK cells,CD56dim NK cells,Central memory cytotoxic T cells,Central memory helper T cell…
hsa-miR-942	miR-12202-3p (and other miRNAs w/seed CUUCUCU)	TargetScan Human	High (predicted)	CDC42BPA	CDC42 binding protein kinase alpha	Cancer,Dermatological Diseases and Conditions,Developmental Disorder,Endocrine System Disorders,Gastrointestinal Disease,Hematological Disease,Hepatic System Disease,Immunological Disease,Infectious Disease,Inflammatory Disease,Neurological Disease,Organismal Injury and Abnormalities,Psychological Disorders,Reproductive System Disease,Respiratory Disease	Cytoplasm	kinase	CDC42 Signaling	Human,Mouse,Rat	Adipocytes,Adipose,Astrocytes,B lymphocytes not otherwise specified,BDCA-1+ dendritic cells,BDCA-3+ dendritic cells,Brain,Cardiomyocytes,CD56dim NK cells,Crypt,Dendritic cells not otherwise specified,Dermis,Endothelial cells not otherwise specified,Epidermis,Fibroblasts,Granulocytes not otherwise specified,Granulosa cells,Heart,Hematopoietic progenitor cells,Hepatocytes,Immature monocyte-derived …
hsa-miR-942	miR-12202-3p (and other miRNAs w/seed CUUCUCU)	TargetScan Mouse	High (predicted)	CDH20	cadherin 20	Cancer,Dermatological Diseases and Conditions,Endocrine System Disorders,Gastrointestinal Disease,Hepatic System Disease,Neurological Disease,Organismal Injury and Abnormalities,Reproductive System Disease	Plasma Membrane	other	Gα12/13 Signaling,RHOGDI Signaling,Signaling by Rho Family GTPases,Synaptogenesis Signaling Pathway	Human,Mouse,Rat	Adipocytes,Adipose,Amygdala,Astrocytes,B lymphocytes not otherwise specified,Bladder,Brain,Cardiomyocytes,Cerebellum,Cerebral Cortex,Cytotoxic T cells,Dendritic cells not otherwise specified,Dorsal Root Ganglion,Effector T cells,Endothelial cells not otherwise specified,Epidermis,Fibroblasts,Heart,Hippocampus,Hypothalamus,Kidney,Large Intestine,Liver,Lung,Macrophages not otherwise specified,Mamma…
hsa-miR-942	miR-12202-3p (and other miRNAs w/seed CUUCUCU)	TargetScan Human	High (predicted)	CDKL3	cyclin dependent kinase like 3	Cancer,Dermatological Diseases and Conditions,Endocrine System Disorders,Gastrointestinal Disease,Hematological Disease,Hepatic System Disease,Immunological Disease,Neurological Disease,Organismal Injury and Abnormalities,Reproductive System Disease,Respiratory Disease	Cytoplasm	kinase		Human,Mouse,Rat	Adipocytes,Adipose,Astrocytes,B lymphocytes not otherwise specified,BDCA-1+ dendritic cells,BDCA-3+ dendritic cells,Cardiomyocytes,Central memory cytotoxic T cells,Cerebellum,Crypt,Cytotoxic T cells,Dendritic cells not otherwise specified,Dermis,Effector memory cytotoxic T cells,Effector memory RA+ cytotoxic T cells,Endothelial cells not otherwise specified,Epidermis,Fibroblasts,Granulocytes not …
hsa-miR-942	miR-12202-3p (and other miRNAs w/seed CUUCUCU)	TargetScan Human	High (predicted)	CEBPZOS	CEBPZ opposite strand	Cancer,Endocrine System Disorders,Gastrointestinal Disease,Organismal Injury and Abnormalities,Respiratory Disease	Other	other		Human	Adipocytes,Adipose,Astrocytes,B lymphocytes not otherwise specified,Cardiomyocytes,Crypt,Dendritic cells not otherwise specified,Endothelial cells not otherwise specified,Fibroblasts,Granulocytes not otherwise specified,Granulosa cells,Heart,Hematopoietic progenitor cells,Hepatocytes,Kidney,Liver,Lung,Macrophages not otherwise specified,Mammary Gland,Microglia,Monocytes not otherwise specified,NK…
hsa-miR-942	miR-12202-3p (and other miRNAs w/seed CUUCUCU)	TargetScan Mouse	High (predicted)	CENPS/CENPS-CORT	centromere protein S	Cancer,Endocrine System Disorders,Gastrointestinal Disease,Neurological Disease,Organismal Injury and Abnormalities,Respiratory Disease	Nucleus	other		Human,Mouse,Rat	Activated CD56bright NK cells,Activated CD56dim NK cells,Activated helper T cells,Activated Vd1 Gamma-delta T cells,Activated Vd2 Gamma-delta T cells,Adipocytes,Adipose,Amygdala,B lymphocytes not otherwise specified,BDCA-1+ dendritic cells,BDCA-3+ dendritic cells,Central memory cytotoxic T cells,Central memory helper T cells,Cerebellum,Cerebral Cortex,Cytotoxic T cells,Dendritic cells not otherwi…
hsa-miR-942	miR-12202-3p (and other miRNAs w/seed CUUCUCU)	TargetScan Mouse,TargetScan Human	High (predicted),Moderate (predicted)	CFAP97	cilia and flagella associated protein 97	Cancer,Endocrine System Disorders,Gastrointestinal Disease,Hematological Disease,Hepatic System Disease,Immunological Disease,Neurological Disease,Organismal Injury and Abnormalities	Other	other		Human,Mouse,Rat	Adipocytes,Adipose,Amygdala,Astrocytes,B lymphocytes not otherwise specified,BDCA-1+ dendritic cells,BDCA-3+ dendritic cells,Bladder,Cardiomyocytes,Central memory cytotoxic T cells,Cerebellum,Crypt,Cytotoxic T cells,Dendritic cells not otherwise specified,Dorsal Root Ganglion,Effector memory cytotoxic T cells,Effector memory RA+ cytotoxic T cells,Effector T cells,Endothelial cells not otherwise s…
hsa-miR-942	miR-12202-3p (and other miRNAs w/seed CUUCUCU)	TargetScan Mouse	High (predicted)	CHCHD3	coiled-coil-helix-coiled-coil-helix domain containing 3	Cancer,Dermatological Diseases and Conditions,Gastrointestinal Disease,Hematological Disease,Immunological Disease,Neurological Disease,Organismal Injury and Abnormalities,Reproductive System Disease	Cytoplasm	transcription regulator		Human,Mouse,Rat	Activated CD56bright NK cells,Activated CD56dim NK cells,Activated helper T cells,Activated Vd1 Gamma-delta T cells,Activated Vd2 Gamma-delta T cells,Adipocytes,Adipose,Amygdala,Astrocytes,B lymphocytes not otherwise specified,BDCA-1+ dendritic cells,BDCA-3+ dendritic cells,Bladder,Cardiomyocytes,Central memory cytotoxic T cells,Central memory helper T cells,Cerebellum,Cerebral Cortex,Crypt,Cytot…
hsa-miR-942	miR-12202-3p (and other miRNAs w/seed CUUCUCU)	TargetScan Human	High (predicted)	CHCHD7	coiled-coil-helix-coiled-coil-helix domain containing 7		Cytoplasm	other		Human,Mouse,Rat	Adipocytes,Adipose,Amygdala,Astrocytes,B lymphocytes not otherwise specified,Bladder,Cardiomyocytes,Cerebellum,Cerebral Cortex,Crypt,Cytotoxic T cells,Dendritic cells not otherwise specified,Dermis,Dorsal Root Ganglion,Effector T cells,Endothelial cells not otherwise specified,Epidermis,Fibroblasts,Granulocytes not otherwise specified,Granulosa cells,Heart,Hematopoietic progenitor cells,Hepatocyt…
hsa-miR-942	miR-12202-3p (and other miRNAs w/seed CUUCUCU)	TargetScan Human	High (predicted)	CHP2	calcineurin like EF-hand protein 2	Cancer,Dermatological Diseases and Conditions,Endocrine System Disorders,Gastrointestinal Disease,Metabolic Disease,Neurological Disease,Organismal Injury and Abnormalities	Cytoplasm	other		Human,Mouse,Rat	Cardiomyocytes,Crypt,Dermis,Dorsal Root Ganglion,Endothelial cells not otherwise specified,Epidermis,Fibroblasts,Granulocytes not otherwise specified,Granulosa cells,Heart,Keratinocytes,Kidney,Langerhans cells,Large Intestine,Macrophages not otherwise specified,Mammary Gland,Melanocytes,Other Cells,Other Epithelial cells,Other Nervous System,Other Organ Systems,Ovary,Placenta,Prostate Gland,Skin,…
hsa-miR-942	miR-12202-3p (and other miRNAs w/seed CUUCUCU)	TargetScan Human	High (predicted)	CHRDL1	chordin like 1	Cancer,Dermatological Diseases and Conditions,Developmental Disorder,Endocrine System Disorders,Gastrointestinal Disease,Hematological Disease,Hepatic System Disease,Hereditary Disorder,Immunological Disease,Ophthalmic Disease,Organismal Injury and Abnormalities,Reproductive System Disease,Respiratory Disease	Extracellular Space	other		Human,Mouse,Rat	Adipocytes,Adipose,Astrocytes,B lymphocytes not otherwise specified,Cardiomyocytes,Dendritic cells not otherwise specified,Dermis,Endothelial cells not otherwise specified,Epidermis,Fibroblasts,Granulocytes not otherwise specified,Granulosa cells,Heart,Hepatocytes,Keratinocytes,Kidney,Langerhans cells,Liver,Lung,Macrophages not otherwise specified,Mammary Gland,Melanocytes,Microglia,Neutrophils,O…
hsa-miR-942	miR-12202-3p (and other miRNAs w/seed CUUCUCU)	TargetScan Mouse,TargetScan Human	High (predicted),Moderate (predicted)	CHUK	component of inhibitor of nuclear factor kappa B kinase complex	Antimicrobial Response,Cancer,Cardiovascular Disease,Connective Tissue Disorders,Dental Disease,Dermatological Diseases and Conditions,Developmental Disorder,Endocrine System Disorders,Gastrointestinal Disease,Hematological Disease,Hepatic System Disease,Hereditary Disorder,Immunological Disease,Infectious Disease,Inflammatory Disease,Inflammatory Response,Metabolic Disease,Neurological Disease,O…	Cytoplasm	kinase	4-1BB Signaling in T Lymphocytes,Activation of IRF by Cytosolic Pattern Recognition Receptors,Activin Inhibin Signaling Pathway,Acute Phase Response Signaling,Altered T Cell and B Cell Signaling in Rheumatoid Arthritis,Angiopoietin Signaling,Antioxidant Action of Vitamin C,Apoptosis Signaling,April Mediated Signaling,B Cell Activating Factor Signaling,B Cell Receptor Signaling,Cardiac Hypertrophy…	Human,Mouse,Rat	Adipocytes,Adipose,Amygdala,Astrocytes,B lymphocytes not otherwise specified,Bladder,Brain,Cardiomyocytes,Cerebellum,Cerebral Cortex,Crypt,Cytotoxic T cells,Dendritic cells not otherwise specified,Dermis,Dorsal Root Ganglion,Effector T cells,Endothelial cells not otherwise specified,Epidermis,Fibroblasts,Granulocytes not otherwise specified,Granulosa cells,Heart,Hematopoietic progenitor cells,Hep…
hsa-miR-942	miR-12202-3p (and other miRNAs w/seed CUUCUCU)	TargetScan Mouse,TargetScan Human	High (predicted),Moderate (predicted)	CIR1	corepressor interacting with RBPJ, CIR1	Cancer,Endocrine System Disorders,Gastrointestinal Disease,Hematological Disease,Hepatic System Disease,Immunological Disease,Infectious Disease,Neurological Disease,Organismal Injury and Abnormalities,Reproductive System Disease	Nucleus	transcription regulator		Human,Mouse,Rat	Activated CD56bright NK cells,Activated helper T cells,Activated Vd1 Gamma-delta T cells,Activated Vd2 Gamma-delta T cells,Adipocytes,Adipose,Amygdala,Astrocytes,B lymphocytes not otherwise specified,BDCA-1+ dendritic cells,BDCA-3+ dendritic cells,Cardiomyocytes,CD56bright NK cells,CD56dim NK cells,Central memory cytotoxic T cells,Central memory helper T cells,Cerebellum,Crypt,Cytotoxic T cells,D…
hsa-miR-942	miR-12202-3p (and other miRNAs w/seed CUUCUCU)	TargetScan Mouse	High (predicted)	CLDN8	claudin 8	Cancer,Endocrine System Disorders,Gastrointestinal Disease,Neurological Disease,Organismal Injury and Abnormalities,Reproductive System Disease,Respiratory Disease	Plasma Membrane	other	Agranulocyte Adhesion and Diapedesis,Granulocyte Adhesion and Diapedesis,Leukocyte Extravasation Signaling,Sertoli Cell-Sertoli Cell Junction Signaling,Tight Junction Signaling	Human,Mouse,Rat	Activated Vd2 Gamma-delta T cells,Adipocytes,Adipose,B lymphocytes not otherwise specified,Bladder,CD56bright NK cells,CD56dim NK cells,Cerebellum,Crypt,Cytotoxic T cells,Dendritic cells not otherwise specified,Dermis,Endothelial cells not otherwise specified,Epidermis,Fibroblasts,Keratinocytes,Kidney,Langerhans cells,Large Intestine,Liver,Lung,Macrophages not otherwise specified,Mammary Gland,Me…
hsa-miR-942	miR-12202-3p (and other miRNAs w/seed CUUCUCU)	TargetScan Human	High (predicted)	CLEC6A	C-type lectin domain containing 6A	Antimicrobial Response,Cancer,Dermatological Diseases and Conditions,Endocrine System Disorders,Gastrointestinal Disease,Hematological Disease,Immunological Disease,Infectious Disease,Inflammatory Disease,Inflammatory Response,Metabolic Disease,Neurological Disease,Ophthalmic Disease,Organismal Injury and Abnormalities,Renal and Urological Disease	Plasma Membrane	transmembrane receptor	Role of Pattern Recognition Receptors in Recognition of Bacteria and Viruses	Human,Mouse	Adipose,Bladder,Cardiomyocytes,Dermis,Heart,Hematopoietic progenitor cells,Kidney,Langerhans cells,Large Intestine,Lung,Macrophages not otherwise specified,Monocyte-derived dendritic cells not otherwise specified,Monocytes not otherwise specified,Neutrophils,Other Cells,Other Dendritic cells,Other Nervous System,Other Neurons,Placenta,Prostate Gland,Spleen,Thymus,Uterus,J774,RAW 264.7
hsa-miR-942	miR-12202-3p (and other miRNAs w/seed CUUCUCU)	TargetScan Mouse	High (predicted)	CLSTN3	calsyntenin 3	Cancer,Dermatological Diseases and Conditions,Developmental Disorder,Endocrine System Disorders,Gastrointestinal Disease,Infectious Disease,Neurological Disease,Organismal Injury and Abnormalities,Psychological Disorders,Reproductive System Disease	Plasma Membrane	other		Human,Mouse,Rat	Activated Vd1 Gamma-delta T cells,Activated Vd2 Gamma-delta T cells,Adipocytes,Adipose,Amygdala,Astrocytes,B lymphocytes not otherwise specified,Cardiomyocytes,Cerebellum,Cerebral Cortex,Crypt,Cytotoxic T cells,Dendritic cells not otherwise specified,Dermis,Dorsal Root Ganglion,Effector T cells,Endothelial cells not otherwise specified,Epidermis,Fibroblasts,Granulocytes not otherwise specified,Gr…
hsa-miR-942	miR-12202-3p (and other miRNAs w/seed CUUCUCU)	TargetScan Mouse	High (predicted)	CMC4	C-X9-C motif containing 4	Cancer,Endocrine System Disorders,Gastrointestinal Disease,Organismal Injury and Abnormalities	Cytoplasm	other		Human,Mouse,Rat	Adipocytes,Adipose,Astrocytes,B lymphocytes not otherwise specified,Crypt,Dendritic cells not otherwise specified,Dermis,Endothelial cells not otherwise specified,Epidermis,Fibroblasts,Granulocytes not otherwise specified,Granulosa cells,Hematopoietic progenitor cells,Hepatocytes,Keratinocytes,Kidney,Langerhans cells,Liver,Lung,Macrophages not otherwise specified,Mammary Gland,Melanocytes,Microgl…
hsa-miR-942	miR-12202-3p (and other miRNAs w/seed CUUCUCU)	TargetScan Mouse	High (predicted)	CMTM8	CKLF like MARVEL transmembrane domain containing 8	Cancer,Dermatological Diseases and Conditions,Endocrine System Disorders,Neurological Disease,Organismal Injury and Abnormalities,Psychological Disorders,Reproductive System Disease	Extracellular Space	cytokine		Human,Mouse,Rat	Adipocytes,Adipose,Astrocytes,B lymphocytes not otherwise specified,Brain,Cardiomyocytes,Cerebral Cortex,Crypt,Dendritic cells not otherwise specified,Dermis,Endothelial cells not otherwise specified,Epidermis,Fibroblasts,Granulosa cells,Heart,Hematopoietic progenitor cells,Hepatocytes,Immature monocyte-derived dendritic cells,Keratinocytes,Kidney,Langerhans cells,Liver,Lung,Macrophages not other…
hsa-miR-942	miR-12202-3p (and other miRNAs w/seed CUUCUCU)	TargetScan Mouse	High (predicted)	CPLX2	complexin 2	Cancer,Dermatological Diseases and Conditions,Developmental Disorder,Endocrine System Disorders,Gastrointestinal Disease,Hereditary Disorder,Infectious Disease,Metabolic Disease,Neurological Disease,Organismal Injury and Abnormalities,Psychological Disorders,Skeletal and Muscular Disorders	Cytoplasm	other	Huntington's Disease Signaling,SNARE Signaling Pathway,Synaptogenesis Signaling Pathway	Human,Mouse,Rat	Adipose,Amygdala,Astrocytes,B lymphocytes not otherwise specified,Beta islet cells,Bladder,Brain,Cardiomyocytes,Cerebellum,Cerebral Cortex,Dorsal Root Ganglion,Endothelial cells not otherwise specified,Epidermis,Fibroblasts,Heart,Hippocampus,Hypothalamus,Kidney,Liver,Microglia,Olfactory Bulb,Other Cells,Other Epithelial cells,Other Nervous System,Other Neurons,Other Organ Systems,Ovary,Pancreas,P…
hsa-miR-942	miR-12202-3p (and other miRNAs w/seed CUUCUCU)	TargetScan Human	High (predicted)	CREG1	cellular repressor of E1A stimulated genes 1	Cancer,Cardiovascular Disease,Dermatological Diseases and Conditions,Endocrine System Disorders,Gastrointestinal Disease,Hepatic System Disease,Immunological Disease,Inflammatory Disease,Inflammatory Response,Metabolic Disease,Organismal Injury and Abnormalities,Reproductive System Disease,Skeletal and Muscular Disorders	Nucleus	transcription regulator		Human,Mouse,Rat	Activated CD56bright NK cells,Activated CD56dim NK cells,Activated Vd1 Gamma-delta T cells,Activated Vd2 Gamma-delta T cells,Adipocytes,Adipose,Amygdala,Astrocytes,B lymphocytes not otherwise specified,BDCA-1+ dendritic cells,BDCA-3+ dendritic cells,Bladder,Cardiomyocytes,CD56bright NK cells,CD56dim NK cells,Central memory cytotoxic T cells,Central memory helper T cells,Cerebellum,Cerebral Cortex…
hsa-miR-942	miR-12202-3p (and other miRNAs w/seed CUUCUCU)	TargetScan Human	High (predicted)	CTD-2140B24.4			Other	other		Human
hsa-miR-942	miR-12202-3p (and other miRNAs w/seed CUUCUCU)	TargetScan Mouse	High (predicted)	Cts3	cathepsin 3		Cytoplasm	peptidase	Phagosome Maturation,Role Of Osteoblasts In Rheumatoid Arthritis Signaling Pathway	Mouse	Placenta
hsa-miR-942	miR-12202-3p (and other miRNAs w/seed CUUCUCU)	TargetScan Mouse	High (predicted)	Ctsm	cathepsin M		Cytoplasm	peptidase	Phagosome Maturation,Role Of Osteoblasts In Rheumatoid Arthritis Signaling Pathway	Mouse,Rat	Placenta
hsa-miR-942	miR-12202-3p (and other miRNAs w/seed CUUCUCU)	TargetScan Mouse	High (predicted)	CTXN3	cortexin 3	Cancer,Neurological Disease,Organismal Injury and Abnormalities,Renal and Urological Disease,Reproductive System Disease,Respiratory Disease	Other	other		Human,Mouse,Rat	Astrocytes,B lymphocytes not otherwise specified,Kidney,Macrophages not otherwise specified,Other Cells,Other Epithelial cells,Other Nervous System,Other Neurons,T lymphocytes not otherwise specified,Testis,Trigeminal Ganglion,ACHN,MDA-MB-231,PC-3,U251
hsa-miR-942	miR-12202-3p (and other miRNAs w/seed CUUCUCU)	TargetScan Mouse	High (predicted)	Cyb5r3	cytochrome b5 reductase 3	Cancer,Organismal Injury and Abnormalities,Reproductive System Disease	Cytoplasm	enzyme		Mouse,Rat	Adipose,Amygdala,B lymphocytes not otherwise specified,Bladder,Cerebellum,Cerebral Cortex,Cytotoxic T cells,Dorsal Root Ganglion,Effector T cells,Epidermis,Heart,Hippocampus,Hypothalamus,Kidney,Large Intestine,Liver,Lung,Mammary Gland,Murine NKT cells,Olfactory Bulb,Ovary,Pancreas,Pituitary Gland,Placenta,Prostate Gland,Retina,Salivary Gland,Skeletal Muscle,Small Intestine,Spleen,Stomach,Substant…
hsa-miR-942	miR-12202-3p (and other miRNAs w/seed CUUCUCU)	TargetScan Mouse	High (predicted),Moderate (predicted)	Cyp2a12/Cyp2a22	cytochrome P450, family 2, subfamily a, polypeptide 12		Cytoplasm	enzyme	LPS/IL-1 Mediated Inhibition of RXR Function,NRF2-mediated Oxidative Stress Response,Oxidative Ethanol Degradation III	Mouse,Rat	Hepatocytes,Liver,Testis
hsa-miR-942	miR-12202-3p (and other miRNAs w/seed CUUCUCU)	TargetScan Human	High (predicted)	CYP2A6 (includes others)	cytochrome P450 family 2 subfamily A member 6	Cancer,Dermatological Diseases and Conditions,Endocrine System Disorders,Gastrointestinal Disease,Hematological Disease,Hepatic System Disease,Hereditary Disorder,Immunological Disease,Metabolic Disease,Neurological Disease,Organismal Injury and Abnormalities,Psychological Disorders,Renal and Urological Disease,Reproductive System Disease,Respiratory Disease	Cytoplasm	enzyme	Acetone Degradation I (to Methylglyoxal),Bupropion Degradation,Estrogen Biosynthesis,LPS/IL-1 Mediated Inhibition of RXR Function,Melatonin Degradation I,Nicotine Degradation II,Nicotine Degradation III,NRF2-mediated Oxidative Stress Response,Oxidative Ethanol Degradation III,PXR/RXR Activation,Superpathway of Melatonin Degradation	Human,Mouse,Rat	B lymphocytes not otherwise specified,Cardiomyocytes,Endothelial cells not otherwise specified,Esophagus,Fibroblasts,Granulosa cells,Heart,Hematopoietic progenitor cells,Hepatocytes,Liver,Lung,Macrophages not otherwise specified,Mammary Gland,Monocyte-derived macrophage,Other B lymphocytes,Other Cells,Other Epithelial cells,Other Nervous System,Other Neurons,Other Organ Systems,Other Tissues and …
hsa-miR-942	miR-12202-3p (and other miRNAs w/seed CUUCUCU)	TargetScan Mouse	High (predicted)	CYP2J2	cytochrome P450 family 2 subfamily J member 2	Cancer,Cardiovascular Disease,Dermatological Diseases and Conditions,Endocrine System Disorders,Gastrointestinal Disease,Inflammatory Response,Neurological Disease,Ophthalmic Disease,Organismal Injury and Abnormalities,Renal and Urological Disease,Reproductive System Disease,Skeletal and Muscular Disorders	Cytoplasm	enzyme	Acetone Degradation I (to Methylglyoxal),Bupropion Degradation,Estrogen Biosynthesis,LPS/IL-1 Mediated Inhibition of RXR Function,Melatonin Degradation I,Nicotine Degradation II,Nicotine Degradation III,NRF2-mediated Oxidative Stress Response,Oxidative Ethanol Degradation III,Superpathway of Melatonin Degradation	Human,Mouse,Rat	Astrocytes,B lymphocytes not otherwise specified,Cardiomyocytes,Crypt,Dendritic cells not otherwise specified,Dermis,Endothelial cells not otherwise specified,Epidermis,Epithelial cells not otherwise specified,Fibroblasts,Granulosa cells,Heart,Hepatocytes,Keratinocytes,Kidney,Langerhans cells,Large Intestine,Liver,Lung,Macrophages not otherwise specified,Mammary Gland,Microglia,Monocytes not othe…
hsa-miR-942	miR-12202-3p (and other miRNAs w/seed CUUCUCU)	TargetScan Human	High (predicted)	CYP3A5	cytochrome P450 family 3 subfamily A member 5	Cancer,Cardiovascular Disease,Dermatological Diseases and Conditions,Endocrine System Disorders,Gastrointestinal Disease,Hematological Disease,Hepatic System Disease,Immunological Disease,Inflammatory Response,Neurological Disease,Organismal Injury and Abnormalities,Psychological Disorders,Renal and Urological Disease,Reproductive System Disease,Respiratory Disease	Cytoplasm	enzyme	Acetone Degradation I (to Methylglyoxal),Aryl Hydrocarbon Receptor Signaling,Bupropion Degradation,Estrogen Biosynthesis,Hepatic Cholestasis,LPS/IL-1 Mediated Inhibition of RXR Function,Melatonin Degradation I,Nicotine Degradation II,Nicotine Degradation III,NRF2-mediated Oxidative Stress Response,PXR/RXR Activation,Role of JAK2 in Hormone-like Cytokine Signaling,Superpathway of Melatonin Degrada…	Human,Mouse,Rat	Adipocytes,Adipose,Adrenal Gland,Amygdala,Astrocytes,B lymphocytes not otherwise specified,Bladder,Cardiomyocytes,CD56dim NK cells,Central memory cytotoxic T cells,Cerebellum,Cerebral Cortex,Crypt,Cytotoxic T cells,Dendritic cells not otherwise specified,Dermis,Dorsal Root Ganglion,Effector memory cytotoxic T cells,Effector memory RA+ cytotoxic T cells,Effector T cells,Endothelial cells not other…
hsa-miR-942	miR-12202-3p (and other miRNAs w/seed CUUCUCU)	TargetScan Human	High (predicted)	DCAF4L2	DDB1 and CUL4 associated factor 4 like 2	Cancer,Dermatological Diseases and Conditions,Endocrine System Disorders,Gastrointestinal Disease,Organismal Injury and Abnormalities,Reproductive System Disease,Respiratory Disease	Other	other		Human	Cardiomyocytes,Endothelial cells not otherwise specified,Fibroblasts,Heart,Macrophages not otherwise specified,Other Cells,Other Nervous System,Testis
hsa-miR-942	miR-12202-3p (and other miRNAs w/seed CUUCUCU)	TargetScan Mouse	High (predicted)	DCLK3	doublecortin like kinase 3	Cancer,Dermatological Diseases and Conditions,Endocrine System Disorders,Gastrointestinal Disease,Hematological Disease,Hepatic System Disease,Immunological Disease,Neurological Disease,Organismal Injury and Abnormalities,Psychological Disorders	Cytoplasm	kinase		Human,Mouse,Rat	Adipocytes,Adipose,Amygdala,Brain,Cardiomyocytes,Cerebral Cortex,Crypt,Dorsal Root Ganglion,Effector memory RA+ cytotoxic T cells,Endothelial cells not otherwise specified,Fibroblasts,Granulosa cells,Heart,Hippocampus,Kidney,Langerhans cells,Liver,Macrophages not otherwise specified,Mammary Gland,Naive helper T cells,Neurons not otherwise specified,Other Cells,Other Epithelial cells,Other Nervous…
hsa-miR-942	miR-12202-3p (and other miRNAs w/seed CUUCUCU)	TargetScan Human	High (predicted)	DCT	dopachrome tautomerase	Cancer,Dermatological Diseases and Conditions,Developmental Disorder,Endocrine System Disorders,Gastrointestinal Disease,Hematological Disease,Hepatic System Disease,Hereditary Disorder,Immunological Disease,Inflammatory Response,Metabolic Disease,Neurological Disease,Ophthalmic Disease,Organismal Injury and Abnormalities,Reproductive System Disease,Skeletal and Muscular Disorders	Cytoplasm	enzyme	Aryl Hydrocarbon Receptor Signaling,Eumelanin Biosynthesis,Melanocyte Development and Pigmentation Signaling	Human,Mouse,Rat	Astrocytes,Cardiomyocytes,Dermis,Endothelial cells not otherwise specified,Epidermis,Fibroblasts,Granulosa cells,Heart,Keratinocytes,Kidney,Langerhans cells,Mammary Gland,Melanocytes,Microglia,Other Cells,Other Epithelial cells,Other Nervous System,Other Neurons,Other Organ Systems,Ovary,Prostate Gland,Retina,Skeletal Muscle,Skin,Smooth Muscle,Smooth muscle cells not otherwise specified,Stromal c…
hsa-miR-942	miR-12202-3p (and other miRNAs w/seed CUUCUCU)	TargetScan Mouse	High (predicted)	DDO	D-aspartate oxidase	Cancer,Dermatological Diseases and Conditions,Gastrointestinal Disease,Hepatic System Disease,Infectious Disease,Nutritional Disease,Organismal Injury and Abnormalities,Reproductive System Disease	Cytoplasm	enzyme		Human,Mouse,Rat	Adipocytes,Adipose,Amygdala,Astrocytes,B lymphocytes not otherwise specified,BDCA-1+ dendritic cells,Cardiomyocytes,Cerebellum,Cerebral Cortex,Crypt,Cytotoxic T cells,Dendritic cells not otherwise specified,Dorsal Root Ganglion,Endothelial cells not otherwise specified,Epidermis,Fibroblasts,Granulosa cells,Heart,Hepatocytes,Hippocampus,Hypothalamus,Immature monocyte-derived dendritic cells,Kidney…
hsa-miR-942	miR-12202-3p (and other miRNAs w/seed CUUCUCU)	TargetScan Mouse	High (predicted)	DENND2A	DENN domain containing 2A	Cancer,Dermatological Diseases and Conditions,Endocrine System Disorders,Gastrointestinal Disease,Hepatic System Disease,Neurological Disease,Organismal Injury and Abnormalities,Reproductive System Disease,Respiratory Disease	Cytoplasm	other		Human,Mouse,Rat	Activated Vd1 Gamma-delta T cells,Adipocytes,Adipose,Amygdala,Astrocytes,B lymphocytes not otherwise specified,Bladder,Cardiomyocytes,Cerebellum,Cerebral Cortex,Crypt,Dendritic cells not otherwise specified,Dermis,Dorsal Root Ganglion,Endothelial cells not otherwise specified,Epidermis,Fibroblasts,Granulocytes not otherwise specified,Granulosa cells,Heart,Hepatocytes,Hippocampus,Hypothalamus,Kera…
hsa-miR-942	miR-12202-3p (and other miRNAs w/seed CUUCUCU)	TargetScan Human	High (predicted)	DEPDC4	DEP domain containing 4	Cancer,Endocrine System Disorders,Neurological Disease,Organismal Injury and Abnormalities,Renal and Urological Disease	Other	other		Human	Adipocytes,Adipose,Astrocytes,B lymphocytes not otherwise specified,Cardiomyocytes,Crypt,Dendritic cells not otherwise specified,Dermis,Endothelial cells not otherwise specified,Epidermis,Fibroblasts,Granulosa cells,Heart,Hematopoietic progenitor cells,Hepatocytes,Keratinocytes,Kidney,Langerhans cells,Liver,Lung,Macrophages not otherwise specified,Mammary Gland,Melanocytes,Microglia,Monocytes not…
hsa-miR-942	miR-12202-3p (and other miRNAs w/seed CUUCUCU)	TargetScan Human	High (predicted)	DIAPH2	diaphanous related formin 2	Cancer,Cardiovascular Disease,Connective Tissue Disorders,Dermatological Diseases and Conditions,Endocrine System Disorders,Gastrointestinal Disease,Hematological Disease,Hepatic System Disease,Hereditary Disorder,Immunological Disease,Inflammatory Disease,Neurological Disease,Organismal Injury and Abnormalities,Renal and Urological Disease,Reproductive System Disease,Respiratory Disease,Skeletal…	Cytoplasm	other	Actin Cytoskeleton Signaling,Cardiac Hypertrophy Signaling (Enhanced)	Human	Activated CD56dim NK cells,Activated Vd1 Gamma-delta T cells,Activated Vd2 Gamma-delta T cells,Adipocytes,Adipose,Astrocytes,B lymphocytes not otherwise specified,BDCA-1+ dendritic cells,BDCA-3+ dendritic cells,Brain,Cardiomyocytes,CD56bright NK cells,CD56dim NK cells,Central memory cytotoxic T cells,Central memory helper T cells,Crypt,Cytotoxic T cells,Dendritic cells not otherwise specified,Der…
hsa-miR-942	miR-12202-3p (and other miRNAs w/seed CUUCUCU)	TargetScan Human	High (predicted)	DMAC1	distal membrane arm assembly component 1	Cancer,Dermatological Diseases and Conditions,Endocrine System Disorders,Organismal Injury and Abnormalities	Cytoplasm	other		Human,Mouse,Rat	Activated helper T cells,Adipocytes,Adipose,Amygdala,B lymphocytes not otherwise specified,BDCA-1+ dendritic cells,BDCA-3+ dendritic cells,Bladder,Central memory cytotoxic T cells,Cerebellum,Cerebral Cortex,Cytotoxic T cells,Dendritic cells not otherwise specified,Dorsal Root Ganglion,Effector memory cytotoxic T cells,Effector memory RA+ cytotoxic T cells,Effector T cells,Endothelial cells not ot…
hsa-miR-942	miR-12202-3p (and other miRNAs w/seed CUUCUCU)	TargetScan Human	High (predicted)	DST	dystonin	Cancer,Connective Tissue Disorders,Dermatological Diseases and Conditions,Developmental Disorder,Endocrine System Disorders,Gastrointestinal Disease,Hematological Disease,Hepatic System Disease,Hereditary Disorder,Immunological Disease,Metabolic Disease,Neurological Disease,Organismal Injury and Abnormalities,Psychological Disorders,Renal and Urological Disease,Reproductive System Disease,Respira…	Plasma Membrane	other		Human	Adipocytes,Adipose,Astrocytes,B lymphocytes not otherwise specified,BDCA-1+ dendritic cells,BDCA-3+ dendritic cells,Cardiomyocytes,Crypt,Dendritic cells not otherwise specified,Dermis,Dorsal Root Ganglion,Endothelial cells not otherwise specified,Epidermis,Fibroblasts,Granulocytes not otherwise specified,Granulosa cells,Heart,Hematopoietic progenitor cells,Hepatocytes,Keratinocytes,Kidney,Langerh…
hsa-miR-942	miR-12202-3p (and other miRNAs w/seed CUUCUCU)	TargetScan Mouse	High (predicted)	DUSP22	dual specificity phosphatase 22	Cancer,Cardiovascular Disease,Dermatological Diseases and Conditions,Gastrointestinal Disease,Hematological Disease,Hepatic System Disease,Immunological Disease,Inflammatory Disease,Inflammatory Response,Neurological Disease,Organismal Injury and Abnormalities,Renal and Urological Disease,Reproductive System Disease,Respiratory Disease	Cytoplasm	phosphatase	Protein Kinase A Signaling	Human,Mouse,Rat	Activated CD56bright NK cells,Activated CD56dim NK cells,Activated helper T cells,Activated Vd1 Gamma-delta T cells,Activated Vd2 Gamma-delta T cells,Adipocytes,Adipose,Amygdala,Astrocytes,B lymphocytes not otherwise specified,BDCA-1+ dendritic cells,BDCA-3+ dendritic cells,Bladder,Brain,Cardiomyocytes,CD56dim NK cells,Central memory cytotoxic T cells,Central memory helper T cells,Cerebellum,Cryp…
hsa-miR-942	miR-12202-3p (and other miRNAs w/seed CUUCUCU)	TargetScan Mouse,TargetScan Human	High (predicted),Moderate (predicted)	EIF4E3	eukaryotic translation initiation factor 4E family member 3	Cancer,Connective Tissue Disorders,Dermatological Diseases and Conditions,Endocrine System Disorders,Gastrointestinal Disease,Hematological Disease,Hepatic System Disease,Immunological Disease,Infectious Disease,Inflammatory Disease,Inflammatory Response,Neurological Disease,Organismal Injury and Abnormalities,Respiratory Disease	Cytoplasm	translation regulator		Human,Mouse,Rat	Activated helper T cells,Adipocytes,Adipose,Astrocytes,B lymphocytes not otherwise specified,BDCA-1+ dendritic cells,BDCA-3+ dendritic cells,Cardiomyocytes,Central memory cytotoxic T cells,Crypt,Dendritic cells not otherwise specified,Dermis,Effector memory cytotoxic T cells,Effector memory RA+ cytotoxic T cells,Endothelial cells not otherwise specified,Epidermis,Fibroblasts,Granulocytes not othe…
hsa-miR-942	miR-12202-3p (and other miRNAs w/seed CUUCUCU)	TargetScan Mouse,TargetScan Human	High (predicted),Moderate (predicted)	EMP2	epithelial membrane protein 2	Cancer,Endocrine System Disorders,Hematological Disease,Hereditary Disorder,Immunological Disease,Organismal Injury and Abnormalities,Renal and Urological Disease,Tumor Morphology	Plasma Membrane	other		Human,Mouse,Rat	Adipocytes,Adipose,Astrocytes,B lymphocytes not otherwise specified,Bladder,Cardiomyocytes,Crypt,Dendritic cells not otherwise specified,Dermis,Dorsal Root Ganglion,Endothelial cells not otherwise specified,Epidermis,Fibroblasts,Granulocytes not otherwise specified,Granulosa cells,Heart,Hepatocytes,Keratinocytes,Kidney,Langerhans cells,Liver,Lung,Macrophages not otherwise specified,Mammary Gland,…
hsa-miR-942	miR-12202-3p (and other miRNAs w/seed CUUCUCU)	TargetScan Mouse	High (predicted)	ERICH3	glutamate rich 3	Cancer,Dermatological Diseases and Conditions,Endocrine System Disorders,Gastrointestinal Disease,Hepatic System Disease,Organismal Injury and Abnormalities,Reproductive System Disease,Respiratory Disease	Other	other		Human,Mouse,Rat	Astrocytes,B lymphocytes not otherwise specified,Cardiomyocytes,Dendritic cells not otherwise specified,Endothelial cells not otherwise specified,Fibroblasts,Granulocytes not otherwise specified,Heart,Hepatocytes,Hypothalamus,Immature monocyte-derived dendritic cells,Liver,Lung,Macrophages not otherwise specified,Mammary Gland,Mature monocyte-derived dendritic cells,Microglia,NK cells not otherwi…
hsa-miR-942	miR-12202-3p (and other miRNAs w/seed CUUCUCU)	TargetScan Mouse	High (predicted)	ERLIN1	ER lipid raft associated 1	Cancer,Dermatological Diseases and Conditions,Gastrointestinal Disease,Hereditary Disorder,Neurological Disease,Organismal Injury and Abnormalities,Psychological Disorders,Reproductive System Disease,Skeletal and Muscular Disorders	Plasma Membrane	other		Human,Mouse,Rat	Activated helper T cells,Activated Vd1 Gamma-delta T cells,Activated Vd2 Gamma-delta T cells,Adipocytes,Adipose,Amygdala,Astrocytes,B lymphocytes not otherwise specified,BDCA-1+ dendritic cells,BDCA-3+ dendritic cells,Bladder,Cardiomyocytes,Cerebellum,Cerebral Cortex,Crypt,Cytotoxic T cells,Dendritic cells not otherwise specified,Dermis,Dorsal Root Ganglion,Effector memory cytotoxic T cells,Effec…
hsa-miR-942	miR-12202-3p (and other miRNAs w/seed CUUCUCU)	TargetScan Mouse	High (predicted)	ERMARD	ER membrane associated RNA degradation	Cancer,Dermatological Diseases and Conditions,Developmental Disorder,Endocrine System Disorders,Hematological Disease,Hereditary Disorder,Immunological Disease,Neurological Disease,Organismal Injury and Abnormalities	Other	other		Human,Mouse,Rat	Activated helper T cells,Adipocytes,Adipose,Astrocytes,B lymphocytes not otherwise specified,BDCA-1+ dendritic cells,BDCA-3+ dendritic cells,Cardiomyocytes,Central memory cytotoxic T cells,Crypt,Dendritic cells not otherwise specified,Dermis,Effector memory cytotoxic T cells,Effector memory RA+ cytotoxic T cells,Endothelial cells not otherwise specified,Epidermis,Fibroblasts,Granulocytes not othe…
hsa-miR-942	miR-12202-3p (and other miRNAs w/seed CUUCUCU)	TargetScan Human	High (predicted)	ETFRF1	electron transfer flavoprotein regulatory factor 1	Cancer,Gastrointestinal Disease,Neurological Disease,Organismal Injury and Abnormalities,Psychological Disorders	Cytoplasm	other		Human,Mouse,Rat	Activated helper T cells,Adipocytes,Adipose,Amygdala,B lymphocytes not otherwise specified,BDCA-1+ dendritic cells,BDCA-3+ dendritic cells,Central memory cytotoxic T cells,Dendritic cells not otherwise specified,Dorsal Root Ganglion,Effector memory cytotoxic T cells,Effector memory RA+ cytotoxic T cells,Effector T cells,Endothelial cells not otherwise specified,Fibroblasts,Granulocytes not otherw…
hsa-miR-942	miR-12202-3p (and other miRNAs w/seed CUUCUCU)	TargetScan Human	High (predicted)	EVC	EvC ciliary complex subunit 1	Cancer,Connective Tissue Disorders,Dental Disease,Dermatological Diseases and Conditions,Developmental Disorder,Endocrine System Disorders,Gastrointestinal Disease,Hematological Disease,Hereditary Disorder,Immunological Disease,Inflammatory Disease,Inflammatory Response,Neurological Disease,Organismal Injury and Abnormalities,Renal and Urological Disease,Reproductive System Disease,Skeletal and M…	Cytoplasm	other		Human,Mouse,Rat	Adipocytes,Adipose,Astrocytes,B lymphocytes not otherwise specified,Cardiomyocytes,Dermis,Endothelial cells not otherwise specified,Epidermis,Fibroblasts,Granulosa cells,Heart,Hematopoietic progenitor cells,Hepatocytes,Keratinocytes,Kidney,Langerhans cells,Liver,Lung,Macrophages not otherwise specified,Mammary Gland,Melanocytes,Microglia,Other Cells,Other Epithelial cells,Other Nervous System,Oth…
hsa-miR-942	miR-12202-3p (and other miRNAs w/seed CUUCUCU)	TargetScan Mouse	High (predicted)	F13A1	coagulation factor XIII A chain	Cancer,Cardiovascular Disease,Connective Tissue Disorders,Dermatological Diseases and Conditions,Developmental Disorder,Endocrine System Disorders,Gastrointestinal Disease,Hematological Disease,Hereditary Disorder,Immunological Disease,Infectious Disease,Inflammatory Disease,Inflammatory Response,Neurological Disease,Nutritional Disease,Organismal Injury and Abnormalities,Reproductive System Dise…	Extracellular Space	enzyme	Coagulation System,Extrinsic Prothrombin Activation Pathway,Intrinsic Prothrombin Activation Pathway,Serotonin Receptor Signaling	Human,Mouse,Rat	Activated Vd1 Gamma-delta T cells,Adipocytes,Adipose,Astrocytes,B lymphocytes not otherwise specified,BDCA-1+ dendritic cells,BDCA-3+ dendritic cells,Bladder,Cardiomyocytes,Cerebral Cortex,Cytotoxic T cells,Dendritic cells not otherwise specified,Dermis,Dorsal Root Ganglion,Endothelial cells not otherwise specified,Epidermis,Fibroblasts,Granulocytes not otherwise specified,Heart,Hematopoietic pro…
hsa-miR-942	miR-12202-3p (and other miRNAs w/seed CUUCUCU)	TargetScan Human	High (predicted)	FAHD1	fumarylacetoacetate hydrolase domain containing 1	Cancer,Gastrointestinal Disease,Metabolic Disease,Organismal Injury and Abnormalities,Reproductive System Disease	Cytoplasm	enzyme		Human,Mouse,Rat	Adipocytes,Adipose,Amygdala,Astrocytes,B lymphocytes not otherwise specified,Bladder,Cardiomyocytes,Cerebellum,Cerebral Cortex,Crypt,Dendritic cells not otherwise specified,Dermis,Dorsal Root Ganglion,Endothelial cells not otherwise specified,Epidermis,Fibroblasts,Granulocytes not otherwise specified,Granulosa cells,Heart,Hematopoietic progenitor cells,Hepatocytes,Hypothalamus,Keratinocytes,Kidne…
hsa-miR-942	miR-12202-3p (and other miRNAs w/seed CUUCUCU)	TargetScan Mouse	High (predicted)	FAM124A	family with sequence similarity 124 member A	Cancer,Endocrine System Disorders,Gastrointestinal Disease,Neurological Disease,Organismal Injury and Abnormalities,Reproductive System Disease	Other	other		Human,Mouse,Rat	Adipocytes,Adipose,Astrocytes,B lymphocytes not otherwise specified,Cardiomyocytes,Dendritic cells not otherwise specified,Dermis,Endothelial cells not otherwise specified,Epidermis,Fibroblasts,Granulocytes not otherwise specified,Granulosa cells,Heart,Hepatocytes,Keratinocytes,Kidney,Langerhans cells,Liver,Macrophages not otherwise specified,Mammary Gland,Mature monocyte-derived dendritic cells,…
hsa-miR-942	miR-12202-3p (and other miRNAs w/seed CUUCUCU)	TargetScan Human	High (predicted)	FAM221B	family with sequence similarity 221 member B	Cancer,Dermatological Diseases and Conditions,Endocrine System Disorders,Gastrointestinal Disease,Neurological Disease,Organismal Injury and Abnormalities,Reproductive System Disease,Respiratory Disease	Other	other		Human,Mouse,Rat	Adipose,Amygdala,Astrocytes,B lymphocytes not otherwise specified,BDCA-1+ dendritic cells,Bladder,Cardiomyocytes,Cerebellum,Crypt,Cytotoxic T cells,Dendritic cells not otherwise specified,Dorsal Root Ganglion,Effector T cells,Endothelial cells not otherwise specified,Epidermis,Fibroblasts,Granulosa cells,Heart,Hepatocytes,Hippocampus,Kidney,Large Intestine,Liver,Lung,Macrophages not otherwise spe…
hsa-miR-942	miR-12202-3p (and other miRNAs w/seed CUUCUCU)	TargetScan Mouse	High (predicted)	Fam240b	family with sequence similarity 240 member B		Other	other		Mouse
hsa-miR-942	miR-12202-3p (and other miRNAs w/seed CUUCUCU)	TargetScan Mouse	High (predicted)	FAM47E	family with sequence similarity 47 member E	Cancer,Dermatological Diseases and Conditions,Endocrine System Disorders,Gastrointestinal Disease,Hepatic System Disease,Neurological Disease,Organismal Injury and Abnormalities,Reproductive System Disease	Cytoplasm	other		Human,Mouse,Rat	Adipocytes,Adipose,Astrocytes,B lymphocytes not otherwise specified,Cardiomyocytes,Crypt,Dendritic cells not otherwise specified,Dermis,Endothelial cells not otherwise specified,Epidermis,Fibroblasts,Granulosa cells,Heart,Hematopoietic progenitor cells,Hepatocytes,Keratinocytes,Kidney,Liver,Lung,Macrophages not otherwise specified,Mammary Gland,Melanocytes,Microglia,Other Cells,Other Epithelial c…
hsa-miR-942	miR-12202-3p (and other miRNAs w/seed CUUCUCU)	TargetScan Mouse	High (predicted)	FAM81A	family with sequence similarity 81 member A	Cancer,Dermatological Diseases and Conditions,Endocrine System Disorders,Hematological Disease,Immunological Disease,Neurological Disease,Organismal Injury and Abnormalities	Plasma Membrane	other		Human,Mouse,Rat	Adipocytes,Adipose,Amygdala,Astrocytes,B lymphocytes not otherwise specified,BDCA-1+ dendritic cells,Cardiomyocytes,Cerebral Cortex,Crypt,Dermis,Endothelial cells not otherwise specified,Epidermis,Fibroblasts,Granulocytes not otherwise specified,Granulosa cells,Heart,Hematopoietic progenitor cells,Hepatocytes,Keratinocytes,Kidney,Langerhans cells,Liver,Lung,Macrophages not otherwise specified,Mam…
hsa-miR-942	miR-12202-3p (and other miRNAs w/seed CUUCUCU)	TargetScan Mouse	High (predicted)	FAM90A1	family with sequence similarity 90 member A1	Cancer,Dermatological Diseases and Conditions,Endocrine System Disorders,Gastrointestinal Disease,Hematological Disease,Hepatic System Disease,Immunological Disease,Neurological Disease,Organismal Injury and Abnormalities,Renal and Urological Disease,Reproductive System Disease,Respiratory Disease	Other	other		Human,Mouse	Adipocytes,Adipose,Astrocytes,B lymphocytes not otherwise specified,Crypt,Dermis,Endothelial cells not otherwise specified,Epidermis,Fibroblasts,Granulosa cells,Hematopoietic progenitor cells,Keratinocytes,Kidney,Liver,Macrophages not otherwise specified,Mammary Gland,Monocytes not otherwise specified,Other Cells,Other Epithelial cells,Other Nervous System,Other Neurons,Other Organ Systems,Ovary,…
hsa-miR-942	miR-12202-3p (and other miRNAs w/seed CUUCUCU)	TargetScan Human	High (predicted)	FCRL4	Fc receptor like 4	Cancer,Dermatological Diseases and Conditions,Endocrine System Disorders,Gastrointestinal Disease,Hematological Disease,Hepatic System Disease,Immunological Disease,Organismal Injury and Abnormalities,Renal and Urological Disease,Respiratory Disease	Cytoplasm	other		Human	B lymphocytes not otherwise specified,Cardiomyocytes,Heart,Lymph node,Memory B cells,Naive B cells,Other Nervous System,Other Neurons,Other Tissues and Primary Cells,Pancreas,Plasma cells,Smooth Muscle,Smooth muscle cells not otherwise specified,Spleen,T lymphocytes not otherwise specified,Other Cell Line,Other Lymphoma Cell Lines
hsa-miR-942	miR-12202-3p (and other miRNAs w/seed CUUCUCU)	TargetScan Human	High (predicted)	FGF1	fibroblast growth factor 1	Cancer,Cardiovascular Disease,Connective Tissue Disorders,Dermatological Diseases and Conditions,Developmental Disorder,Endocrine System Disorders,Gastrointestinal Disease,Hepatic System Disease,Hereditary Disorder,Inflammatory Disease,Inflammatory Response,Metabolic Disease,Neurological Disease,Organismal Injury and Abnormalities,Renal and Urological Disease,Reproductive System Disease,Skeletal …	Extracellular Space	growth factor	Actin Cytoskeleton Signaling,Adipogenesis pathway,Airway Pathology in Chronic Obstructive Pulmonary Disease,Bladder Cancer Signaling,Cardiac Hypertrophy Signaling (Enhanced),Clathrin-mediated Endocytosis Signaling,Ephrin Receptor Signaling,Epithelial Adherens Junction Signaling,FGF Signaling,Hepatic Fibrosis / Hepatic Stellate Cell Activation,Regulation Of The Epithelial Mesenchymal Transition By…	Human,Mouse,Rat	Adipocytes,Adipose,Astrocytes,B lymphocytes not otherwise specified,Brain,Cardiomyocytes,Cerebellum,Cerebral Cortex,Cornea,Dendritic cells not otherwise specified,Dermis,Dorsal Root Ganglion,Endothelial cells not otherwise specified,Epithelial cells not otherwise specified,Fibroblasts,Heart,Hypothalamus,Keratinocytes,Kidney,Lens,Liver,Lung,Macrophages not otherwise specified,Mammary Gland,Melanoc…
hsa-miR-942	miR-12202-3p (and other miRNAs w/seed CUUCUCU)	TargetScan Mouse	High (predicted)	FMN1	formin 1	Cancer,Connective Tissue Disorders,Dermatological Diseases and Conditions,Developmental Disorder,Endocrine System Disorders,Gastrointestinal Disease,Hematological Disease,Hepatic System Disease,Hereditary Disorder,Immunological Disease,Neurological Disease,Organismal Injury and Abnormalities,Renal and Urological Disease,Reproductive System Disease,Respiratory Disease,Skeletal and Muscular Disorde…	Nucleus	other		Human,Mouse,Rat	Adipocytes,Adipose,Astrocytes,B lymphocytes not otherwise specified,Cardiomyocytes,Cerebral Cortex,Crypt,Dendritic cells not otherwise specified,Dermis,Endothelial cells not otherwise specified,Epidermis,Fibroblasts,Granulocytes not otherwise specified,Granulosa cells,Heart,Hematopoietic progenitor cells,Hepatocytes,Hippocampus,Keratinocytes,Kidney,Langerhans cells,Liver,Lung,Macrophages not othe…
hsa-miR-942	miR-12202-3p (and other miRNAs w/seed CUUCUCU)	TargetScan Mouse	High (predicted)	FTMT	ferritin mitochondrial	Cancer,Dermatological Diseases and Conditions,Endocrine System Disorders,Gastrointestinal Disease,Hepatic System Disease,Neurological Disease,Organismal Injury and Abnormalities,Reproductive System Disease,Respiratory Disease	Cytoplasm	enzyme	Ferroptosis Signaling Pathway	Human,Mouse,Rat	Brain,Cardiomyocytes,Endothelial cells not otherwise specified,Heart,Kidney,Macrophages not otherwise specified,Mammary Gland,Other Organ Systems,Smooth Muscle,Testis,786-0,CAKI-1,HCC-2998,HOP-92,NCI-H522,RPMI-8266,U251
hsa-miR-942	miR-12202-3p (and other miRNAs w/seed CUUCUCU)	TargetScan Mouse	High (predicted)	G0S2	G0/G1 switch 2	Cancer,Cardiovascular Disease,Connective Tissue Disorders,Dermatological Diseases and Conditions,Developmental Disorder,Endocrine System Disorders,Gastrointestinal Disease,Hereditary Disorder,Immunological Disease,Inflammatory Disease,Inflammatory Response,Metabolic Disease,Nutritional Disease,Organismal Injury and Abnormalities,Reproductive System Disease,Skeletal and Muscular Disorders	Cytoplasm	other		Human,Mouse,Rat	Adipocytes,Adipose,Astrocytes,B lymphocytes not otherwise specified,Cardiomyocytes,Crypt,Dendritic cells not otherwise specified,Dermis,Endothelial cells not otherwise specified,Epidermis,Fibroblasts,Granulocytes not otherwise specified,Granulosa cells,Heart,Hematopoietic progenitor cells,Hepatocytes,Keratinocytes,Kidney,Langerhans cells,Liver,Lung,Macrophages not otherwise specified,Mammary Glan…
hsa-miR-942	miR-12202-3p (and other miRNAs w/seed CUUCUCU)	TargetScan Mouse	High (predicted)	Gar1	GAR1 ribonucleoprotein		Nucleus	other		Mouse,Rat	Adipose,Amygdala,B lymphocytes not otherwise specified,Bladder,Cerebellum,Cerebral Cortex,Cytotoxic T cells,Dorsal Root Ganglion,Effector T cells,Epidermis,Heart,Hippocampus,Hypothalamus,Kidney,Large Intestine,Liver,Lung,Mammary Gland,Murine NKT cells,Olfactory Bulb,Ovary,Pituitary Gland,Placenta,Prostate Gland,Retina,Salivary Gland,Skeletal Muscle,Small Intestine,Spleen,Stomach,Substantia Nigra,…
hsa-miR-942	miR-12202-3p (and other miRNAs w/seed CUUCUCU)	TargetScan Mouse	High (predicted)	GDF5	growth differentiation factor 5	Cancer,Connective Tissue Disorders,Dermatological Diseases and Conditions,Developmental Disorder,Gastrointestinal Disease,Hematological Disease,Hepatic System Disease,Hereditary Disorder,Inflammatory Disease,Inflammatory Response,Metabolic Disease,Neurological Disease,Organismal Injury and Abnormalities,Reproductive System Disease,Respiratory Disease,Skeletal and Muscular Disorders	Extracellular Space	growth factor	Osteoarthritis Pathway	Human,Mouse,Rat	Adipocytes,Adipose,Amygdala,B lymphocytes not otherwise specified,Bladder,Cardiomyocytes,Cerebellum,Cerebral Cortex,Cytotoxic T cells,Dorsal Root Ganglion,Effector T cells,Endothelial cells not otherwise specified,Epidermis,Fibroblasts,Granulocytes not otherwise specified,Heart,Hippocampus,Hypothalamus,Kidney,Large Intestine,Liver,Lung,Mammary Gland,Olfactory Bulb,Other Cells,Other Epithelial cel…
hsa-miR-942	miR-12202-3p (and other miRNAs w/seed CUUCUCU)	TargetScan Mouse,TargetScan Human	High (predicted),Moderate (predicted)	GDNF	glial cell derived neurotrophic factor	Cancer,Cardiovascular Disease,Dermatological Diseases and Conditions,Developmental Disorder,Endocrine System Disorders,Gastrointestinal Disease,Hematological Disease,Hereditary Disorder,Inflammatory Disease,Inflammatory Response,Metabolic Disease,Neurological Disease,Nutritional Disease,Organismal Injury and Abnormalities,Psychological Disorders,Renal and Urological Disease,Reproductive System Di…	Extracellular Space	growth factor	Amyotrophic Lateral Sclerosis Signaling,GDNF Family Ligand-Receptor Interactions,Neuroinflammation Signaling Pathway,PEDF Signaling,Thyroid Cancer Signaling	Human,Mouse,Rat	Adrenal Gland,Amygdala,Astrocytes,Brain,Cardiomyocytes,Caudate Nucleus,Cerebellum,Cerebral Cortex,Cortical neurons,Dermis,Dorsal Root Ganglion,Endothelial cells not otherwise specified,Epidermis,Fibroblasts,Granulosa cells,Heart,Hippocampus,Keratinocytes,Kidney,Large Intestine,Lung,Lymph node,Macrophages not otherwise specified,Mammary Gland,Mesenchymal stem cells,Microglia,Neurons not otherwise …
hsa-miR-942	miR-12202-3p (and other miRNAs w/seed CUUCUCU)	TargetScan Mouse	High (predicted)	Gm10175/Gm10231	ATP synthase, H+ transporting, mitochondrial F0 complex, subunit C2 (subunit 9) pseudogene		Other	other		Mouse
hsa-miR-942	miR-12202-3p (and other miRNAs w/seed CUUCUCU)	TargetScan Mouse	High (predicted)	Gm10684	predicted gene 10684		Other	other		Mouse
hsa-miR-942	miR-12202-3p (and other miRNAs w/seed CUUCUCU)	TargetScan Mouse	High (predicted)	Gm14288 (includes others)	predicted gene 14288		Other	other		Mouse,Rat	Adipose,Amygdala,Bladder,Cerebral Cortex,Cytotoxic T cells,Dorsal Root Ganglion,Effector T cells,Epidermis,Heart,Hippocampus,Hypothalamus,Kidney,Liver,Lung,Mammary Gland,Olfactory Bulb,Ovary,Pituitary Gland,Placenta,Prostate Gland,Retina,Skeletal Muscle,Stomach,Substantia Nigra,Thymus,J774
hsa-miR-942	miR-12202-3p (and other miRNAs w/seed CUUCUCU)	TargetScan Mouse	High (predicted),Moderate (predicted)	Gm14419 (includes others)	predicted gene 14419		Nucleus	other		Mouse	Adipose,Amygdala,B lymphocytes not otherwise specified,Bladder,Cerebellum,Cytotoxic T cells,Dorsal Root Ganglion,Effector T cells,Epidermis,Heart,Hippocampus,Hypothalamus,Kidney,Large Intestine,Lung,Mammary Gland,Olfactory Bulb,Ovary,Pituitary Gland,Placenta,Prostate Gland,Retina,Salivary Gland,Skeletal Muscle,Spleen,Stomach,Substantia Nigra,Testis,Thymus,Uterus,J774,RAW 264.7
hsa-miR-942	miR-12202-3p (and other miRNAs w/seed CUUCUCU)	TargetScan Mouse	High (predicted)	Gm15737	predicted gene 15737		Other	other		Mouse
hsa-miR-942	miR-12202-3p (and other miRNAs w/seed CUUCUCU)	TargetScan Mouse	High (predicted)	Gm20708			Other	other		Mouse
hsa-miR-942	miR-12202-3p (and other miRNAs w/seed CUUCUCU)	TargetScan Mouse	High (predicted)	Gm3604/Gm5141	predicted gene 5141		Other	other		Mouse
hsa-miR-942	miR-12202-3p (and other miRNAs w/seed CUUCUCU)	TargetScan Human	High (predicted)	GOLGA6L6 (includes others)	golgin A6 family like 6	Cancer,Dermatological Diseases and Conditions,Endocrine System Disorders,Gastrointestinal Disease,Hematological Disease,Hepatic System Disease,Immunological Disease,Organismal Injury and Abnormalities,Reproductive System Disease,Respiratory Disease,Skeletal and Muscular Disorders	Other	other		Human	B lymphocytes not otherwise specified,Cardiomyocytes,Heart,Hepatocytes,Liver,Lung,Macrophages not otherwise specified,Monocyte-derived macrophage,Other Cells,Other Epithelial cells,Other Nervous System,Other Organ Systems,Testis
hsa-miR-942	miR-12202-3p (and other miRNAs w/seed CUUCUCU)	TargetScan Human	High (predicted)	GOLGB1	golgin B1	Cancer,Dermatological Diseases and Conditions,Endocrine System Disorders,Gastrointestinal Disease,Hepatic System Disease,Neurological Disease,Organismal Injury and Abnormalities,Renal and Urological Disease,Reproductive System Disease,Respiratory Disease	Cytoplasm	other		Human,Mouse,Rat	Activated CD56bright NK cells,Activated helper T cells,Activated Vd1 Gamma-delta T cells,Activated Vd2 Gamma-delta T cells,Adipocytes,Adipose,Astrocytes,B lymphocytes not otherwise specified,BDCA-1+ dendritic cells,BDCA-3+ dendritic cells,Cardiomyocytes,Central memory cytotoxic T cells,Central memory helper T cells,Crypt,Cytotoxic T cells,Dendritic cells not otherwise specified,Dermis,Effector me…
hsa-miR-942	miR-12202-3p (and other miRNAs w/seed CUUCUCU)	TargetScan Human	High (predicted)	GPR139	G protein-coupled receptor 139	Cancer,Dermatological Diseases and Conditions,Endocrine System Disorders,Gastrointestinal Disease,Hereditary Disorder,Neurological Disease,Organismal Injury and Abnormalities,Psychological Disorders,Reproductive System Disease,Skeletal and Muscular Disorders	Plasma Membrane	G-protein coupled receptor	Breast Cancer Regulation by Stathmin1,CREB Signaling in Neurons,FAK Signaling,G-Protein Coupled Receptor Signaling,Phagosome Formation,S100 Family Signaling Pathway	Human,Mouse,Rat	Astrocytes,Cardiomyocytes,Heart,Other Cells,Other Nervous System,Other Neurons,Trigeminal Ganglion
hsa-miR-942	miR-12202-3p (and other miRNAs w/seed CUUCUCU)	TargetScan Mouse	High (predicted)	GPR15	G protein-coupled receptor 15	Cancer,Connective Tissue Disorders,Hematological Disease,Hereditary Disorder,Immunological Disease,Infectious Disease,Inflammatory Disease,Inflammatory Response,Neurological Disease,Organismal Injury and Abnormalities,Skeletal and Muscular Disorders	Plasma Membrane	G-protein coupled receptor	Breast Cancer Regulation by Stathmin1,CREB Signaling in Neurons,FAK Signaling,G-Protein Coupled Receptor Signaling,Phagosome Formation,S100 Family Signaling Pathway	Human,Mouse,Rat	Activated Vd1 Gamma-delta T cells,B lymphocytes not otherwise specified,Brain,Cardiomyocytes,Central memory cytotoxic T cells,Crypt,Endothelial cells not otherwise specified,Epithelial cells not otherwise specified,Fibroblasts,Heart,Large Intestine,Lung,Monocytes not otherwise specified,Mononuclear leukocytes not otherwise specified,Other Cells,Other Epithelial cells,Other Nervous System,Other Ne…
hsa-miR-942	miR-12202-3p (and other miRNAs w/seed CUUCUCU)	TargetScan Human	High (predicted)	GPR26	G protein-coupled receptor 26	Cancer,Endocrine System Disorders,Gastrointestinal Disease,Hereditary Disorder,Neurological Disease,Organismal Injury and Abnormalities,Psychological Disorders,Reproductive System Disease,Skeletal and Muscular Disorders	Plasma Membrane	G-protein coupled receptor	Breast Cancer Regulation by Stathmin1,CREB Signaling in Neurons,FAK Signaling,G-Protein Coupled Receptor Signaling,Phagosome Formation,S100 Family Signaling Pathway	Human,Mouse,Rat	Amygdala,Cardiomyocytes,Cerebellum,Dorsal Root Ganglion,Epidermis,Heart,Microglia,Other Cells,Other Nervous System,Other Neurons,Placenta,Retina,Salivary Gland,Testis,Uterus
hsa-miR-942	miR-12202-3p (and other miRNAs w/seed CUUCUCU)	TargetScan Human	High (predicted)	GREM1	gremlin 1, DAN family BMP antagonist	Cancer,Cardiovascular Disease,Endocrine System Disorders,Gastrointestinal Disease,Hematological Disease,Hepatic System Disease,Hereditary Disorder,Inflammatory Response,Metabolic Disease,Organismal Injury and Abnormalities,Renal and Urological Disease,Reproductive System Disease,Respiratory Disease,Tumor Morphology	Extracellular Space	other	BMP signaling pathway,Osteoarthritis Pathway	Human,Mouse,Rat	Adipocytes,Adipose,Amygdala,Astrocytes,B lymphocytes not otherwise specified,Bladder,Brain,Calvaria,Cardiomyocytes,Cerebellum,Cerebral Cortex,Crypt,Cytotoxic T cells,Dendritic cells not otherwise specified,Dermis,Dorsal Root Ganglion,Effector T cells,Endothelial cells not otherwise specified,Epidermis,Fibroblasts,Granulosa cells,Heart,Hepatocytes,Hippocampus,Hypothalamus,Keratinocytes,Kidney,Lang…
hsa-miR-942	miR-12202-3p (and other miRNAs w/seed CUUCUCU)	TargetScan Mouse,TargetScan Human	High (predicted),Moderate (predicted)	GRIN2B	glutamate ionotropic receptor NMDA type subunit 2B	Cancer,Cardiovascular Disease,Dermatological Diseases and Conditions,Developmental Disorder,Endocrine System Disorders,Gastrointestinal Disease,Hematological Disease,Hepatic System Disease,Hereditary Disorder,Immunological Disease,Infectious Disease,Inflammatory Disease,Inflammatory Response,Metabolic Disease,Neurological Disease,Nutritional Disease,Ophthalmic Disease,Organismal Injury and Abnorm…	Plasma Membrane	ion channel	Amyotrophic Lateral Sclerosis Signaling,Calcium Signaling,Circadian Rhythm Signaling,CREB Signaling in Neurons,Dopamine-DARPP32 Feedback in cAMP Signaling,Endocannabinoid Neuronal Synapse Pathway,Ephrin Receptor Signaling,Glutamate Receptor Signaling,Huntington's Disease Signaling,Multiple Sclerosis Signaling Pathway,Neuroinflammation Signaling Pathway,Neuropathic Pain Signaling In Dorsal Horn Ne…	Human,Mouse,Rat	Activated CD56bright NK cells,Adipocytes,Adipose,Amygdala,Astrocytes,Bone marrow-derived macrophages,Brain,Cardiomyocytes,CD56bright NK cells,CD56dim NK cells,Cerebellum,Cerebral Cortex,Crypt,Endothelial cells not otherwise specified,Fibroblasts,Heart,Hippocampus,Hypothalamus,Kidney,Mammary Gland,Microglia,Neurons not otherwise specified,Olfactory Bulb,Other Cells,Other Epithelial cells,Other Ner…
hsa-miR-942	miR-12202-3p (and other miRNAs w/seed CUUCUCU)	TargetScan Mouse	High (predicted)	GRK5	G protein-coupled receptor kinase 5	Cancer,Cardiovascular Disease,Dermatological Diseases and Conditions,Developmental Disorder,Endocrine System Disorders,Gastrointestinal Disease,Hereditary Disorder,Hypersensitivity Response,Infectious Disease,Inflammatory Disease,Inflammatory Response,Metabolic Disease,Neurological Disease,Organismal Injury and Abnormalities,Skeletal and Muscular Disorders	Plasma Membrane	kinase	G-Protein Coupled Receptor Signaling,Opioid Signaling Pathway,Pyridoxal 5'-phosphate Salvage Pathway,Salvage Pathways of Pyrimidine Ribonucleotides	Human,Mouse,Rat	Adipocytes,Adipose,Amygdala,Astrocytes,B lymphocytes not otherwise specified,Bladder,Brain,Cardiomyocytes,Crypt,Dendritic cells not otherwise specified,Dermis,Dorsal Root Ganglion,Effector memory cytotoxic T cells,Effector memory RA+ cytotoxic T cells,Endothelial cells not otherwise specified,Epidermis,Fibroblasts,Granulocytes not otherwise specified,Granulosa cells,Heart,Hepatocytes,Hypothalamus…
hsa-miR-942	miR-12202-3p (and other miRNAs w/seed CUUCUCU)	TargetScan Human	High (predicted)	GUCA1C	guanylate cyclase activator 1C	Cancer,Dermatological Diseases and Conditions,Endocrine System Disorders,Neurological Disease,Organismal Injury and Abnormalities,Reproductive System Disease,Respiratory Disease	Cytoplasm	other	Phototransduction Pathway	Human	Activated helper T cells,Astrocytes,Cardiomyocytes,Endothelial cells not otherwise specified,Fibroblasts,Heart,Kidney,Microglia,Naive helper T cells,Other Cells,Other Nervous System,Other Neurons,Ovary,Pancreas,Retina,Testis,Th1 cells
hsa-miR-942	miR-12202-3p (and other miRNAs w/seed CUUCUCU)	TargetScan Mouse,TargetScan Human	High (predicted),Moderate (predicted)	GXYLT1	glucoside xylosyltransferase 1	Cancer,Cardiovascular Disease,Dermatological Diseases and Conditions,Endocrine System Disorders,Gastrointestinal Disease,Hematological Disease,Hepatic System Disease,Immunological Disease,Neurological Disease,Organismal Injury and Abnormalities,Reproductive System Disease	Cytoplasm	enzyme		Human,Mouse,Rat	Adipocytes,Adipose,Amygdala,Astrocytes,B lymphocytes not otherwise specified,BDCA-1+ dendritic cells,BDCA-3+ dendritic cells,Bladder,Cardiomyocytes,Central memory cytotoxic T cells,Cerebellum,Cerebral Cortex,Crypt,Cytotoxic T cells,Dendritic cells not otherwise specified,Dermis,Dorsal Root Ganglion,Effector memory cytotoxic T cells,Effector memory RA+ cytotoxic T cells,Effector T cells,Endothelia…
hsa-miR-942	miR-12202-3p (and other miRNAs w/seed CUUCUCU)	TargetScan Mouse	High (predicted)	HACD1	3-hydroxyacyl-CoA dehydratase 1	Cancer,Cardiovascular Disease,Developmental Disorder,Endocrine System Disorders,Gastrointestinal Disease,Hepatic System Disease,Hereditary Disorder,Metabolic Disease,Neurological Disease,Organismal Injury and Abnormalities,Skeletal and Muscular Disorders	Cytoplasm	enzyme	Glutaryl-CoA Degradation,Tryptophan Degradation III (Eukaryotic)	Human,Mouse,Rat	Activated CD56bright NK cells,Activated CD56dim NK cells,Activated Vd1 Gamma-delta T cells,Adipocytes,Adipose,Astrocytes,B lymphocytes not otherwise specified,BDCA-1+ dendritic cells,Cardiomyocytes,Central memory helper T cells,Cerebellum,Crypt,Dendritic cells not otherwise specified,Endothelial cells not otherwise specified,Epidermis,Fibroblasts,Granulocytes not otherwise specified,Granulosa cel…
hsa-miR-942	miR-12202-3p (and other miRNAs w/seed CUUCUCU)	TargetScan Human	High (predicted)	HELLS	helicase, lymphoid specific	Cancer,Connective Tissue Disorders,Dermatological Diseases and Conditions,Developmental Disorder,Endocrine System Disorders,Gastrointestinal Disease,Hematological Disease,Hepatic System Disease,Hereditary Disorder,Immunological Disease,Metabolic Disease,Neurological Disease,Nutritional Disease,Organismal Injury and Abnormalities,Renal and Urological Disease,Reproductive System Disease,Respiratory…	Nucleus	enzyme		Human,Mouse	Activated helper T cells,Activated Vd1 Gamma-delta T cells,Activated Vd2 Gamma-delta T cells,Adipocytes,Adipose,B lymphocytes not otherwise specified,BDCA-1+ dendritic cells,BDCA-3+ dendritic cells,Cardiomyocytes,Central memory cytotoxic T cells,Crypt,Cytotoxic T cells,Dendritic cells not otherwise specified,Dermis,Effector memory cytotoxic T cells,Effector memory RA+ cytotoxic T cells,Effector T…
hsa-miR-942	miR-12202-3p (and other miRNAs w/seed CUUCUCU)	TargetScan Mouse	High (predicted)	HM13	histocompatibility minor 13	Cancer,Endocrine System Disorders,Gastrointestinal Disease,Organismal Injury and Abnormalities	Cytoplasm	peptidase		Human,Mouse,Rat	Adipocytes,Adipose,Astrocytes,B lymphocytes not otherwise specified,BDCA-1+ dendritic cells,BDCA-3+ dendritic cells,Bladder,Cardiomyocytes,Cerebellum,Crypt,Cytotoxic T cells,Dendritic cells not otherwise specified,Dermis,Dorsal Root Ganglion,Effector memory cytotoxic T cells,Effector memory RA+ cytotoxic T cells,Effector T cells,Endothelial cells not otherwise specified,Epidermis,Fibroblasts,Gran…
hsa-miR-942	miR-12202-3p (and other miRNAs w/seed CUUCUCU)	TargetScan Mouse,TargetScan Human	High (predicted),Moderate (predicted)	HPRT1	hypoxanthine phosphoribosyltransferase 1	Cancer,Cardiovascular Disease,Connective Tissue Disorders,Dermatological Diseases and Conditions,Developmental Disorder,Endocrine System Disorders,Gastrointestinal Disease,Hematological Disease,Hepatic System Disease,Hereditary Disorder,Immunological Disease,Inflammatory Disease,Inflammatory Response,Metabolic Disease,Neurological Disease,Nutritional Disease,Organismal Injury and Abnormalities,Ps…	Cytoplasm	enzyme	Adenine and Adenosine Salvage III,Guanine and Guanosine Salvage I	Human,Mouse,Rat	Activated CD56bright NK cells,Activated CD56dim NK cells,Activated helper T cells,Activated Vd1 Gamma-delta T cells,Activated Vd2 Gamma-delta T cells,Adipocytes,Adipose,Adrenal Gland,Amygdala,Astrocytes,B lymphocytes not otherwise specified,BDCA-1+ dendritic cells,BDCA-3+ dendritic cells,Bladder,Bone marrow cells not otherwise specified,Brain,Cardiomyocytes,CD56bright NK cells,CD56dim NK cells,Ce…
hsa-miR-942	miR-12202-3p (and other miRNAs w/seed CUUCUCU)	TargetScan Human	High (predicted)	HSBP1	heat shock factor binding protein 1	Developmental Disorder,Hereditary Disorder,Neurological Disease,Organismal Injury and Abnormalities,Psychological Disorders,Skeletal and Muscular Disorders	Nucleus	other		Human,Mouse,Rat	Activated CD56bright NK cells,Activated CD56dim NK cells,Activated helper T cells,Activated Vd1 Gamma-delta T cells,Activated Vd2 Gamma-delta T cells,Adipocytes,Adipose,Amygdala,Astrocytes,B lymphocytes not otherwise specified,BDCA-1+ dendritic cells,BDCA-3+ dendritic cells,Bladder,Cardiomyocytes,CD56bright NK cells,CD56dim NK cells,Central memory cytotoxic T cells,Central memory helper T cells,C…
hsa-miR-942	miR-12202-3p (and other miRNAs w/seed CUUCUCU)	TargetScan Mouse	High (predicted)	IDH3A	isocitrate dehydrogenase (NAD(+)) 3 catalytic subunit alpha	Cancer,Dermatological Diseases and Conditions,Hematological Disease,Hereditary Disorder,Immunological Disease,Neurological Disease,Ophthalmic Disease,Organismal Injury and Abnormalities,Psychological Disorders,Reproductive System Disease,Skeletal and Muscular Disorders	Cytoplasm	enzyme	TCA Cycle II (Eukaryotic)	Human,Mouse,Rat	Adipocytes,Adipose,Amygdala,Astrocytes,B lymphocytes not otherwise specified,Cardiomyocytes,Cerebellum,Cerebral Cortex,Crypt,Dendritic cells not otherwise specified,Dermis,Dorsal Root Ganglion,Endothelial cells not otherwise specified,Epidermis,Fibroblasts,Granulocytes not otherwise specified,Granulosa cells,Heart,Hematopoietic progenitor cells,Hepatocytes,Hippocampus,Hypothalamus,Keratinocytes,K…
hsa-miR-942	miR-12202-3p (and other miRNAs w/seed CUUCUCU)	TargetScan Human	High (predicted)	IFI27	interferon alpha inducible protein 27	Antimicrobial Response,Cancer,Cardiovascular Disease,Dermatological Diseases and Conditions,Endocrine System Disorders,Gastrointestinal Disease,Hematological Disease,Hepatic System Disease,Hereditary Disorder,Immunological Disease,Infectious Disease,Inflammatory Disease,Inflammatory Response,Metabolic Disease,Neurological Disease,Organismal Injury and Abnormalities,Reproductive System Disease,Res…	Cytoplasm	other		Human	Adipocytes,Adipose,Astrocytes,B lymphocytes not otherwise specified,Cardiomyocytes,Crypt,Dendritic cells not otherwise specified,Dermis,Endothelial cells not otherwise specified,Epidermis,Fibroblasts,Granulocytes not otherwise specified,Granulosa cells,Heart,Hematopoietic progenitor cells,Hepatocytes,Keratinocytes,Kidney,Langerhans cells,Liver,Lung,Macrophages not otherwise specified,Mammary Glan…
hsa-miR-942	miR-12202-3p (and other miRNAs w/seed CUUCUCU)	TargetScan Mouse	High (predicted)	IFNA4	interferon alpha 4	Antimicrobial Response,Cancer,Cardiovascular Disease,Connective Tissue Disorders,Dermatological Diseases and Conditions,Endocrine System Disorders,Gastrointestinal Disease,Hematological Disease,Hepatic System Disease,Hereditary Disorder,Immunological Disease,Infectious Disease,Inflammatory Disease,Inflammatory Response,Neurological Disease,Nutritional Disease,Organismal Injury and Abnormalities,R…	Extracellular Space	cytokine	Activation of IRF by Cytosolic Pattern Recognition Receptors,Coronavirus Pathogenesis Pathway,Glucocorticoid Receptor Signaling,IL-12 Signaling and Production in Macrophages,Immunogenic Cell Death Signaling Pathway,Macrophage Classical Activation Signaling Pathway,MicroRNA Biogenesis Signaling Pathway,Necroptosis Signaling Pathway,Neuroinflammation Signaling Pathway,Neutrophil Extracellular Trap …	Human,Mouse,Rat	Adipose,Amygdala,B lymphocytes not otherwise specified,Bladder,Brain,Cerebellum,Cerebral Cortex,Crypt,Cytotoxic T cells,Dorsal Root Ganglion,Effector T cells,Epidermis,Hippocampus,Hypothalamus,Kidney,Large Intestine,Liver,Lung,Mammary Gland,Olfactory Bulb,Other Cells,Ovary,Pancreas,Pituitary Gland,Placenta,Prostate Gland,Retina,Skeletal Muscle,Small Intestine,Spinal Cord,Spleen,Stomach,Substantia…
hsa-miR-942	miR-12202-3p (and other miRNAs w/seed CUUCUCU)	TargetScan Mouse	High (predicted)	IGFBP5	insulin like growth factor binding protein 5	Cancer,Cardiovascular Disease,Connective Tissue Disorders,Dermatological Diseases and Conditions,Endocrine System Disorders,Gastrointestinal Disease,Hematological Disease,Hereditary Disorder,Immunological Disease,Inflammatory Disease,Inflammatory Response,Metabolic Disease,Neurological Disease,Nutritional Disease,Organismal Injury and Abnormalities,Psychological Disorders,Renal and Urological Dis…	Extracellular Space	other	Hepatic Fibrosis / Hepatic Stellate Cell Activation,IGF-1 Signaling,VDR/RXR Activation	Human,Mouse,Rat	Adipocytes,Adipose,Amygdala,Astrocytes,B lymphocytes not otherwise specified,Bladder,Brain,Brainstem,Cardiomyocytes,Cells not otherwise specified,Cerebellum,Cerebral Cortex,Dendritic cells not otherwise specified,Dermis,Dorsal Root Ganglion,Endothelial cells not otherwise specified,Epidermis,Epithelial cells not otherwise specified,Fibroblasts,Granule cells,Granulocytes not otherwise specified,Gr…
hsa-miR-942	miR-12202-3p (and other miRNAs w/seed CUUCUCU)	TargetScan Mouse	High (predicted)	IL15RA	interleukin 15 receptor subunit alpha	Cancer,Connective Tissue Disorders,Developmental Disorder,Endocrine System Disorders,Gastrointestinal Disease,Hematological Disease,Hypersensitivity Response,Immunological Disease,Infectious Disease,Inflammatory Disease,Inflammatory Response,Metabolic Disease,Neurological Disease,Organismal Injury and Abnormalities,Renal and Urological Disease,Respiratory Disease,Skeletal and Muscular Disorders,T…	Plasma Membrane	transmembrane receptor	Cardiac Hypertrophy Signaling (Enhanced),Crosstalk between Dendritic Cells and Natural Killer Cells,FAK Signaling,Glucocorticoid Receptor Signaling,IL-15 Signaling,PI3K/AKT Signaling,Role of JAK1 and JAK3 in γc Cytokine Signaling,STAT3 Pathway	Human,Mouse,Rat	Adipocytes,Adipose,Astrocytes,B lymphocytes not otherwise specified,Brain,Brainstem,Cardiomyocytes,Cerebellum,Cerebral Cortex,Crypt,Dendritic cells not otherwise specified,Dermis,Endothelial cells not otherwise specified,Epidermis,Fibroblasts,Granulocytes not otherwise specified,Granulosa cells,Heart,Hematopoietic progenitor cells,Hepatocytes,Hippocampus,Keratinocytes,Kidney,Langerhans cells,Live…
hsa-miR-942	miR-12202-3p (and other miRNAs w/seed CUUCUCU)	TargetScan Mouse,TargetScan Human	High (predicted)	IL1RAPL1	interleukin 1 receptor accessory protein like 1	Cancer,Dermatological Diseases and Conditions,Developmental Disorder,Endocrine System Disorders,Gastrointestinal Disease,Hematological Disease,Hepatic System Disease,Hereditary Disorder,Immunological Disease,Neurological Disease,Organismal Injury and Abnormalities,Psychological Disorders,Renal and Urological Disease,Reproductive System Disease,Respiratory Disease	Plasma Membrane	transmembrane receptor	Activin Inhibin Signaling Pathway,Granulocyte Adhesion and Diapedesis,Hepatic Cholestasis,Hepatic Fibrosis / Hepatic Stellate Cell Activation,Hepatic Fibrosis Signaling Pathway,IL-10 Signaling,IL-6 Signaling,LPS/IL-1 Mediated Inhibition of RXR Function,LXR/RXR Activation,Osteoarthritis Pathway,p38 MAPK Signaling,Pathogen Induced Cytokine Storm Signaling Pathway,PPAR Signaling,PPARα/RXRα Activatio…	Human,Mouse,Rat	Activated helper T cells,Adipocytes,Adipose,Amygdala,Astrocytes,Brain,Cardiomyocytes,CD56bright NK cells,CD56dim NK cells,Central memory helper T cells,Cerebral Cortex,Dermis,Effector memory cytotoxic T cells,Effector memory helper T cells,Endothelial cells not otherwise specified,Epidermis,Fibroblasts,Granulocytes not otherwise specified,Granulosa cells,Heart,Hypothalamus,Keratinocytes,Langerhan…
hsa-miR-942	miR-12202-3p (and other miRNAs w/seed CUUCUCU)	TargetScan Human	High (predicted)	IMPG2	interphotoreceptor matrix proteoglycan 2	Cancer,Dermatological Diseases and Conditions,Developmental Disorder,Endocrine System Disorders,Gastrointestinal Disease,Hepatic System Disease,Hereditary Disorder,Neurological Disease,Ophthalmic Disease,Organismal Injury and Abnormalities,Reproductive System Disease	Extracellular Space	other		Human,Mouse,Rat	Adipocytes,Adipose,Astrocytes,B lymphocytes not otherwise specified,Cardiomyocytes,CD56dim NK cells,Dendritic cells not otherwise specified,Dermis,Endothelial cells not otherwise specified,Epidermis,Fibroblasts,Granulosa cells,Heart,Hepatocytes,Keratinocytes,Kidney,Liver,Macrophages not otherwise specified,Mammary Gland,Microglia,Monocytes not otherwise specified,Other Cells,Other Epithelial cell…
hsa-miR-942	miR-12202-3p (and other miRNAs w/seed CUUCUCU)	TargetScan Mouse	High (predicted)	INIP	INTS3 and NABP interacting protein	Cancer,Endocrine System Disorders,Gastrointestinal Disease,Organismal Injury and Abnormalities,Respiratory Disease	Nucleus	other		Human,Mouse,Rat	Adipocytes,Adipose,Amygdala,Astrocytes,B lymphocytes not otherwise specified,Bladder,Cardiomyocytes,Cerebellum,Cerebral Cortex,Crypt,Cytotoxic T cells,Dendritic cells not otherwise specified,Dermis,Dorsal Root Ganglion,Effector T cells,Endothelial cells not otherwise specified,Epidermis,Fibroblasts,Granulocytes not otherwise specified,Granulosa cells,Heart,Hematopoietic progenitor cells,Hepatocyt…
hsa-miR-942	miR-12202-3p (and other miRNAs w/seed CUUCUCU)	TargetScan Mouse	High (predicted)	INTS5	integrator complex subunit 5	Cancer,Dermatological Diseases and Conditions,Endocrine System Disorders,Gastrointestinal Disease,Hepatic System Disease,Neurological Disease,Organismal Injury and Abnormalities,Renal and Urological Disease,Respiratory Disease	Nucleus	other		Human,Mouse,Rat	Activated CD56bright NK cells,Activated CD56dim NK cells,Activated helper T cells,Activated Vd1 Gamma-delta T cells,Activated Vd2 Gamma-delta T cells,Adipocytes,Adipose,Astrocytes,B lymphocytes not otherwise specified,BDCA-1+ dendritic cells,BDCA-3+ dendritic cells,Cardiomyocytes,CD56bright NK cells,CD56dim NK cells,Central memory cytotoxic T cells,Central memory helper T cells,Crypt,Cytotoxic T …
hsa-miR-942	miR-12202-3p (and other miRNAs w/seed CUUCUCU)	TargetScan Mouse	High (predicted)	IPCEF1	interaction protein for cytohesin exchange factors 1	Cancer,Dermatological Diseases and Conditions,Endocrine System Disorders,Gastrointestinal Disease,Immunological Disease,Metabolic Disease,Neurological Disease,Organismal Injury and Abnormalities,Psychological Disorders,Reproductive System Disease	Cytoplasm	enzyme		Human,Mouse,Rat	Activated CD56bright NK cells,Activated CD56dim NK cells,Activated helper T cells,Activated Vd1 Gamma-delta T cells,Activated Vd2 Gamma-delta T cells,Adipocytes,Adipose,Amygdala,Astrocytes,B lymphocytes not otherwise specified,BDCA-1+ dendritic cells,BDCA-3+ dendritic cells,Brain,Cardiomyocytes,Central memory helper T cells,Cerebellum,Cerebral Cortex,Crypt,Cytotoxic T cells,Dendritic cells not ot…
hsa-miR-942	miR-12202-3p (and other miRNAs w/seed CUUCUCU)	TargetScan Mouse	High (predicted)	IPMK	inositol polyphosphate multikinase	Cancer,Dermatological Diseases and Conditions,Developmental Disorder,Endocrine System Disorders,Gastrointestinal Disease,Hereditary Disorder,Inflammatory Response,Neurological Disease,Organismal Injury and Abnormalities,Psychological Disorders,Reproductive System Disease,Respiratory Disease,Skeletal and Muscular Disorders	Nucleus	kinase	1D-myo-inositol Hexakisphosphate Biosynthesis II (Mammalian),1D-myo-inositol Hexakisphosphate Biosynthesis V (from Ins(1,3,4)P3),3-phosphoinositide Biosynthesis,D-myo-inositol (1,3,4)-trisphosphate Biosynthesis,D-myo-inositol (1,4,5,6)-Tetrakisphosphate Biosynthesis,D-myo-inositol (3,4,5,6)-tetrakisphosphate Biosynthesis,Inositol Pyrophosphates Biosynthesis,Superpathway of D-myo-inositol (1,4,5)-…	Human,Mouse,Rat	Adipocytes,Adipose,Amygdala,Astrocytes,B lymphocytes not otherwise specified,Bladder,Brain,Cardiomyocytes,Cerebellum,Cerebral Cortex,Crypt,Cytotoxic T cells,Dendritic cells not otherwise specified,Dermis,Dorsal Root Ganglion,Effector T cells,Endothelial cells not otherwise specified,Epidermis,Fibroblasts,Granule cells,Granulocytes not otherwise specified,Granulosa cells,Heart,Hematopoietic progen…
hsa-miR-942	miR-12202-3p (and other miRNAs w/seed CUUCUCU)	TargetScan Human	High (predicted)	IPO11	importin 11	Cancer,Developmental Disorder,Endocrine System Disorders,Gastrointestinal Disease,Hematological Disease,Hepatic System Disease,Immunological Disease,Infectious Disease,Neurological Disease,Organismal Injury and Abnormalities,Reproductive System Disease,Tumor Morphology	Nucleus	other		Human,Mouse,Rat	Adipocytes,Adipose,Amygdala,Astrocytes,B lymphocytes not otherwise specified,BDCA-1+ dendritic cells,BDCA-3+ dendritic cells,Brain,Cardiomyocytes,Central memory cytotoxic T cells,Cerebellum,Crypt,Cytotoxic T cells,Dendritic cells not otherwise specified,Dermis,Dorsal Root Ganglion,Effector memory cytotoxic T cells,Effector memory RA+ cytotoxic T cells,Effector T cells,Endothelial cells not otherw…
hsa-miR-942	miR-12202-3p (and other miRNAs w/seed CUUCUCU)	TargetScan Mouse	High (predicted)	ITGAM	integrin subunit alpha M	Antimicrobial Response,Cancer,Cardiovascular Disease,Connective Tissue Disorders,Dermatological Diseases and Conditions,Developmental Disorder,Endocrine System Disorders,Gastrointestinal Disease,Hematological Disease,Hepatic System Disease,Hereditary Disorder,Hypersensitivity Response,Immunological Disease,Infectious Disease,Inflammatory Disease,Inflammatory Response,Metabolic Disease,Neurologica…	Plasma Membrane	transmembrane receptor	Actin Cytoskeleton Signaling,Actin Nucleation by ARP-WASP Complex,Axonal Guidance Signaling,Cardiac Hypertrophy Signaling (Enhanced),Caveolar-mediated Endocytosis Signaling,CDC42 Signaling,Complement System,Ephrin Receptor Signaling,ERK/MAPK Signaling,FAK Signaling,Granulocyte Adhesion and Diapedesis,Hepatic Fibrosis Signaling Pathway,HGF Signaling,IL-12 Signaling and Production in Macrophages,IL…	Human,Mouse,Rat	Adipocytes,Adipose,Astrocytes,B lymphocytes not otherwise specified,Bone marrow cells not otherwise specified,Brain,Cardiomyocytes,Dendritic cells not otherwise specified,Dermis,Endothelial cells not otherwise specified,Eosinophils,Epidermis,Fibroblasts,Granulocytes not otherwise specified,Granulosa cells,Heart,Hematopoietic progenitor cells,Hepatocytes,Immune cells not otherwise specified,Kerati…
hsa-miR-942	miR-12202-3p (and other miRNAs w/seed CUUCUCU)	TargetScan Mouse,TargetScan Human	High (predicted)	JADE2	jade family PHD finger 2	Cancer,Dermatological Diseases and Conditions,Endocrine System Disorders,Gastrointestinal Disease,Hepatic System Disease,Neurological Disease,Organismal Injury and Abnormalities,Reproductive System Disease,Respiratory Disease	Nucleus	enzyme		Human,Mouse,Rat	Activated CD56bright NK cells,Activated CD56dim NK cells,Activated helper T cells,Activated Vd1 Gamma-delta T cells,Activated Vd2 Gamma-delta T cells,Adipocytes,Adipose,Astrocytes,B lymphocytes not otherwise specified,BDCA-1+ dendritic cells,BDCA-3+ dendritic cells,Cardiomyocytes,CD56bright NK cells,CD56dim NK cells,Central memory cytotoxic T cells,Central memory helper T cells,Crypt,Cytotoxic T …
hsa-miR-942	miR-12202-3p (and other miRNAs w/seed CUUCUCU)	TargetScan Mouse,TargetScan Human	High (predicted),Moderate (predicted)	JAKMIP2	janus kinase and microtubule interacting protein 2	Cancer,Dermatological Diseases and Conditions,Endocrine System Disorders,Gastrointestinal Disease,Hematological Disease,Hepatic System Disease,Immunological Disease,Organismal Injury and Abnormalities,Reproductive System Disease	Extracellular Space	other		Human,Mouse,Rat	Adipocytes,Adipose,Amygdala,Astrocytes,B lymphocytes not otherwise specified,Brain,Cardiomyocytes,Cerebellum,Cerebral Cortex,Dendritic cells not otherwise specified,Dermis,Dorsal Root Ganglion,Endothelial cells not otherwise specified,Epidermis,Fibroblasts,Granulocytes not otherwise specified,Granulosa cells,Heart,Hematopoietic progenitor cells,Hepatocytes,Hippocampus,Hypothalamus,Keratinocytes,K…
hsa-miR-942	miR-12202-3p (and other miRNAs w/seed CUUCUCU)	TargetScan Mouse	High (predicted)	KARS1	lysyl-tRNA synthetase 1	Auditory Disease,Cancer,Developmental Disorder,Hereditary Disorder,Infectious Disease,Inflammatory Response,Neurological Disease,Organismal Injury and Abnormalities,Reproductive System Disease,Respiratory Disease,Skeletal and Muscular Disorders	Cytoplasm	enzyme	tRNA Charging	Human,Mouse,Rat	Activated CD56bright NK cells,Activated CD56dim NK cells,Activated helper T cells,Activated Vd1 Gamma-delta T cells,Activated Vd2 Gamma-delta T cells,Adipocytes,Adipose,Amygdala,B lymphocytes not otherwise specified,BDCA-1+ dendritic cells,BDCA-3+ dendritic cells,Bladder,Cardiomyocytes,CD56bright NK cells,CD56dim NK cells,Central memory cytotoxic T cells,Central memory helper T cells,Cerebellum,C…
hsa-miR-942	miR-12202-3p (and other miRNAs w/seed CUUCUCU)	TargetScan Mouse	High (predicted)	KDELR1	KDEL endoplasmic reticulum protein retention receptor 1	Cancer,Endocrine System Disorders,Gastrointestinal Disease,Organismal Injury and Abnormalities,Reproductive System Disease,Respiratory Disease	Cytoplasm	transporter	Protein Kinase A Signaling	Human,Mouse,Rat	Activated helper T cells,Activated Vd1 Gamma-delta T cells,Activated Vd2 Gamma-delta T cells,Adipocytes,Adipose,Astrocytes,B lymphocytes not otherwise specified,BDCA-1+ dendritic cells,BDCA-3+ dendritic cells,Cardiomyocytes,Central memory cytotoxic T cells,Crypt,Cytotoxic T cells,Dendritic cells not otherwise specified,Dermis,Effector memory cytotoxic T cells,Effector memory RA+ cytotoxic T cells…
hsa-miR-942	miR-12202-3p (and other miRNAs w/seed CUUCUCU)	TargetScan Human	High (predicted)	KDM5A	lysine demethylase 5A	Cancer,Cardiovascular Disease,Dermatological Diseases and Conditions,Developmental Disorder,Endocrine System Disorders,Gastrointestinal Disease,Hematological Disease,Hepatic System Disease,Hereditary Disorder,Immunological Disease,Inflammatory Response,Neurological Disease,Organismal Injury and Abnormalities,Psychological Disorders,Renal and Urological Disease,Reproductive System Disease,Respirat…	Nucleus	transcription regulator	Dilated Cardiomyopathy Signaling Pathway	Human,Mouse,Rat	Activated CD56bright NK cells,Activated CD56dim NK cells,Activated helper T cells,Activated Vd1 Gamma-delta T cells,Activated Vd2 Gamma-delta T cells,Adipocytes,Adipose,Amygdala,Astrocytes,B lymphocytes not otherwise specified,BDCA-1+ dendritic cells,BDCA-3+ dendritic cells,Bladder,Cardiomyocytes,CD56dim NK cells,Central memory cytotoxic T cells,Central memory helper T cells,Cerebellum,Cerebral C…
hsa-miR-942	miR-12202-3p (and other miRNAs w/seed CUUCUCU)	TargetScan Human	High (predicted)	KLRC4-KLRK1/KLRK1	killer cell lectin like receptor K1	Cancer,Endocrine System Disorders,Gastrointestinal Disease,Hematological Disease,Immunological Disease,Infectious Disease,Inflammatory Disease,Inflammatory Response,Neurological Disease,Organismal Injury and Abnormalities,Reproductive System Disease,Respiratory Disease,Tumor Morphology	Plasma Membrane	transmembrane receptor	Crosstalk between Dendritic Cells and Natural Killer Cells,Natural Killer Cell Signaling	Human	Activated CD56bright NK cells,Activated CD56dim NK cells,Activated Vd1 Gamma-delta T cells,Activated Vd2 Gamma-delta T cells,B lymphocytes not otherwise specified,Cardiomyocytes,CD56bright NK cells,CD56dim NK cells,Central memory cytotoxic T cells,Cytotoxic T cells,Dendritic cells not otherwise specified,Dermis,Effector memory cytotoxic T cells,Effector memory helper T cells,Effector memory RA+ c…
hsa-miR-942	miR-12202-3p (and other miRNAs w/seed CUUCUCU)	Ingenuity Expert Findings,TargetScan Human	Experimentally Observed,High (predicted)	KNG1	kininogen 1	Auditory Disease,Cancer,Cardiovascular Disease,Dermatological Diseases and Conditions,Developmental Disorder,Endocrine System Disorders,Gastrointestinal Disease,Hematological Disease,Hepatic System Disease,Hereditary Disorder,Hypersensitivity Response,Inflammatory Disease,Inflammatory Response,Metabolic Disease,Neurological Disease,Organismal Injury and Abnormalities,Psychological Disorders,Renal…	Extracellular Space	other	Actin Cytoskeleton Signaling,Coagulation System,Coronavirus Pathogenesis Pathway,DHCR24 Signaling Pathway,eNOS Signaling,FXR/RXR Activation,Intrinsic Prothrombin Activation Pathway,LXR/RXR Activation,Neuroprotective Role of THOP1 in Alzheimer's Disease,Neurovascular Coupling Signaling Pathway,Nitric Oxide Signaling in the Cardiovascular System,Systemic Lupus Erythematosus Signaling	Human,Mouse,Rat	Adipocytes,Adipose,Astrocytes,B lymphocytes not otherwise specified,Blood platelets,Brain,Cardiomyocytes,Crypt,Endothelial cells not otherwise specified,Fibroblasts,Heart,Hematopoietic progenitor cells,Hepatocytes,Kidney,Liver,Microglia,Neutrophils,Other Cells,Other Epithelial cells,Other Nervous System,Other Neurons,Other Organ Systems,Pancreas,Placenta,Prostate Gland,Smooth Muscle,Smooth muscle…
hsa-miR-942	miR-12202-3p (and other miRNAs w/seed CUUCUCU)	TargetScan Mouse	High (predicted)	Krtap16-3	keratin associated protein 16-3		Other	other		Mouse
hsa-miR-942	miR-12202-3p (and other miRNAs w/seed CUUCUCU)	TargetScan Human	High (predicted)	LACC1	laccase domain containing 1	Cancer,Connective Tissue Disorders,Dermatological Diseases and Conditions,Gastrointestinal Disease,Hereditary Disorder,Inflammatory Disease,Inflammatory Response,Neurological Disease,Organismal Injury and Abnormalities,Skeletal and Muscular Disorders	Cytoplasm	enzyme	Adenine and Adenosine Salvage I,Adenine and Adenosine Salvage III,Adenosine Nucleotides Degradation II,Arsenate Detoxification I (Glutaredoxin),Guanine and Guanosine Salvage I,Guanosine Nucleotides Degradation III,Purine Nucleotides Degradation II (Aerobic),Purine Ribonucleosides Degradation to Ribose-1-phosphate,S-methyl-5'-thioadenosine Degradation II,Urate Biosynthesis/Inosine 5'-phosphate Deg…	Human,Mouse,Rat	Adipocytes,Adipose,Astrocytes,B lymphocytes not otherwise specified,BDCA-1+ dendritic cells,BDCA-3+ dendritic cells,Cardiomyocytes,Central memory cytotoxic T cells,Crypt,Dendritic cells not otherwise specified,Dermis,Effector memory cytotoxic T cells,Effector memory RA+ cytotoxic T cells,Endothelial cells not otherwise specified,Epidermis,Fibroblasts,Granulocytes not otherwise specified,Granulosa…
hsa-miR-942	miR-12202-3p (and other miRNAs w/seed CUUCUCU)	TargetScan Human	High (predicted)	LBHD1	LBH domain containing 1	Cancer,Gastrointestinal Disease,Hepatic System Disease,Neurological Disease,Organismal Injury and Abnormalities	Other	other		Human,Mouse	Adipocytes,Adipose,B lymphocytes not otherwise specified,Cardiomyocytes,Dendritic cells not otherwise specified,Endothelial cells not otherwise specified,Fibroblasts,Granulocytes not otherwise specified,Granulosa cells,Heart,Hematopoietic progenitor cells,Hepatocytes,Kidney,Liver,Lung,Macrophages not otherwise specified,Mammary Gland,Microglia,Monocytes not otherwise specified,NK cells not otherw…
hsa-miR-942	miR-12202-3p (and other miRNAs w/seed CUUCUCU)	TargetScan Human	High (predicted)	LGSN	lengsin, lens protein with glutamine synthetase domain	Cancer,Dermatological Diseases and Conditions,Endocrine System Disorders,Gastrointestinal Disease,Hematological Disease,Hepatic System Disease,Immunological Disease,Neurological Disease,Ophthalmic Disease,Organismal Injury and Abnormalities,Reproductive System Disease,Respiratory Disease	Plasma Membrane	enzyme		Human,Mouse,Rat	Cardiomyocytes,Crypt,Endothelial cells not otherwise specified,Fibroblasts,Granulosa cells,Heart,Hepatocytes,Kidney,Liver,Lung,Macrophages not otherwise specified,Microglia,Other Cells,Other Epithelial cells,Other Nervous System,Other Neurons,Other Organ Systems,Ovary,Pancreas,Placenta,Plasma cells,Prostate Gland,Retina,Smooth Muscle,Smooth muscle cells not otherwise specified,T lymphocytes not o…
hsa-miR-942	miR-12202-3p (and other miRNAs w/seed CUUCUCU)	TargetScan Human	High (predicted)	LINC01517	long intergenic non-protein coding RNA 1517		Other	other		Human
hsa-miR-942	miR-12202-3p (and other miRNAs w/seed CUUCUCU)	TargetScan Human	High (predicted)	LINC01554	long intergenic non-protein coding RNA 1554	Cancer,Gastrointestinal Disease,Hepatic System Disease,Organismal Injury and Abnormalities	Other	other		Human	BDCA-1+ dendritic cells,Immature monocyte-derived dendritic cells,Mature monocyte-derived dendritic cells,Natural T-regulatory cells,HOP-62
hsa-miR-942	miR-12202-3p (and other miRNAs w/seed CUUCUCU)	TargetScan Human	High (predicted)	LINC01949	long intergenic non-protein coding RNA 1949		Other	other		Human
hsa-miR-942	miR-12202-3p (and other miRNAs w/seed CUUCUCU)	TargetScan Human	High (predicted)	LOC100287944	uncharacterized LOC100287944		Other	other		Human
hsa-miR-942	miR-12202-3p (and other miRNAs w/seed CUUCUCU)	TargetScan Mouse	High (predicted)	LPL	lipoprotein lipase	Cancer,Cardiovascular Disease,Connective Tissue Disorders,Dermatological Diseases and Conditions,Developmental Disorder,Endocrine System Disorders,Gastrointestinal Disease,Hematological Disease,Hepatic System Disease,Hereditary Disorder,Immunological Disease,Infectious Disease,Inflammatory Disease,Inflammatory Response,Metabolic Disease,Neurological Disease,Nutritional Disease,Ophthalmic Disease,…	Cytoplasm	enzyme	Adipogenesis pathway,Atherosclerosis Signaling,FXR/RXR Activation,Gustation Pathway,LXR/RXR Activation,Macrophage Alternative Activation Signaling Pathway,Oxytocin Signaling Pathway,Phospholipases,PPARα/RXRα Activation,Retinol Biosynthesis,Triacylglycerol Degradation	Human,Mouse,Rat	Adipocytes,Adipose,Adrenal Gland,Amygdala,Astrocytes,B lymphocytes not otherwise specified,Bladder,Brain,Cardiomyocytes,Dendritic cells not otherwise specified,Dermis,Dorsal Root Ganglion,Endothelial cells not otherwise specified,Epidermis,Fibroblasts,Granulocytes not otherwise specified,Granulosa cells,Heart,Hippocampus,Keratinocytes,Kidney,Langerhans cells,Large Intestine,Liver,Lung,Macrophages…
hsa-miR-942	miR-12202-3p (and other miRNAs w/seed CUUCUCU)	TargetScan Mouse,TargetScan Human	High (predicted),Moderate (predicted)	LPP	LIM domain containing preferred translocation partner in lipoma	Cancer,Connective Tissue Disorders,Dermatological Diseases and Conditions,Endocrine System Disorders,Gastrointestinal Disease,Hematological Disease,Hepatic System Disease,Hereditary Disorder,Immunological Disease,Inflammatory Disease,Inflammatory Response,Neurological Disease,Organismal Injury and Abnormalities,Psychological Disorders,Reproductive System Disease,Respiratory Disease,Skeletal and M…	Nucleus	other		Human,Mouse,Rat	Activated CD56bright NK cells,Activated CD56dim NK cells,Activated helper T cells,Activated Vd1 Gamma-delta T cells,Activated Vd2 Gamma-delta T cells,Adipocytes,Adipose,Amygdala,Astrocytes,B lymphocytes not otherwise specified,BDCA-1+ dendritic cells,BDCA-3+ dendritic cells,Bladder,Cardiomyocytes,CD56bright NK cells,CD56dim NK cells,Central memory cytotoxic T cells,Central memory helper T cells,C…
hsa-miR-942	miR-12202-3p (and other miRNAs w/seed CUUCUCU)	TargetScan Human	High (predicted)	LRRC27	leucine rich repeat containing 27	Cancer,Dermatological Diseases and Conditions,Endocrine System Disorders,Gastrointestinal Disease,Hepatic System Disease,Organismal Injury and Abnormalities,Reproductive System Disease	Other	other		Human,Mouse,Rat	Adipocytes,Adipose,Astrocytes,B lymphocytes not otherwise specified,BDCA-1+ dendritic cells,BDCA-3+ dendritic cells,Cardiomyocytes,Crypt,Dendritic cells not otherwise specified,Dermis,Endothelial cells not otherwise specified,Epidermis,Fibroblasts,Granulocytes not otherwise specified,Granulosa cells,Heart,Hematopoietic progenitor cells,Hepatocytes,Immature monocyte-derived dendritic cells,Keratin…
hsa-miR-942	miR-12202-3p (and other miRNAs w/seed CUUCUCU)	TargetScan Human	High (predicted)	MAP4K4	mitogen-activated protein kinase kinase kinase kinase 4	Cancer,Cardiovascular Disease,Connective Tissue Disorders,Dermatological Diseases and Conditions,Developmental Disorder,Endocrine System Disorders,Gastrointestinal Disease,Hematological Disease,Hepatic System Disease,Hereditary Disorder,Immunological Disease,Infectious Disease,Inflammatory Disease,Inflammatory Response,Neurological Disease,Organismal Injury and Abnormalities,Reproductive System D…	Cytoplasm	kinase	Apoptosis Signaling,Creatine-phosphate Biosynthesis,Death Receptor Signaling,Ephrin Receptor Signaling,IL-10 Signaling,IL-6 Signaling,IL-8 Signaling,NF-κB Signaling,NOD1/2 Signaling Pathway,PPAR Signaling,PPARα/RXRα Activation,SAPK/JNK Signaling,Systemic Lupus Erythematosus In B Cell Signaling Pathway,Toll-like Receptor Signaling	Human,Mouse,Rat	Activated helper T cells,Adipocytes,Adipose,Astrocytes,B lymphocytes not otherwise specified,BDCA-1+ dendritic cells,BDCA-3+ dendritic cells,Brain,Cardiomyocytes,Central memory cytotoxic T cells,Crypt,Dendritic cells not otherwise specified,Dermis,Effector memory cytotoxic T cells,Effector memory RA+ cytotoxic T cells,Endothelial cells not otherwise specified,Epidermis,Fibroblasts,Granulocytes no…
hsa-miR-942	miR-12202-3p (and other miRNAs w/seed CUUCUCU)	TargetScan Human	High (predicted)	MAT2B	methionine adenosyltransferase 2B	Cancer,Dermatological Diseases and Conditions,Endocrine System Disorders,Gastrointestinal Disease,Hepatic System Disease,Organismal Injury and Abnormalities,Reproductive System Disease	Cytoplasm	enzyme	Cysteine Biosynthesis III (mammalia),Methionine Degradation I (to Homocysteine),S-adenosyl-L-methionine Biosynthesis,Superpathway of Methionine Degradation	Human,Mouse,Rat	Adipocytes,Adipose,Adrenal Gland,Amygdala,Astrocytes,B lymphocytes not otherwise specified,Bladder,Brain,Cardiomyocytes,Cerebellum,Cerebral Cortex,Crypt,Cytotoxic T cells,Dendritic cells not otherwise specified,Dermis,Dorsal Root Ganglion,Effector T cells,Endothelial cells not otherwise specified,Epidermis,Fibroblasts,Granulocytes not otherwise specified,Granulosa cells,Heart,Hematopoietic progen…
hsa-miR-942	miR-12202-3p (and other miRNAs w/seed CUUCUCU)	TargetScan Mouse	High (predicted)	MBD1	methyl-CpG binding domain protein 1	Cancer,Connective Tissue Disorders,Dermatological Diseases and Conditions,Endocrine System Disorders,Gastrointestinal Disease,Hematological Disease,Immunological Disease,Inflammatory Disease,Inflammatory Response,Neurological Disease,Organismal Injury and Abnormalities,Renal and Urological Disease,Reproductive System Disease,Skeletal and Muscular Disorders	Nucleus	transcription regulator	DNA Methylation and Transcriptional Repression Signaling	Human,Mouse,Rat	Activated helper T cells,Adipocytes,Adipose,Amygdala,Astrocytes,B lymphocytes not otherwise specified,BDCA-1+ dendritic cells,Bladder,Brain,Cardiomyocytes,Cells not otherwise specified,Central memory cytotoxic T cells,Cerebellum,Crypt,Cytotoxic T cells,Dendritic cells not otherwise specified,Dermis,Dorsal Root Ganglion,Effector memory cytotoxic T cells,Effector memory RA+ cytotoxic T cells,Effect…
hsa-miR-942	miR-12202-3p (and other miRNAs w/seed CUUCUCU)	TargetScan Human	High (predicted)	MCFD2	multiple coagulation factor deficiency 2, ER cargo receptor complex subunit	Cancer,Developmental Disorder,Endocrine System Disorders,Gastrointestinal Disease,Hematological Disease,Hereditary Disorder,Immunological Disease,Metabolic Disease,Organismal Injury and Abnormalities	Cytoplasm	other		Human,Mouse,Rat	Activated CD56bright NK cells,Activated CD56dim NK cells,Activated helper T cells,Activated Vd1 Gamma-delta T cells,Activated Vd2 Gamma-delta T cells,Adipocytes,Adipose,Astrocytes,B lymphocytes not otherwise specified,BDCA-1+ dendritic cells,BDCA-3+ dendritic cells,Brain,Cardiomyocytes,CD56bright NK cells,CD56dim NK cells,Central memory cytotoxic T cells,Central memory helper T cells,Cerebral Cor…
hsa-miR-942	miR-12202-3p (and other miRNAs w/seed CUUCUCU)	TargetScan Mouse	High (predicted)	MESP2	mesoderm posterior bHLH transcription factor 2	Cancer,Cardiovascular Disease,Connective Tissue Disorders,Dermatological Diseases and Conditions,Developmental Disorder,Endocrine System Disorders,Gastrointestinal Disease,Hematological Disease,Hepatic System Disease,Hereditary Disorder,Immunological Disease,Neurological Disease,Organismal Injury and Abnormalities,Reproductive System Disease,Skeletal and Muscular Disorders	Nucleus	transcription regulator		Human,Mouse,Rat	Adipocytes,Adipose,Amygdala,Cardiomyocytes,Central memory cytotoxic T cells,Crypt,Cytotoxic T cells,Dendritic cells not otherwise specified,Effector memory cytotoxic T cells,Effector memory RA+ cytotoxic T cells,Endothelial cells not otherwise specified,Epidermis,Fibroblasts,Granulosa cells,Heart,Hepatocytes,Immature monocyte-derived dendritic cells,Kidney,Liver,Macrophages not otherwise specifie…
hsa-miR-942	miR-12202-3p (and other miRNAs w/seed CUUCUCU)	TargetScan Human	High (predicted)	METTL15	methyltransferase like 15	Cancer,Endocrine System Disorders,Gastrointestinal Disease,Organismal Injury and Abnormalities,Reproductive System Disease,Respiratory Disease	Cytoplasm	enzyme		Human,Mouse	Activated helper T cells,Adipocytes,Adipose,Astrocytes,B lymphocytes not otherwise specified,BDCA-1+ dendritic cells,BDCA-3+ dendritic cells,Bladder,Cardiomyocytes,Crypt,Cytotoxic T cells,Dendritic cells not otherwise specified,Dermis,Effector memory RA+ cytotoxic T cells,Effector T cells,Endothelial cells not otherwise specified,Epidermis,Fibroblasts,Granulocytes not otherwise specified,Granulos…
hsa-miR-942	miR-12202-3p (and other miRNAs w/seed CUUCUCU)	TargetScan Mouse	High (predicted)	MFGE8	milk fat globule EGF and factor V/VIII domain containing	Cancer,Cardiovascular Disease,Connective Tissue Disorders,Endocrine System Disorders,Gastrointestinal Disease,Immunological Disease,Infectious Disease,Inflammatory Disease,Inflammatory Response,Metabolic Disease,Neurological Disease,Organismal Injury and Abnormalities,Psychological Disorders,Renal and Urological Disease,Reproductive System Disease,Skeletal and Muscular Disorders,Tumor Morphology	Extracellular Space	other	Neuroinflammation Signaling Pathway	Human,Mouse,Rat	Adipocytes,Adipose,Amygdala,Astrocytes,B lymphocytes not otherwise specified,BDCA-3+ dendritic cells,Bladder,Brain,Cardiomyocytes,Cerebellum,Cerebral Cortex,Crypt,Dendritic cells not otherwise specified,Dermis,Dorsal Root Ganglion,Effector memory RA+ cytotoxic T cells,Effector T cells,Endothelial cells not otherwise specified,Epidermis,Fibroblasts,Granule cells,Granulocytes not otherwise specifie…
hsa-miR-942	miR-12202-3p (and other miRNAs w/seed CUUCUCU)	TargetScan Human	High (predicted)	MRFAP1L1	Morf4 family associated protein 1 like 1	Cancer,Endocrine System Disorders,Organismal Injury and Abnormalities	Other	other		Human	Activated CD56bright NK cells,Activated CD56dim NK cells,Activated helper T cells,Activated Vd1 Gamma-delta T cells,Activated Vd2 Gamma-delta T cells,Adipocytes,Adipose,Astrocytes,B lymphocytes not otherwise specified,BDCA-1+ dendritic cells,BDCA-3+ dendritic cells,Cardiomyocytes,CD56bright NK cells,CD56dim NK cells,Central memory cytotoxic T cells,Central memory helper T cells,Crypt,Cytotoxic T …
hsa-miR-942	miR-12202-3p (and other miRNAs w/seed CUUCUCU)	TargetScan Mouse	High (predicted)	MRGBP	MRG domain binding protein	Cancer,Gastrointestinal Disease,Organismal Injury and Abnormalities,Reproductive System Disease	Nucleus	other		Human,Mouse,Rat	Activated CD56bright NK cells,Activated CD56dim NK cells,Activated helper T cells,Activated Vd1 Gamma-delta T cells,Activated Vd2 Gamma-delta T cells,Adipocytes,Adipose,Amygdala,Astrocytes,B lymphocytes not otherwise specified,BDCA-1+ dendritic cells,BDCA-3+ dendritic cells,Bladder,Cardiomyocytes,Central memory helper T cells,Cerebellum,Cerebral Cortex,Crypt,Cytotoxic T cells,Dendritic cells not …
hsa-miR-942	miR-12202-3p (and other miRNAs w/seed CUUCUCU)	TargetScan Mouse	High (predicted)	MRGPRG	MAS related GPR family member G	Cancer,Endocrine System Disorders,Organismal Injury and Abnormalities,Reproductive System Disease,Respiratory Disease	Plasma Membrane	G-protein coupled receptor		Human,Mouse,Rat	Brain,Cardiomyocytes,Heart,Other Nervous System,Other Neurons
hsa-miR-942	miR-12202-3p (and other miRNAs w/seed CUUCUCU)	TargetScan Human	High (predicted)	MRPL33	mitochondrial ribosomal protein L33		Cytoplasm	other		Human,Mouse,Rat	Activated CD56bright NK cells,Activated CD56dim NK cells,Activated helper T cells,Activated Vd1 Gamma-delta T cells,Activated Vd2 Gamma-delta T cells,Adipocytes,Adipose,Astrocytes,B lymphocytes not otherwise specified,BDCA-1+ dendritic cells,BDCA-3+ dendritic cells,Cardiomyocytes,Central memory cytotoxic T cells,Central memory helper T cells,Crypt,Cytotoxic T cells,Dendritic cells not otherwise s…
hsa-miR-942	miR-12202-3p (and other miRNAs w/seed CUUCUCU)	TargetScan Human	High (predicted)	MRPL48	mitochondrial ribosomal protein L48	Cancer,Dermatological Diseases and Conditions,Endocrine System Disorders,Neurological Disease,Organismal Injury and Abnormalities,Psychological Disorders,Respiratory Disease	Cytoplasm	other		Human,Mouse,Rat	Activated CD56bright NK cells,Activated CD56dim NK cells,Activated helper T cells,Activated Vd1 Gamma-delta T cells,Activated Vd2 Gamma-delta T cells,Adipocytes,Adipose,Amygdala,Astrocytes,B lymphocytes not otherwise specified,BDCA-1+ dendritic cells,BDCA-3+ dendritic cells,Cardiomyocytes,Central memory cytotoxic T cells,Central memory helper T cells,Cerebellum,Crypt,Cytotoxic T cells,Dendritic c…
hsa-miR-942	miR-12202-3p (and other miRNAs w/seed CUUCUCU)	TargetScan Mouse,TargetScan Human	High (predicted),Moderate (predicted)	MTARC1	mitochondrial amidoxime reducing component 1	Cardiovascular Disease,Organismal Injury and Abnormalities	Cytoplasm	enzyme		Human,Mouse,Rat	Adipocytes,Adipose,B lymphocytes not otherwise specified,Cardiomyocytes,Dorsal Root Ganglion,Endothelial cells not otherwise specified,Epidermis,Fibroblasts,Heart,Kidney,Large Intestine,Liver,Macrophages not otherwise specified,Neutrophils,Other Cells,Other Epithelial cells,Other Nervous System,Ovary,Pituitary Gland,Placenta,Skeletal Muscle,Smooth Muscle,Smooth muscle cells not otherwise specifie…
hsa-miR-942	miR-12202-3p (and other miRNAs w/seed CUUCUCU)	TargetScan Mouse,TargetScan Human	High (predicted),Moderate (predicted)	MTFMT	mitochondrial methionyl-tRNA formyltransferase	Cancer,Connective Tissue Disorders,Dermatological Diseases and Conditions,Developmental Disorder,Endocrine System Disorders,Gastrointestinal Disease,Hepatic System Disease,Hereditary Disorder,Metabolic Disease,Neurological Disease,Organismal Injury and Abnormalities,Skeletal and Muscular Disorders	Cytoplasm	enzyme		Human,Mouse,Rat	Activated helper T cells,Adipocytes,Adipose,Amygdala,Astrocytes,B lymphocytes not otherwise specified,BDCA-1+ dendritic cells,BDCA-3+ dendritic cells,Bladder,Cardiomyocytes,Central memory cytotoxic T cells,Cerebellum,Cerebral Cortex,Crypt,Cytotoxic T cells,Dendritic cells not otherwise specified,Dermis,Dorsal Root Ganglion,Effector memory cytotoxic T cells,Effector memory RA+ cytotoxic T cells,Ef…
hsa-miR-942	miR-12202-3p (and other miRNAs w/seed CUUCUCU)	TargetScan Mouse,TargetScan Human	High (predicted),Moderate (predicted)	MTFR1L	mitochondrial fission regulator 1 like	Cancer,Endocrine System Disorders,Gastrointestinal Disease,Hepatic System Disease,Neurological Disease,Organismal Injury and Abnormalities,Reproductive System Disease,Respiratory Disease	Other	other		Human,Mouse,Rat	Adipocytes,Adipose,Amygdala,Astrocytes,B lymphocytes not otherwise specified,Bladder,Cardiomyocytes,Cerebellum,Cerebral Cortex,Crypt,Dendritic cells not otherwise specified,Dermis,Dorsal Root Ganglion,Endothelial cells not otherwise specified,Epidermis,Fibroblasts,Granulocytes not otherwise specified,Granulosa cells,Heart,Hematopoietic progenitor cells,Hepatocytes,Hypothalamus,Keratinocytes,Kidne…
hsa-miR-942	miR-12202-3p (and other miRNAs w/seed CUUCUCU)	TargetScan Mouse	High (predicted)	MTUS2	microtubule associated scaffold protein 2	Cancer,Dermatological Diseases and Conditions,Endocrine System Disorders,Gastrointestinal Disease,Hematological Disease,Hepatic System Disease,Immunological Disease,Neurological Disease,Organismal Injury and Abnormalities,Reproductive System Disease,Respiratory Disease	Nucleus	other		Human,Mouse	Adipocytes,Adipose,Astrocytes,B lymphocytes not otherwise specified,Cardiomyocytes,Cerebellum,Dermis,Endothelial cells not otherwise specified,Epidermis,Fibroblasts,Granulosa cells,Heart,Hematopoietic progenitor cells,Hepatocytes,Hippocampus,Hypothalamus,Keratinocytes,Langerhans cells,Liver,Lung,Macrophages not otherwise specified,Mammary Gland,Melanocytes,Microglia,Monocytes not otherwise specif…
hsa-miR-942	miR-12202-3p (and other miRNAs w/seed CUUCUCU)	TargetScan Mouse	High (predicted)	MYBPH	myosin binding protein H	Cancer,Dermatological Diseases and Conditions,Endocrine System Disorders,Gastrointestinal Disease,Hepatic System Disease,Neurological Disease,Organismal Injury and Abnormalities,Reproductive System Disease,Respiratory Disease	Cytoplasm	other		Human,Mouse,Rat	Astrocytes,Cardiomyocytes,Dorsal Root Ganglion,Epidermis,Fibroblasts,Heart,Kidney,Lung,Macrophages not otherwise specified,Mammary Gland,Microglia,Other Epithelial cells,Pancreas,Placenta,Prostate Gland,Skeletal Muscle,Smooth Muscle,Smooth muscle cells not otherwise specified,T lymphocytes not otherwise specified,Thymus,Uterus,SNB-75,THP-1
hsa-miR-942	miR-12202-3p (and other miRNAs w/seed CUUCUCU)	TargetScan Human	High (predicted)	NDUFAF2	NADH:ubiquinone oxidoreductase complex assembly factor 2	Cancer,Dermatological Diseases and Conditions,Developmental Disorder,Hereditary Disorder,Infectious Disease,Metabolic Disease,Neurological Disease,Organismal Injury and Abnormalities,Renal and Urological Disease,Skeletal and Muscular Disorders	Cytoplasm	other		Human,Mouse,Rat	Adipocytes,Adipose,Astrocytes,B lymphocytes not otherwise specified,Cardiomyocytes,Crypt,Dendritic cells not otherwise specified,Dermis,Dorsal Root Ganglion,Endothelial cells not otherwise specified,Epidermis,Fibroblasts,Granulocytes not otherwise specified,Granulosa cells,Heart,Hematopoietic progenitor cells,Hepatocytes,Keratinocytes,Kidney,Langerhans cells,Liver,Lung,Macrophages not otherwise s…
hsa-miR-942	miR-12202-3p (and other miRNAs w/seed CUUCUCU)	TargetScan Mouse	High (predicted)	NEFH	neurofilament heavy chain	Cancer,Dermatological Diseases and Conditions,Endocrine System Disorders,Gastrointestinal Disease,Hematological Disease,Hepatic System Disease,Hereditary Disorder,Immunological Disease,Metabolic Disease,Neurological Disease,Nutritional Disease,Organismal Injury and Abnormalities,Psychological Disorders,Renal and Urological Disease,Reproductive System Disease,Respiratory Disease,Skeletal and Muscu…	Cytoplasm	other	Amyotrophic Lateral Sclerosis Signaling	Human,Mouse,Rat	Activated helper T cells,Activated Vd1 Gamma-delta T cells,Activated Vd2 Gamma-delta T cells,Adipocytes,Adipose,Amygdala,Astrocytes,B lymphocytes not otherwise specified,BDCA-1+ dendritic cells,BDCA-3+ dendritic cells,Brain,Cardiomyocytes,Cerebellum,Cerebral Cortex,Dendritic cells not otherwise specified,Dermis,Dorsal Root Ganglion,Endothelial cells not otherwise specified,Epidermis,Fibroblasts,G…
hsa-miR-942	miR-12202-3p (and other miRNAs w/seed CUUCUCU)	TargetScan Human	High (predicted)	NEXMIF	neurite extension and migration factor	Cancer,Dermatological Diseases and Conditions,Developmental Disorder,Endocrine System Disorders,Gastrointestinal Disease,Hematological Disease,Hepatic System Disease,Hereditary Disorder,Immunological Disease,Neurological Disease,Organismal Injury and Abnormalities,Reproductive System Disease,Respiratory Disease	Nucleus	enzyme		Human,Mouse,Rat	Adipocytes,Adipose,B lymphocytes not otherwise specified,Central memory cytotoxic T cells,Effector memory cytotoxic T cells,Effector memory RA+ cytotoxic T cells,Endothelial cells not otherwise specified,Fibroblasts,Kidney,Lung,Macrophages not otherwise specified,Mammary Gland,Mature monocyte-derived dendritic cells,Other Cells,Other Epithelial cells,Other Nervous System,Other Organ Systems,Pancr…
hsa-miR-942	miR-12202-3p (and other miRNAs w/seed CUUCUCU)	TargetScan Human	High (predicted)	NKX6-1	NK6 homeobox 1	Cancer,Endocrine System Disorders,Gastrointestinal Disease,Metabolic Disease,Neurological Disease,Organismal Injury and Abnormalities,Skeletal and Muscular Disorders	Nucleus	transcription regulator	Maturity Onset Diabetes of Young (MODY) Signaling	Human,Mouse,Rat	Adipocytes,Adipose,Beta islet cells,Cardiomyocytes,Endothelial cells not otherwise specified,Fibroblasts,Heart,Microglia,Monocytes not otherwise specified,Mononuclear leukocytes not otherwise specified,Other Cells,Other Epithelial cells,Other Nervous System,Ovary,Pancreas,Placenta,Smooth Muscle,Smooth muscle cells not otherwise specified,Stromal cells,Testis,Thymus,Uterus,Other Cell Line,Other Ki…
hsa-miR-942	miR-12202-3p (and other miRNAs w/seed CUUCUCU)	TargetScan Mouse	High (predicted)	Npy6r	neuropeptide Y receptor Y6		Plasma Membrane	G-protein coupled receptor		Mouse	B lymphocytes not otherwise specified,Bladder,Brain,Cerebellum,Cytotoxic T cells,Effector T cells,Heart,Hypothalamus,Kidney,Large Intestine,Liver,Mammary Gland,Olfactory Bulb,Other Nervous System,Ovary,Skeletal Muscle,Small Intestine,Testis
hsa-miR-942	miR-12202-3p (and other miRNAs w/seed CUUCUCU)	TargetScan Mouse,TargetScan Human	High (predicted),Moderate (predicted)	NQO2	N-ribosyldihydronicotinamide:quinone reductase 2	Cancer,Connective Tissue Disorders,Dermatological Diseases and Conditions,Developmental Disorder,Gastrointestinal Disease,Hematological Disease,Hepatic System Disease,Hereditary Disorder,Hypersensitivity Response,Immunological Disease,Inflammatory Disease,Inflammatory Response,Metabolic Disease,Neurological Disease,Organismal Injury and Abnormalities,Psychological Disorders,Reproductive System Di…	Cytoplasm	enzyme	Aryl Hydrocarbon Receptor Signaling,NRF2-mediated Oxidative Stress Response,Xenobiotic Metabolism AHR Signaling Pathway,Xenobiotic Metabolism General Signaling Pathway,Xenobiotic Metabolism Signaling	Human,Mouse,Rat	Adipocytes,Adipose,Astrocytes,B lymphocytes not otherwise specified,BDCA-1+ dendritic cells,BDCA-3+ dendritic cells,Brain,Cardiomyocytes,Crypt,Dendritic cells not otherwise specified,Dermis,Endothelial cells not otherwise specified,Epidermis,Fibroblasts,Granulocytes not otherwise specified,Granulosa cells,Heart,Hematopoietic progenitor cells,Hepatocytes,Keratinocytes,Kidney,Langerhans cells,Liver…
hsa-miR-942	miR-12202-3p (and other miRNAs w/seed CUUCUCU)	TargetScan Human	High (predicted)	NT5DC4	5'-nucleotidase domain containing 4	Cancer,Dermatological Diseases and Conditions,Organismal Injury and Abnormalities	Other	other		Human	Cardiomyocytes,Crypt,Effector memory RA+ cytotoxic T cells,Heart,Macrophages not otherwise specified,Mammary Gland,Monocytes not otherwise specified,Other Cells,Other Epithelial cells,Other Nervous System,Other Neurons,Other Organ Systems,Pancreas,Placenta,Prostate Gland,Smooth Muscle,Stromal cells,Testis,Thymus,Uterus,THP-1
hsa-miR-942	miR-12202-3p (and other miRNAs w/seed CUUCUCU)	TargetScan Mouse,TargetScan Human	High (predicted),Moderate (predicted)	NTM	neurotrimin	Cancer,Connective Tissue Disorders,Dermatological Diseases and Conditions,Endocrine System Disorders,Gastrointestinal Disease,Hematological Disease,Immunological Disease,Inflammatory Disease,Neurological Disease,Organismal Injury and Abnormalities,Reproductive System Disease,Respiratory Disease	Plasma Membrane	other		Human,Mouse,Rat	Activated helper T cells,Adipocytes,Adipose,Amygdala,Astrocytes,B lymphocytes not otherwise specified,Bladder,Cardiomyocytes,Central memory cytotoxic T cells,Cerebellum,Cerebral Cortex,Crypt,Cytotoxic T cells,Dendritic cells not otherwise specified,Dermis,Dorsal Root Ganglion,Effector memory cytotoxic T cells,Effector memory RA+ cytotoxic T cells,Effector T cells,Endothelial cells not otherwise s…
hsa-miR-942	miR-12202-3p (and other miRNAs w/seed CUUCUCU)	TargetScan Mouse	High (predicted)	ODAD4	outer dynein arm docking complex subunit 4	Cardiovascular Disease,Developmental Disorder,Gastrointestinal Disease,Hereditary Disorder,Organismal Injury and Abnormalities,Reproductive System Disease,Respiratory Disease	Cytoplasm	other		Human,Mouse,Rat	Adipocytes,Adipose,Astrocytes,Cardiomyocytes,Crypt,Endothelial cells not otherwise specified,Fibroblasts,Granulocytes not otherwise specified,Granulosa cells,Heart,Hematopoietic progenitor cells,Hepatocytes,Kidney,Liver,Lung,Macrophages not otherwise specified,Mammary Gland,Microglia,Monocytes not otherwise specified,Natural T-regulatory cells,Other Cells,Other Epithelial cells,Other Nervous Syst…
hsa-miR-942	miR-12202-3p (and other miRNAs w/seed CUUCUCU)	TargetScan Human	High (predicted)	OPCML	opioid binding protein/cell adhesion molecule like	Cancer,Dermatological Diseases and Conditions,Endocrine System Disorders,Gastrointestinal Disease,Hepatic System Disease,Neurological Disease,Organismal Injury and Abnormalities,Psychological Disorders,Reproductive System Disease,Respiratory Disease	Plasma Membrane	other		Human,Mouse,Rat	Adipose,Amygdala,Astrocytes,B lymphocytes not otherwise specified,Bladder,Cardiomyocytes,Cerebellum,Cerebral Cortex,Cytotoxic T cells,Dermis,Dorsal Root Ganglion,Effector T cells,Endothelial cells not otherwise specified,Epidermis,Heart,Hippocampus,Hypothalamus,Keratinocytes,Kidney,Langerhans cells,Large Intestine,Liver,Lung,Macrophages not otherwise specified,Mammary Gland,Microglia,Olfactory Bu…
hsa-miR-942	miR-12202-3p (and other miRNAs w/seed CUUCUCU)	TargetScan Mouse	High (predicted)	OPRK1	opioid receptor kappa 1	Antimicrobial Response,Cancer,Cardiovascular Disease,Connective Tissue Disorders,Dermatological Diseases and Conditions,Developmental Disorder,Endocrine System Disorders,Gastrointestinal Disease,Hematological Disease,Hepatic System Disease,Hereditary Disorder,Immunological Disease,Infectious Disease,Inflammatory Disease,Inflammatory Response,Metabolic Disease,Neurological Disease,Nutritional Dise…	Plasma Membrane	G-protein coupled receptor	Breast Cancer Regulation by Stathmin1,cAMP-mediated signaling,CREB Signaling in Neurons,FAK Signaling,G-Protein Coupled Receptor Signaling,Gαi Signaling,Myelination Signaling Pathway,Opioid Signaling Pathway,Phagosome Formation,S100 Family Signaling Pathway	Human,Mouse,Rat	Amygdala,Astrocytes,Brain,Brainstem,Cardiomyocytes,Caudate Nucleus,Cerebellum,Cerebral Cortex,Dendritic cells not otherwise specified,Embryonic stem cells,Endothelial cells not otherwise specified,Fibroblasts,Granule Cell Layer,Gray Matter,Heart,Hippocampus,Hypothalamus,Mast cells,Medulla Oblongata,Neurons not otherwise specified,Nucleus Accumbens,Olfactory Bulb,Other Cells,Other Epithelial cells…
hsa-miR-942	miR-12202-3p (and other miRNAs w/seed CUUCUCU)	TargetScan Mouse	High (predicted)	ORMDL1	ORMDL sphingolipid biosynthesis regulator 1	Cancer,Gastrointestinal Disease,Organismal Injury and Abnormalities	Cytoplasm	other		Human,Mouse	Activated helper T cells,Adipocytes,Adipose,Amygdala,Astrocytes,B lymphocytes not otherwise specified,BDCA-1+ dendritic cells,BDCA-3+ dendritic cells,Bladder,Cardiomyocytes,Central memory cytotoxic T cells,Cerebellum,Cerebral Cortex,Crypt,Cytotoxic T cells,Dendritic cells not otherwise specified,Dermis,Dorsal Root Ganglion,Effector memory cytotoxic T cells,Effector memory RA+ cytotoxic T cells,Ef…
hsa-miR-942	miR-12202-3p (and other miRNAs w/seed CUUCUCU)	TargetScan Mouse	High (predicted)	OSBPL1A	oxysterol binding protein like 1A	Cancer,Dermatological Diseases and Conditions,Endocrine System Disorders,Gastrointestinal Disease,Hematological Disease,Hepatic System Disease,Immunological Disease,Inflammatory Disease,Neurological Disease,Organismal Injury and Abnormalities,Renal and Urological Disease,Reproductive System Disease,Skeletal and Muscular Disorders	Cytoplasm	transporter		Human,Mouse,Rat	Adipocytes,Adipose,Amygdala,Astrocytes,B lymphocytes not otherwise specified,Bladder,Brain,Brainstem,Cardiomyocytes,Cerebellum,Cerebral Cortex,Crypt,Cytotoxic T cells,Dendritic cells not otherwise specified,Dermis,Dorsal Root Ganglion,Effector T cells,Endothelial cells not otherwise specified,Epidermis,Fibroblasts,Granulocytes not otherwise specified,Granulosa cells,Heart,Hematopoietic progenitor…
hsa-miR-942	miR-12202-3p (and other miRNAs w/seed CUUCUCU)	TargetScan Mouse	High (predicted)	OSGEP	O-sialoglycoprotein endopeptidase	Cancer,Connective Tissue Disorders,Dermatological Diseases and Conditions,Developmental Disorder,Gastrointestinal Disease,Hepatic System Disease,Hereditary Disorder,Neurological Disease,Organismal Injury and Abnormalities,Renal and Urological Disease,Skeletal and Muscular Disorders	Nucleus	peptidase		Human,Mouse,Rat	Activated helper T cells,Activated Vd1 Gamma-delta T cells,Activated Vd2 Gamma-delta T cells,Adipocytes,Adipose,Astrocytes,B lymphocytes not otherwise specified,BDCA-1+ dendritic cells,BDCA-3+ dendritic cells,Cardiomyocytes,Central memory cytotoxic T cells,Central memory helper T cells,Crypt,Cytotoxic T cells,Dendritic cells not otherwise specified,Dermis,Effector memory cytotoxic T cells,Effecto…
[truncated: 10,539 more rows]
